# Supplementary material for: Association of Prenatal Alcohol Exposure With Psychological, Behavioral, and Neurodevelopmental Outcomes in Children From the Adolescent Brain Cognitive Development Study
Source: Atypon-hosted journal article supplement (doi:10.1176/appi.ajp.2020.20010086), 2020-09-25
Supplement: appi.ajp.2020.20010086.ds001.pdf [file appi.ajp.2020.20010086.ds001.pdf]

Online supplement for Lees et al., Association of Prenatal Alcohol Exposure With Psychological, Behavioral, and Neurodevelopmental Outcomes in Children From the Adolescent Brain Cognitive Development Study. *Am J Psychiatry* (doi: 10.1176/appi.ajp.2020.20010086).

### ***Methods: Additional Details***

The validated Developmental History Questionnaire, originally developed by the Adolescent Component of the National Comorbidity Survey (Merikangas et al., 2009, Kessler et al., 2009), was modified by the ABCD team to include additional questions on maternal use of substances during pregnancy.

### ***ABCD Baseline Alcohol Use Questions During Pregnancy***

- Before you/biological mom found out you/biological mom were pregnant, but while you might have been pregnant with this child, did you use any of the following? Alcohol?
- Before knowing of pregnancy, what was the maximum number of drinks consumed in one sitting?
- Before knowing of pregnancy, what was the average number of drinks consumed per week?
- Once you/biological mom knew you/she were pregnant, were you/biological mom use any of the following? Alcohol?
- After knowing of pregnancy, what was the maximum number of drinks consumed in one sitting?
- After knowing of pregnancy, what was the average number of drinks consumed per week?

### ***Examining prenatal alcohol exposure.***

The categorical PAE variable included all youth with any parent-reported prenatal alcohol exposure before or after knowledge of pregnancy. To examine the dose-dependent relationship of PAE on outcomes of interest, an estimate of the total number of drinks consumed during pregnancy was calculated. This was based on: a) average number of drinks consumed per week before pregnancy knowledge, b) the week the mother learned of pregnancy, c) average number of drinks consumed per week following pregnancy knowledge, and d) gestational week of birth. Two weeks were subtracted from reported week of pregnancy knowledge to adjust for conception date.

$$\text{Estimate of total drinks} = ab + c(d - b - 2)$$

To explore the effect of common PAE patterns, maternal drinking was categorized into abstinent (< 1 standard drink/occasion throughout pregnancy), light (1-2 drinks/occasion, <7 drinks/week), moderate (3-4/occasion, <7/week), heavy (<5/occasion, 7+/week), or binge drinking (5+/occasion) before and after knowing of pregnancy, based on established prenatal alcohol use classification (O'Leary et al., 2010). Common patterns were identified:

- 1) Abstinent throughout pregnancy;
- 2) Light reducers (light before knowing, abstinent after knowing of pregnancy);
- 3) Heavier reducers (moderate, heavy, and binge drinkers before knowing, abstinent or light drinking after knowing);
- 4) Stable light drinkers throughout pregnancy;
- 5) Stable heavier drinkers throughout pregnancy;
- 6) Increasesers (drank more after knowledge of pregnancy).

## Additional Results

**Table S1.** Psychological, behavioral and cognitive characteristics.

|                                                                           | Total | No prenatal alcohol exposure |      | Prenatal alcohol exposure |      | <i>p</i> |
|---------------------------------------------------------------------------|-------|------------------------------|------|---------------------------|------|----------|
|                                                                           | N     | N                            | %    | N                         | %    |          |
| <b>Past/present mental disorders</b>                                      |       |                              |      |                           |      |          |
| Depression                                                                | 264   | 195                          | 2.7  | 69                        | 2.7  | 1.0      |
| Generalized Anxiety Disorder                                              | 409   | 288                          | 4.0  | 121                       | 4.8  | .10      |
| Panic Disorder                                                            | 27    | 18                           | 0.2  | 9                         | 0.4  | .51      |
| Separation Anxiety                                                        | 834   | 554                          | 7.7  | 280                       | 11.1 | <.001    |
| Social Anxiety/Selective Mutism Disorder                                  | 453   | 326                          | 4.5  | 127                       | 5.0  | .32      |
| Hallucinations                                                            | 46    | 28                           | 0.4  | 18                        | 0.7  | .06      |
| Delusions                                                                 | 163   | 116                          | 1.6  | 47                        | 1.9  | .45      |
| Attention Deficit Hyperactivity                                           | 1,870 | 1,314                        | 18.2 | 556                       | 22.1 | <.001    |
| Oppositional Defiant Disorder                                             | 1,283 | 868                          | 12.1 | 415                       | 16.5 | <.001    |
| Conduct Disorder                                                          | 271   | 190                          | 2.6  | 81                        | 3.2  | .15      |
| Obsessive-Compulsive Disorder                                             | 844   | 597                          | 8.3  | 247                       | 9.8  | .02      |
| Unspecific Bipolar and Related Disorder                                   | 324   | 251                          | 3.5  | 73                        | 2.9  | .18      |
| Post Traumatic Stress Disorder                                            | 170   | 116                          | 1.6  | 54                        | 2.1  | .10      |
| Specific Phobia                                                           | 2,511 | 1,826                        | 25.4 | 685                       | 27.2 | .08      |
| <b>Cash Choice Task</b> – delayed gratification                           | 5,535 | 4,067                        | 56.5 | 1,468                     | 58.3 | .29      |
|                                                                           | Mean  | Mean                         | SD   | Mean                      | SD   | <i>p</i> |
| <b>Psychological problems (CBCL)</b>                                      |       |                              |      |                           |      |          |
| Total problems                                                            | 45.6  | 45.0                         | 11.3 | 47.2                      | 10.8 | <.001    |
| Externalizing                                                             | 45.4  | 45.0                         | 10.1 | 46.6                      | 10.3 | <.001    |
| Rule breaking behavior                                                    | 52.6  | 52.5                         | 4.6  | 52.9                      | 4.9  | <.001    |
| Aggressive behavior                                                       | 52.7  | 52.5                         | 5.2  | 53.1                      | 5.7  | <.001    |
| Internalizing                                                             | 48.4  | 48.0                         | 10.6 | 49.5                      | 10.4 | <.001    |
| Anxious/Depressed                                                         | 53.4  | 53.3                         | 5.9  | 53.8                      | 6.0  | <.001    |
| Withdrawn/Depressed                                                       | 53.4  | 53.3                         | 5.6  | 53.7                      | 5.9  | .005     |
| Somatic complaints                                                        | 54.9  | 54.7                         | 6.0  | 55.4                      | 6.2  | <.001    |
| Social problems                                                           | 52.7  | 52.6                         | 4.6  | 52.8                      | 4.6  | .129     |
| Thought problems                                                          | 53.7  | 53.5                         | 5.7  | 54.3                      | 6.1  | <.001    |
| Attention problems                                                        | 53.8  | 53.6                         | 5.9  | 54.2                      | 6.3  | <.001    |
| <b>Impulsivity (UPPS-P)</b>                                               |       |                              |      |                           |      |          |
| Lack of planning                                                          | 7.8   | 7.7                          | 2.4  | 7.9                       | 2.3  | <.001    |
| Sensation seeking                                                         | 9.8   | 9.7                          | 2.7  | 10.0                      | 2.6  | <.001    |
| Negative urgency                                                          | 8.5   | 8.4                          | 2.6  | 8.6                       | 2.6  | .02      |
| Positive urgency                                                          | 8.0   | 8.0                          | 3.0  | 7.9                       | 2.9  | .62      |
| Lack of perseverance                                                      | 7.0   | 7.0                          | 2.2  | 7.1                       | 2.2  | .07      |
| <b>Motivation (BIS/BAS)</b>                                               |       |                              |      |                           |      |          |
| Behavioral inhibition                                                     | 5.5   | 5.5                          | 2.9  | 5.5                       | 2.8  | .47      |
| Reward responsiveness                                                     | 8.8   | 8.8                          | 2.4  | 8.7                       | 2.4  | .09      |
| Drive                                                                     | 4.1   | 4.1                          | 3.1  | 4.0                       | 2.9  | .04      |
| Fun seeking                                                               | 5.7   | 5.7                          | 2.7  | 5.7                       | 2.5  | .04      |
| <b>NIH Toolbox fluid intelligence</b>                                     |       |                              |      |                           |      |          |
| Processing Speed (Pattern Comparison)                                     | 93.8  | 93.7                         | 22.0 | 94.2                      | 22.2 | .43      |
| Working memory (List Sorting)                                             | 100.9 | 100.2                        | 14.7 | 102.9                     | 14.4 | <.001    |
| Episodic memory (Picture Sequence)                                        | 101.4 | 101.0                        | 16.0 | 102.50                    | 16.4 | <.001    |
| Executive function / attention / inhibition (Flanker)                     | 95.6  | 95.2                         | 13.7 | 96.8                      | 13.3 | <.001    |
| Executive function / cognitive flexibility (Dimensional Change Card Sort) | 96.9  | 96.4                         | 15.1 | 98.3                      | 15.3 | <.001    |
| <b>RAVLT</b>                                                              |       |                              |      |                           |      |          |
| Learning (Trials I-V avg)                                                 | 8.9   | 8.8                          | 2.0  | 9.1                       | 1.9  | <.001    |
| Immediate delay (Trial VI)                                                | 9.7   | 9.6                          | 3.0  | 10.0                      | 2.9  | <.001    |
| Long (30 min) delay (Trial VII)                                           | 9.2   | 9.1                          | 3.2  | 9.6                       | 3.1  | <.001    |

**PAE Dichotomous Analysis: Additional Results**

**Table S2:** Psychological, behavioral, and cognitive outcomes associated with any prenatal alcohol exposure, when adjusting for random effects only (family, site).

|                                                                           | <i>B</i> (95% CI)    | <i>p</i> | <i>R</i> <sup>2</sup> |
|---------------------------------------------------------------------------|----------------------|----------|-----------------------|
| <b>CBCL</b>                                                               |                      |          |                       |
| Total problems                                                            | 2.61 (2.08, 3.13)    | <.001    | .007                  |
| Externalizing                                                             | 1.95 (1.47, 2.43)    | <.001    | .005                  |
| Rule breaking behavior                                                    | 0.56 (0.34, 0.78)    | <.001    | .002                  |
| Aggressive behavior                                                       | 0.70 (0.45, 0.95)    | <.001    | .002                  |
| Internalizing                                                             | 1.91 (1.42, 2.41)    | <.001    | .004                  |
| Anxious/depressed                                                         | 0.69 (0.41, 0.97)    | <.001    | .001                  |
| Withdrawn/depressed                                                       | 0.50 (0.23, 0.77)    | <.001    | .001                  |
| Somatic complaints                                                        | 0.78 (0.49, 1.07)    | <.001    | .002                  |
| Social problems                                                           | 0.28 (0.06, 0.49)    | .01      | <.001                 |
| Thought problems                                                          | 0.93 (0.66, 1.21)    | <.001    | .003                  |
| Attention problems                                                        | 0.79 (0.50, 1.07)    | <.001    | .002                  |
| <b>KSADS</b>                                                              |                      |          |                       |
| Depression                                                                | 0.01 (-0.13, 0.15)   | .93      | <.001                 |
| Generalized Anxiety Disorder                                              | 0.19 (0.08, 0.30)    | .08      | <.001                 |
| Panic Disorder                                                            | 0.35 (-0.06, 0.76)   | .39      | <.001                 |
| Separation Anxiety                                                        | 0.41 (0.33, 0.49)    | <.001    | .003                  |
| Social Anxiety/Selective Mutism Disorder                                  | 0.10 (0.00, 0.21)    | .33      | <.001                 |
| Hallucinations                                                            | 0.60 (0.30, 0.91)    | .05      | <.001                 |
| Delusions                                                                 | 0.15 (-0.03, 0.32)   | .40      | <.001                 |
| Attention Deficit Hyperactivity                                           | 0.25 (0.19, 0.30)    | <.001    | .002                  |
| Oppositional Defiant Disorder                                             | 0.38 (0.31, 0.44)    | <.001    | .004                  |
| Conduct Disorder                                                          | 0.20 (0.06, 0.33)    | .14      | <.001                 |
| Obsessive-Compulsive Disorder                                             | 0.20 (0.12, 0.28)    | .01      | <.001                 |
| Unspecific Bipolar and Related Disorder                                   | -0.19 (-0.33, -0.06) | .15      | <.001                 |
| Post Traumatic Stress Disorder                                            | 0.29 (0.12, 0.45)    | .08      | <.001                 |
| Specific Phobia                                                           | 0.09 (0.04, 0.14)    | .09      | <.001                 |
| <b>UPPS-P</b>                                                             |                      |          |                       |
| Lack of planning                                                          | 0.29 (0.18, 0.40)    | <.001    | .003                  |
| Sensation seeking                                                         | 0.26 (0.13, 0.38)    | <.001    | .002                  |
| Negative urgency                                                          | 0.09 (-0.04, 0.21)   | .17      | <.001                 |
| Positive urgency                                                          | -0.02 (-0.16, 0.12)  | .80      | <.001                 |
| Lack of perseverance                                                      | 0.11 (0.00, 0.21)    | .05      | <.001                 |
| <b>BIS/BAS</b>                                                            |                      |          |                       |
| Behavioral inhibition                                                     | 0.09 (-0.04, 0.22)   | .19      | <.001                 |
| Reward responsiveness                                                     | -0.07 (-0.18, 0.04)  | .23      | <.001                 |
| Drive                                                                     | -0.10 (-0.25, 0.04)  | .15      | <.001                 |
| Fun seeking                                                               | 0.05 (-0.08, 0.17)   | .43      | <.001                 |
| <b>NIH Toolbox</b>                                                        |                      |          |                       |
| Processing Speed (Pattern Comparison)                                     | 0.07 (-0.96, 1.09)   | .90      | <.001                 |
| Working memory (List Sorting)                                             | 2.63 (1.95, 3.32)    | <.001    | .007                  |
| Episodic memory (Picture Sequence)                                        | 1.46 (0.71, 2.22)    | <.001    | .002                  |
| Executive function / attention / inhibition (Flanker)                     | 1.55 (0.92, 2.19)    | <.001    | .003                  |
| Executive function / cognitive flexibility (Dimensional Change Card Sort) | 1.81 (1.10, 2.52)    | <.001    | .003                  |
| <b>RAVLT</b>                                                              |                      |          |                       |
| Learning                                                                  | -0.23 (-0.24, -0.22) | <.001    | .003                  |
| Immediate delay                                                           | 0.37 (0.23, 0.51)    | <.001    | .003                  |
| Long (30 min) delay                                                       | 0.46 (0.32, 0.61)    | <.001    | .004                  |
| <b>Cash Choice Task</b>                                                   |                      |          |                       |
|                                                                           | 0.08 (0.03, 0.12)    | .12      | <.001                 |

Unstandardized regression coefficients and associated 95% confidence interval, p-value and R<sup>2</sup> value are presented for the effects of prenatal alcohol exposure compared to no exposure. GAMMs controlled for random effects (family, scanner/site).

**Table S3:** Structural brain measures associated with any prenatal alcohol exposure, when adjusting for random effects only (family, site).

| Region                            |   | B (95% CI)          | p     | R <sup>2</sup> |
|-----------------------------------|---|---------------------|-------|----------------|
| <b>Cortical volume</b>            |   |                     |       |                |
| <b>Frontal</b>                    |   |                     |       |                |
| Caudal middle frontal             | L | 162.2 (90.0-234.4)  | <.001 | .003           |
| Lateral orbitofrontal             | L | 160.2 (111.2-209.2) | <.001 | .005           |
|                                   | R | 128.2 (78.7-177.7)  | <.001 | .005           |
| Pars opercularis                  | L | 100.8 (51.3-150.2)  | .004  | .002           |
| Pars orbitalis                    | L | 60.0 (42.1-77.9)    | <.001 | .005           |
|                                   | R | 46.2 (24.7-67.6)    | .002  | .002           |
| Precentral                        | L | 191.5 (101.4-281.7) | .002  | .002           |
|                                   | R | 174.1 (84.4-263.8)  | .01   | .002           |
| Rostral middle frontal            | L | 265.7 (141.2-390.2) | .002  | .002           |
|                                   | R | 289.9 (164.2-415.5) | <.001 | .002           |
| Superior frontal                  | L | 343.2 (191.0-495.4) | <.001 | .003           |
|                                   | R | 392.4 (240.2-544.5) | <.001 | .004           |
| Frontal pole                      | L | 16.3 (7.7-25.0)     | .01   | .001           |
|                                   | R | 23.2 (12.0-34.5)    | .004  | .002           |
| Caudal middle frontal             | L | 152.2 (79.4-224.9)  | <.001 | .002           |
| Medial orbitofrontal              | R | 81.5 (45.7-117.3)   | <.001 | .003           |
| <b>Parietal</b>                   |   |                     |       |                |
| Postcentral                       | L | 210.2 (126.0-294.4) | <.001 | .003           |
| Precuneus                         | L | 219.4 (143.1-295.7) | <.001 | .003           |
|                                   | R | 257.3 (176.2-338.5) | <.001 | .004           |
| Superior parietal                 | L | 263.3 (158.1-368.4) | <.001 | .003           |
|                                   | R | 251.9 (146.5-357.3) | <.001 | .002           |
| Supramarginal                     | L | 209.6 (109.2-310.1) | .003  | .002           |
|                                   | R | 259.3 (166.1-352.5) | <.001 | .003           |
| Inferior parietal                 | L | 266.8 (158.1-375.5) | <.001 | .002           |
| Inferior parietal                 | R | 292.7 (166.4-418.9) | <.001 | .002           |
| <b>Temporal</b>                   |   |                     |       |                |
| Fusiform                          | L | 230.0 (150.7-309.4) | <.001 | .005           |
|                                   | R | 201.6 (124.1-279.1) | <.001 | .004           |
| Parahippocampal                   | L | 37.0 (16.2-57.7)    | .03   | .002           |
|                                   | R | 49.4 (29.1-69.6)    | <.001 | .003           |
| Superior temporal                 | L | 188.5 (102.7-274.2) | <.001 | .002           |
|                                   | R | 214.8 (137.1-292.5) | <.001 | .004           |
| Transverse temporal               | L | 24.6 (11.8-37.4)    | .01   | .002           |
|                                   | R | 22.9 (12.8-33.0)    | <.001 | .003           |
| Banks of superior temporal sulcus | L | 53.9 (29.9-78.0)    | <.001 | .002           |
| Inferior temporal                 | L | 343.0 (246.2-439.8) | <.001 | .006           |
|                                   | R | 236.3 (144.2-328.3) | <.001 | .003           |
| Middle temporal                   | L | 303.9 (217.9-390.0) | <.001 | .006           |
|                                   | R | 339.3 (248.9-429.8) | <.001 | .006           |
| Temporal pole                     | R | 38.2 (21.6-54.8)    | <.001 | .002           |
| <b>Occipital</b>                  |   |                     |       |                |
| Cuneus                            | L | 56.6 (28.5-84.6)    | .005  | .002           |
|                                   | R | 76.0 (44.1-107.9)   | <.001 | .002           |
| Lingual                           | L | 124.1 (66.7-181.5)  | .002  | .003           |
|                                   | R | 125.6 (70.0-181.2)  | <.001 | .003           |
| Lateral occipital                 | L | 319.0 (228.3-409.7) | <.001 | .005           |
|                                   | R | 300.9 (203.9-397.9) | <.001 | .004           |
| <b>Cingulate</b>                  |   |                     |       |                |
| Caudal anterior                   | L | 53.6 (25.3-81.9)    | .01   | .001           |
| Isthmus                           | L | 58.8 (29.5-88.2)    | .006  | .002           |

| <b>Region</b>                     |   | <b>B (95% CI)</b>         | <b>p</b> | <b>R<sup>2</sup></b> |
|-----------------------------------|---|---------------------------|----------|----------------------|
| Posterior                         | L | 66.5 (34.7-98.3)          | .003     | .002                 |
| Rostral anterior                  | L | 57.2 (29.3-85.1)          | .004     | .002                 |
| <b>Insula</b>                     | L | 72.8 (32.2-113.3)         | .03      | .002                 |
| <b>Subcortical volume</b>         |   |                           |          |                      |
| Cerebellum                        | L | 563.3 (311.0-815.6)       | <.001    | .003                 |
|                                   | R | 618.3 (359.7-876.9)       | <.001    | .004                 |
| Thalamus                          | L | 73.7 (40.-107.4)          | <.001    | .001                 |
|                                   | R | 59.8 (27.4-92.3)          | .01      | .001                 |
| Hippocampus                       | L | 39.4 (19.3-59.4)          | .004     | .001                 |
|                                   | R | 48.2 (28.4-68.0)          | <.001    | .002                 |
| Amygdala                          | L | 18.5 (8.5-28.4)           | .01      | .001                 |
|                                   | R | 18.7 (8.7-28.8)           | .01      | .001                 |
| Ventral diencephalon              | L | 30.5 (11.8-49.2)          | .05      | .001                 |
|                                   | R | 47.2 (28.4-65.9)          | <.001    | .003                 |
| Intracranial                      |   | 17582.0 (11190.3-23972.7) | <.001    | .002                 |
| Cerebrum                          |   | 15586.0 (10642.9-20529.7) | <.001    | .005                 |
| Total grey                        |   | 532.5 (300.2-764.8)       | <.001    | .002                 |
| <b>Surface area</b>               |   |                           |          |                      |
| <b>Frontal</b>                    |   |                           |          |                      |
| Caudal middle frontal             | L | 50.2 (29.0-71.3)          | .002     | .003                 |
|                                   | R | 49.1 (27.5-70.8)          | <.001    | .003                 |
| Lateral orbitofrontal             | L | 37.3 (23.0-51.5)          | <.001    | .004                 |
|                                   | R | 32.9 (18.0-47.8)          | <.001    | .004                 |
| Medial orbitofrontal              | L | 25.4 (13.5-37.2)          | .002     | .003                 |
|                                   | R | 26.2 (16.0-36.4)          | <.001    | .004                 |
| Pars opercularis                  | L | 25.9 (11.7-40.1)          | .02      | .002                 |
| Pars orbitalis                    | L | 12.0 (7.8-16.1)           | <.001    | .004                 |
|                                   | R | 10.5 (5.4-15.7)           | .004     | .002                 |
| Precentral                        | L | 54.3 (25.3-83.3)          | .02      | .002                 |
| Rostral middle frontal            | L | 73.1 (33.8-112.4)         | .02      | .002                 |
|                                   | R | 91.4 (50.7-132.1)         | <.001    | .003                 |
| Superior frontal                  | L | 103.5 (59.1-147.9)        | <.001    | .004                 |
|                                   | R | 110.0 (65.4-154.5)        | <.001    | .004                 |
| Frontal pole                      | R | 5.1 (2.7-7.4)             | .002     | .002                 |
| <b>Parietal</b>                   |   |                           |          |                      |
| Inferior parietal                 | L | 69.6 (35.6-103.6)         | .004     | .003                 |
|                                   | R | 74.9 (35.8-114.0)         | .01      | .002                 |
| Postcentral                       | L | 53.1 (26.7-79.6)          | .006     | .003                 |
| Precuneus                         | L | 64.0 (39.1-88.8)          | <.001    | .003                 |
|                                   | R | 78.0 (50.5-105.5)         | <.001    | .003                 |
| Superior parietal                 | L | 81.1 (46.2-116.0)         | <.001    | .003                 |
|                                   | R | 78.8 (44.5-113.2)         | <.001    | .003                 |
| Supramarginal                     | L | 54.7 (23.6-85.8)          | .04      | .002                 |
|                                   | R | 70.0 (41.2-98.7)          | <.001    | .004                 |
| <b>Temporal</b>                   |   |                           |          |                      |
| Fusiform                          | L | 56.0 (35.2-76.9)          | <.001    | .004                 |
|                                   | R | 52.0 (31.2-72.8)          | <.001    | .004                 |
| Middle temporal                   | L | 58.5 (37.4-79.6)          | <.001    | .005                 |
|                                   | R | 65.2 (42.7-87.7)          | <.001    | .005                 |
| Banks of superior temporal sulcus | R | 14.7 (7.1-22.3)           | .01      | .002                 |
| Inferior temporal                 | L | 77.9 (53.4-102.4)         | <.001    | .006                 |
|                                   | R | 55.4 (32.7-78.0)          | <.001    | .004                 |
| Superior temporal                 | R | 46.1 (25.5-66.7)          | <.001    | .004                 |
| Traverse temporal                 | R | 5.7 (3.0-8.3)             | .002     | .002                 |
| <b>Occipital</b>                  |   |                           |          |                      |

| <b>Region</b>             |   | <b>B (95% CI)</b> | <b>p</b> | <b>R<sup>2</sup></b> |
|---------------------------|---|-------------------|----------|----------------------|
| Lingual                   | L | 35.0 (14.9-55.1)  | .04      | .002                 |
|                           | R | 39.3 (19.8-58.7)  | .005     | .002                 |
| Lateral occipital         | L | 90.8 (60.4-121.2) | <.001    | .006                 |
|                           | R | 76.9 (45.7-108.2) | <.001    | .004                 |
| <b><i>Cingulate</i></b>   |   |                   |          |                      |
| Caudal anterior           | L | 14.7 (7.2-22.2)   | .009     | .002                 |
| Isthmus                   | L | 18.4 (8.7-28.1)   | .01      | .002                 |
| Posterior                 | L | 19.3 (9.4-29.3)   | .01      | .002                 |
| <b>Cortical thickness</b> |   |                   |          |                      |
| <b><i>Parietal</i></b>    |   |                   |          |                      |
| Postcentral               | L | .01 (.01-.02)     | .03      | <.001                |
| <b><i>Temporal</i></b>    |   |                   |          |                      |
| Middle temporal           | R | .01 (.01-.020)    | .04      | <.001                |
| <b><i>Occipital</i></b>   |   |                   |          |                      |
| Cuneus                    | L | .01 (.01-.02)     | .01      | .001                 |
|                           | R | .02 (.01-.03)     | <.001    | .002                 |
| Lateral occipital         | L | .01 (.00-.02)     | .04      | -.001                |
|                           | R | .01 (.01-.02)     | .004     | -.001                |
| Lingual                   | L | .01 (.01-.02)     | .03      | .001                 |

Unstandardized regression coefficients and associated 95% confidence interval, false discovery rate adjusted p-value and R<sup>2</sup> value are presented for the effects of prenatal alcohol exposure compared to no exposure. Only regions where the model passed the FDR correction for volume, surface area or cortical thickness are presented. These generalized additive mixed models controlled for random effects only (family, scanner/site).

**Table S4:** Functional connectivity indices associated with any prenatal alcohol exposure. Only the associations which passed FDR correction in unadjusted models are presented.

|                                       | <b>B (95% CI)</b>       | <b>p</b> | <b>R<sup>2</sup></b> |
|---------------------------------------|-------------------------|----------|----------------------|
| <b>Unadjusted Models</b>              |                         |          |                      |
| <b>Between networks</b>               |                         |          |                      |
| Sensorimotor hand – salience          | 0.007 (0.002, 0.011)    | .03      | .002                 |
| <b>Network – subcortical region</b>   |                         |          |                      |
| Auditory – right ventral diencephalon | -0.001 (-0.018, -0.006) | <.001    | .002                 |
| Default – left amygdala               | 0.013 (0.005, 0.020)    | .02      | .001                 |
| Salience – left ventral diencephalon  | -0.010 (-0.016, -0.004) | .01      | .001                 |
| <b>Adjusted Models</b>                |                         |          |                      |
| <b>Between networks</b>               |                         |          |                      |
| Sensorimotor hand – salience          | 0.010 (0.002, 0.012)    | .002     | .027                 |
| <b>Network – subcortical region</b>   |                         |          |                      |
| Auditory – right ventral diencephalon | -0.010 (-0.018, -0.006) | .001     | .012                 |
| Default – left amygdala               | 0.015 (0.004, 0.019)    | .09      | .003                 |
| Salience – left ventral diencephalon  | -0.008 (-0.015, -0.001) | .48      | .006                 |

Unstandardized regression coefficients and associated 95% confidence interval, false discovery rate adjusted p-value and R<sup>2</sup> value are presented for the effects of prenatal alcohol exposure compared to no exposure. Only the network connectivity associations where the model passed the FDR correction in unadjusted models are presented. Unadjusted generalized additive mixed models controlled for random effects only (family, scanner/site). Adjusted models controlled for fixed (age, sex, race/ethnicity, birthweight, premature birth, maternal age at birth, highest parent education, maternal depression, other prenatal substance use) and random (family, scanner/site) effects.

Note, hyperconnectivity between the default network and left amygdala, and hypoconnectivity between the salience network and left ventral diencephalon, among PAE compared to unexposed youth was no longer significant in the covariate-adjusted models.



**Table S5:** Functional connectivity within and between major networks which have previously been associated with fetal alcohol spectrum disorder. No associations were significant in unadjusted or adjusted models.

|                                    | <b>B (95% CI)</b>      | <b>p</b> | <b>R<sup>2</sup></b> |
|------------------------------------|------------------------|----------|----------------------|
| <b>Unadjusted models</b>           |                        |          |                      |
| <b><i>Within networks</i></b>      |                        |          |                      |
| Default                            | 0.002 (-0.002, 0.006)  | .30      | -.0002               |
| Saliience                          | -0.005 (-0.014, 0.005) | .33      | .0002                |
| Dorsal attention                   | 0.002 (-0.002, 0.006)  | .42      | -.0003               |
| Fronto-parietal                    | -0.001 (-0.005, 0.003) | .56      | <.0001               |
| <b><i>Between networks</i></b>     |                        |          |                      |
| Default – saliience                | 0.001 (-0.003, 0.005)  | .64      | .0000                |
| Default – dorsal attention         | -0.001 (-0.004, 0.003) | .67      | -.0003               |
| Default – fronto-parietal          | 0.000 (-0.003, 0.003)  | .87      | -.0001               |
| Saliience – dorsal attention       | 0.000 (-0.004, 0.004)  | .91      | .0004                |
| Saliience – fronto-parietal        | 0.000 (-0.005, 0.004)  | .82      | <.0001               |
| Dorsal attention – fronto-parietal | 0.000 (-0.002, 0.003)  | .81      | <.0001               |
| <b>Covariate-adjusted models</b>   |                        |          |                      |
| <b><i>Within networks</i></b>      |                        |          |                      |
| Default                            | 0.001 (-0.003, 0.004)  | .79      | .027                 |
| Saliience                          | -0.008 (-0.018, 0.002) | .13      | .004                 |
| Dorsal attention                   | 0.000 (-0.004, 0.004)  | .96      | .012                 |
| Fronto-parietal                    | -0.002 (-0.006, 0.002) | .33      | .012                 |
| <b><i>Between networks</i></b>     |                        |          |                      |
| Default – saliience                | 0.000 (-0.006, 0.004)  | .69      | .008                 |
| Default – dorsal attention         | 0.000 (-0.003, 0.004)  | .82      | .027                 |
| Default – fronto-parietal          | 0.000 (-0.003, 0.003)  | .77      | .006                 |
| Saliience – dorsal attention       | 0.001 (-0.003, 0.006)  | .52      | .006                 |
| Saliience – fronto-parietal        | -0.001 (-0.006, 0.003) | .61      | .002                 |
| Dorsal attention – fronto-parietal | 0.000 (-0.002, 0.003)  | .71      | .002                 |

Unstandardized regression coefficients and associated 95% confidence interval, p-value and R<sup>2</sup> value are presented for the effects of prenatal alcohol exposure compared to no exposure. Unadjusted generalized additive mixed models controlled for random effects only (family, scanner/site). Adjusted models controlled for fixed (age, sex, race/ethnicity, birthweight, premature birth, maternal age at birth, highest parent education, maternal depression, other prenatal substance use) and random (family, scanner/site) effects.

**Table S6:** Dichotomous PAE variable follow-up analysis for regional brain ROIs when including intracranial volume as an additional covariate.

|                   |   | <b>B (95% CI)</b>   | <b>p</b> | <b>R<sup>2</sup></b> |
|-------------------|---|---------------------|----------|----------------------|
| <i>Volume</i>     |   |                     |          |                      |
| Inferior parietal | L | 118.1 (25.1, 211.0) | .08      | .356                 |
| Supramarginal     | R | 89.1 (9.0, 169.1)   | .18      | .358                 |
| Inferior temporal | L | 126.4 (46.9, 205.8) | .01      | .323                 |
| Middle temporal   | L | 82.1 (12.9, 151.2)  | .12      | .439                 |
|                   | R | 79.5 (11.6, 147.4)  | .13      | .498                 |
| Lateral occipital | L | 89.3 (15.1, 163.5)  | .11      | .412                 |

Unstandardized regression coefficients and associated 95% confidence interval, false discovery rate adjusted p-value and R<sup>2</sup> value are presented for generalized additive model results for the effects of prenatal alcohol exposure compared to no exposure. Only regional brain ROIs identified from first series of analyses are presented. These generalized additive mixed models controlled for fixed (age, sex, race/ethnicity, birthweight, premature birth, maternal age at birth, highest parent education, maternal depression, other prenatal substance use) and random (family, scanner/site) effects.

**Table S7: Significant associations between covariates included in GAMMs and outcomes**

|                          | Structural MRI | Resting-state functional MRI | Behavioral outcomes                     | Cognitive outcomes                        |
|--------------------------|----------------|------------------------------|-----------------------------------------|-------------------------------------------|
|                          |                |                              | <i>Higher scores = Greater problems</i> | <i>Higher scores = Better performance</i> |
| <b>Youth measures</b>    |                |                              |                                         |                                           |
| ↑ Age                    | -              | +/-                          | +                                       | +                                         |
| Being female             | +              | -                            | +                                       | -                                         |
| Race (compared to white) | -              | +/-                          | +/-                                     | +/-                                       |
| Born premature           | +              |                              | +                                       |                                           |
| ↑ Birthweight            | +              | -                            |                                         | +                                         |
| ↑ School grades          | +              |                              | -                                       | +                                         |
| Tobacco exposure         |                | -                            | +                                       |                                           |
| Cannabis exposure        |                |                              | +                                       |                                           |
| Heroin exposure          |                |                              |                                         |                                           |
| Cocaine exposure         |                |                              | +                                       |                                           |
| ↑ School grade           |                | +                            |                                         |                                           |
| <b>Parent measures</b>   |                |                              |                                         |                                           |
| ↑ Parent education       | +              |                              | -                                       | +                                         |
| Maternal depression      |                |                              | +                                       | +/-                                       |
| ↑ Maternal age           | +              |                              | -                                       | +                                         |

"+" = positive association, "-" = negative association, "+/-" = both positive and negative associations were observed. If there is no + or -, no significant association was observed in the GAMMs.

## Dose-Dependent Relationship Analysis Results

**Table S8:** Generalized additive model results for alcohol use as a continuous measure, using an estimate of total drinks throughout pregnancy, when adjusting for fixed and random effects.

|                                                                           | <i>B</i> (95% CI)      | <i>p</i> | <i>R</i> <sup>2</sup> |
|---------------------------------------------------------------------------|------------------------|----------|-----------------------|
| <b>CBCL</b>                                                               |                        |          |                       |
| Total problems                                                            | 0.02 (0.00, 0.03)      | .009     | .137                  |
| Externalizing                                                             | 0.01 (0.00, 0.03)      | .07      | .107                  |
| Rule breaking behavior                                                    | 0.00 (0.00, 0.01)      | .47      | .111                  |
| Aggressive behavior                                                       | 0.00 (0.00, 0.01)      | .35      | .089                  |
| Internalizing                                                             | 0.02 (0.00, 0.32)      | .02      | .076                  |
| Anxious/depressed                                                         | 0.01 (0.00, 0.01)      | .14      | .051                  |
| Withdrawn/depressed                                                       | 0.01 (0.00, 0.01)      | .14      | .071                  |
| Somatic complaints                                                        | 0.01 (0.01, 0.02)      | .001     | .042                  |
| Social problems                                                           | 0.00 (0.00, 0.01)      | .63      | .102                  |
| Thought problems                                                          | 0.00 (0.00, 0.01)      | .22      | .078                  |
| Attention problems                                                        | 0.01 (0.00, 0.02)      | .04      | .169                  |
| <b>KSADS</b>                                                              |                        |          |                       |
| Depression                                                                | 0.00 (-0.01, 0.00)     | .83      | .027                  |
| Generalized Anxiety Disorder                                              | 0.00 (-0.01, 0.00)     | .53      | .026                  |
| Panic Disorder                                                            | 0.00 (-0.01, 0.00)     | .54      | .003                  |
| Separation Anxiety                                                        | 0.00 (-0.01, 0.00)     | .31      | .026                  |
| Social Anxiety/Selective Mutism Disorder                                  | 0.00 (-0.01, 0.00)     | .50      | .015                  |
| Hallucinations                                                            | 0.00 (-0.01, 0.00)     | .42      | .004                  |
| Delusions                                                                 | 0.00 (-0.01, 0.00)     | .95      | .010                  |
| Attention Deficit Hyperactivity                                           | 0.00 (0.00, 0.00)      | .11      | .130                  |
| Oppositional Defiant Disorder                                             | 0.00 (0.00, 0.00)      | .46      | .049                  |
| Conduct Disorder                                                          | -0.01 (-0.01, 0.00)    | .19      | .040                  |
| Obsessive-Compulsive Disorder                                             | 0.00 (0.00, 0.01)      | .12      | .019                  |
| Unspecific Bipolar and Related Disorder                                   | 0.00 (-0.01, 0.00)     | .33      | .017                  |
| Post Traumatic Stress Disorder                                            | 0.00 (-0.01, 0.00)     | .42      | .030                  |
| Specific Phobia                                                           | 0.00 (0.00, 0.00)      | .25      | .019                  |
| <b>UPPS-P</b>                                                             |                        |          |                       |
| Lack of planning                                                          | 0.002 (-0.002, 0.005)  | .35      | .030                  |
| Sensation seeking                                                         | 0.006 (0.002, 0.009)   | .003     | .026                  |
| Negative urgency                                                          | 0.002 (-0.002, 0.005)  | .42      | .017                  |
| Positive urgency                                                          | 0.001 (-0.003, 0.006)  | .47      | .049                  |
| Lack of perseverance                                                      | 0.001 (-0.002, 0.004)  | .46      | .049                  |
| <b>BIS/BAS</b>                                                            |                        |          |                       |
| Behavioral inhibition                                                     | 0.003 (-0.001, 0.007)  | .12      | .010                  |
| Reward responsiveness                                                     | 0.001 (-0.002, 0.005)  | .48      | .023                  |
| Drive                                                                     | 0.001 (-0.004, 0.005)  | .77      | .060                  |
| Fun seeking                                                               | 0.003 (-0.001, 0.007)  | .99      | .023                  |
| <b>NIH Toolbox</b>                                                        |                        |          |                       |
| Processing Speed (Pattern Comparison)                                     | -0.006 (-0.037, 0.024) | .67      | .056                  |
| Working memory (List Sorting)                                             | 0.013 (-0.006, 0.032)  | .18      | .151                  |
| Episodic memory (Picture Sequence)                                        | 0.000 (-0.022, 0.021)  | .97      | .091                  |
| Executive function / attention / inhibition (Flanker)                     | 0.023 (0.005, 0.042)   | .01      | .051                  |
| Executive function / cognitive flexibility (Dimensional Change Card Sort) | 0.014 (-0.007, 0.035)  | .18      | .080                  |
| <b>RAVLT</b>                                                              |                        |          |                       |
| Learning                                                                  | -0.66 (-0.97, -0.35)   | <.001    | .130                  |

|                                       |   |                             |       |      |
|---------------------------------------|---|-----------------------------|-------|------|
| Immediate delay                       |   | 0.00 (0.00, 0.01)           | .45   | .130 |
| Long (30 min) delay                   |   | 0.00 (0.00, 0.01)           | .10   | .137 |
| <b>Cash Choice Task</b>               |   | -0.001 (-0.002, 0.000)      | .55   | .005 |
| <b>Brain structure</b>                |   |                             |       |      |
| <i>Volume</i>                         |   |                             |       |      |
| Cerebrum                              |   | 8005.30 (3654.66, 12355.96) | <.001 | .342 |
| Inferior parietal                     | L | 206.53 (98.71, 314.34)      | .01   | .150 |
| Supramarginal                         | R | 167.17 (74.34, 260.01)      | .03   | .135 |
| Inferior temporal                     | L | 214.54 (120.51, 308.57)     | <.001 | .194 |
| Middle temporal                       | L | 154.07 (71.46, 236.67)      | .02   | .205 |
|                                       | R | 162.64 (78.3, 246.9)        | .01   | .258 |
| Lateral occipital                     | L | 155.15 (69.8, 240.5)        | .02   | .248 |
| <i>Surface area</i>                   |   |                             |       |      |
| Precuneus                             | R | 48.62 (22.3, 74.9)          | .02   | .215 |
| Inferior temporal                     | L | 51.46 (27.75, 75.17)        | .001  | .196 |
| Lateral occipital                     | L | 53.64 (24.8, 82.5)          | .02   | .213 |
| <b>Functional connectivity</b>        |   |                             |       |      |
| Sensorimotor hand – salience          |   | 0.00 (0.00, 0.00)           | .45   | .005 |
| Auditory – right ventral diencephalon |   | -0.0002 (-0.0003, -0.00002) | .03   | .011 |

Unstandardized regression coefficients and associated 95% confidence interval, p-value/false discovery rate adjusted p-value (for brain ROIs) and  $R^2$  value are presented for generalised additive model results for alcohol use as a continuous measure, using an estimate of total drinks throughout pregnancy. Only brain ROIs identified from first series of analyses are presented. These generalized additive mixed models controlled for fixed (age, sex, race/ethnicity, birthweight, premature birth, maternal age at birth, highest parent education, maternal depression, other prenatal substance use, school grade) and random (family, scanner/site) effects. N=8811. Data winsorized at .015.

**Figure S1: Spline models for estimated total number of alcoholic drinks consumed during pregnancy with offspring brain volume and surface area, when adjusting for fixed and random effects.**

**A. Left inferior parietal volume**

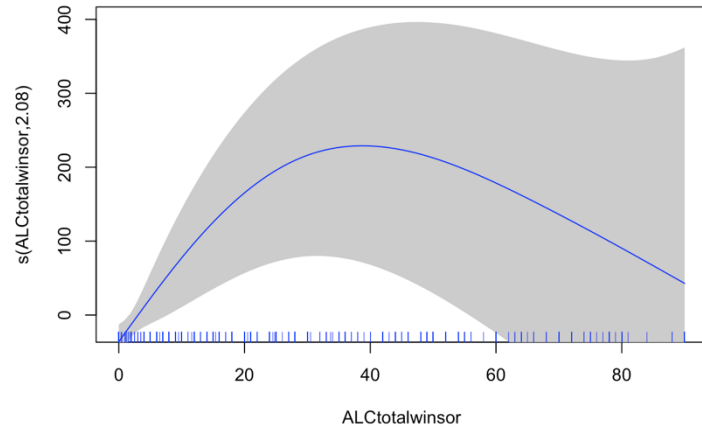

**B. Right supramarginal volume**

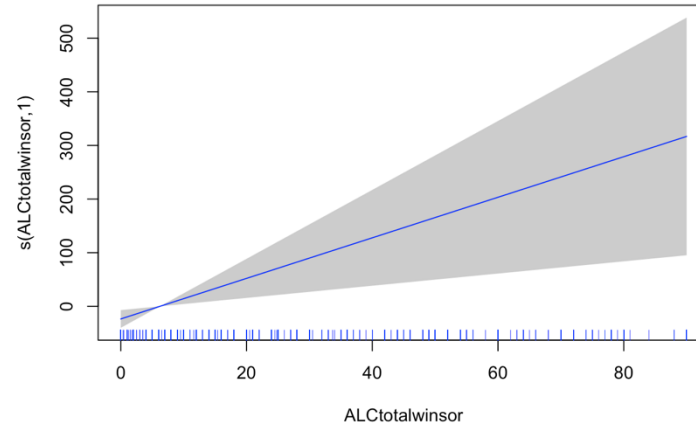

**C. Left inferior temporal volume**

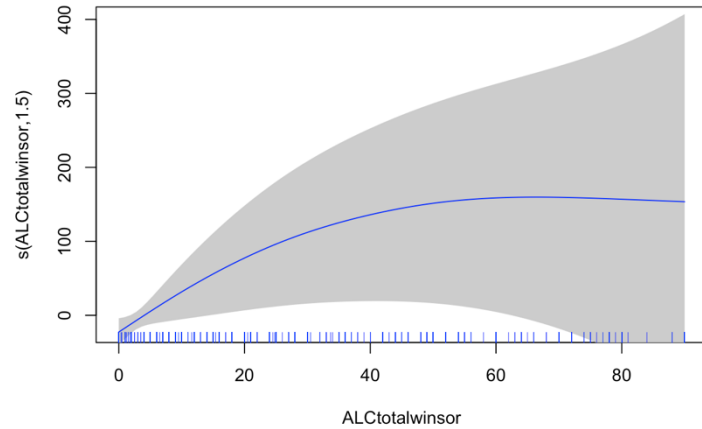

**D. Left middle temporal volume**

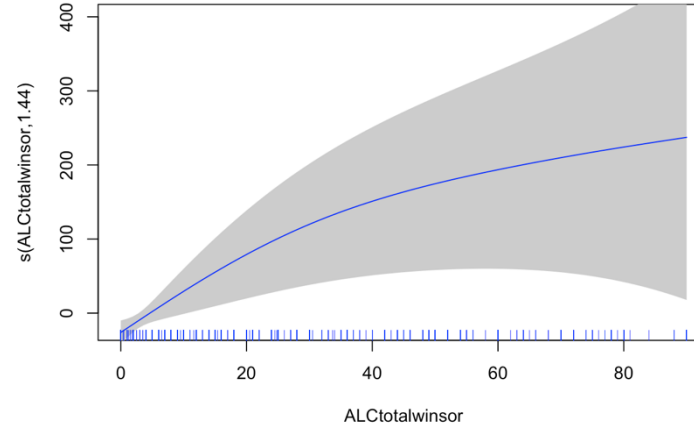

Figure S1 continued:

**E. Right middle temporal volume**

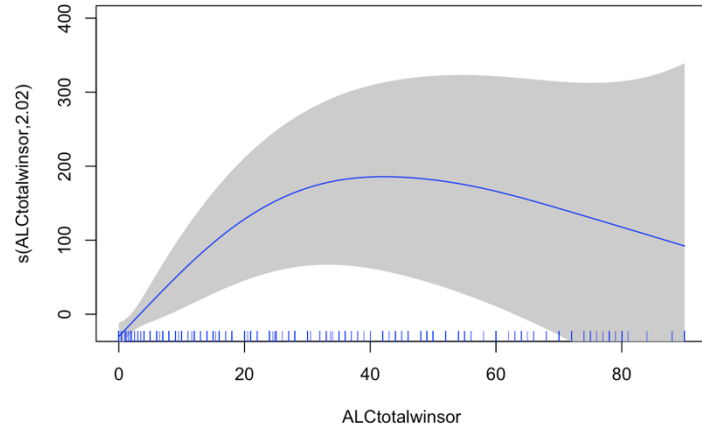

**F. Left lateral occipital volume**

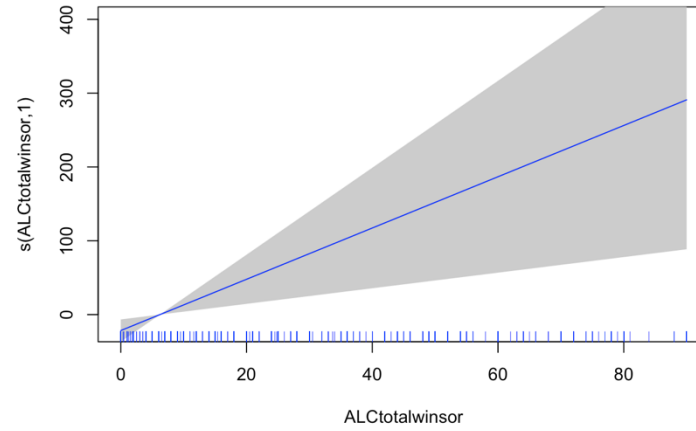

**G. Right precuneus surface area**

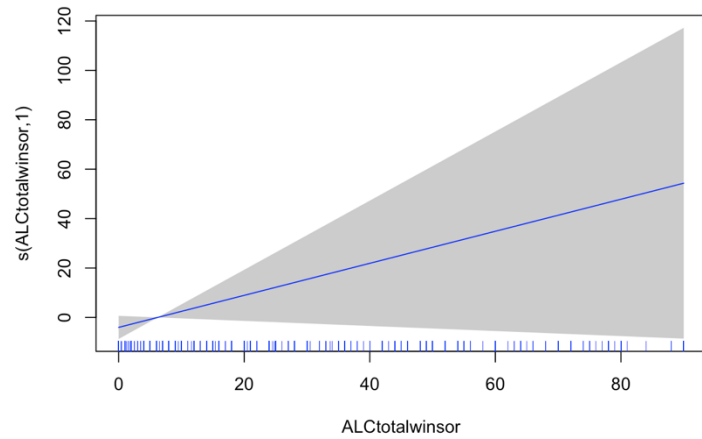

**H. Left Inferior temporal surface area**

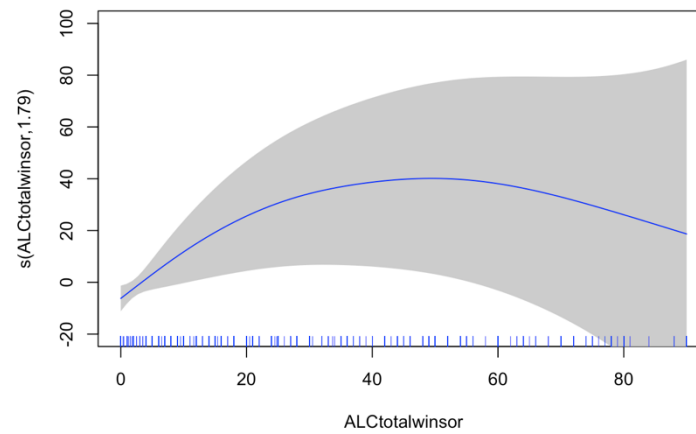

Figure S1 continued:

I. Left lateral occipital surface area

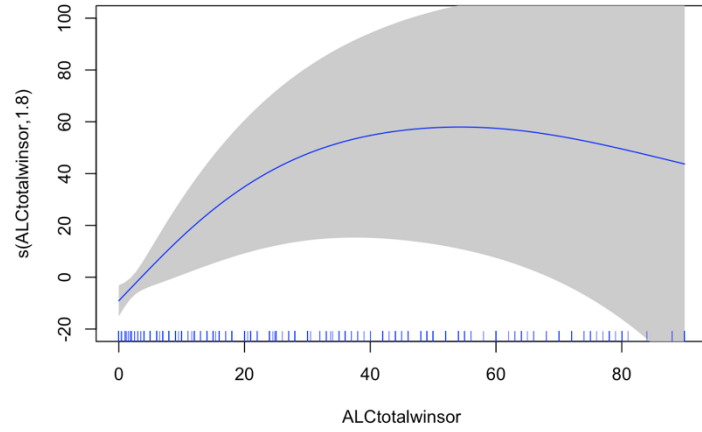



**Figure S2:** Data points on plot of total drinks consumed during pregnancy and total cerebral volume

**Total alcohol use during pregnancy on total cerebral volume**

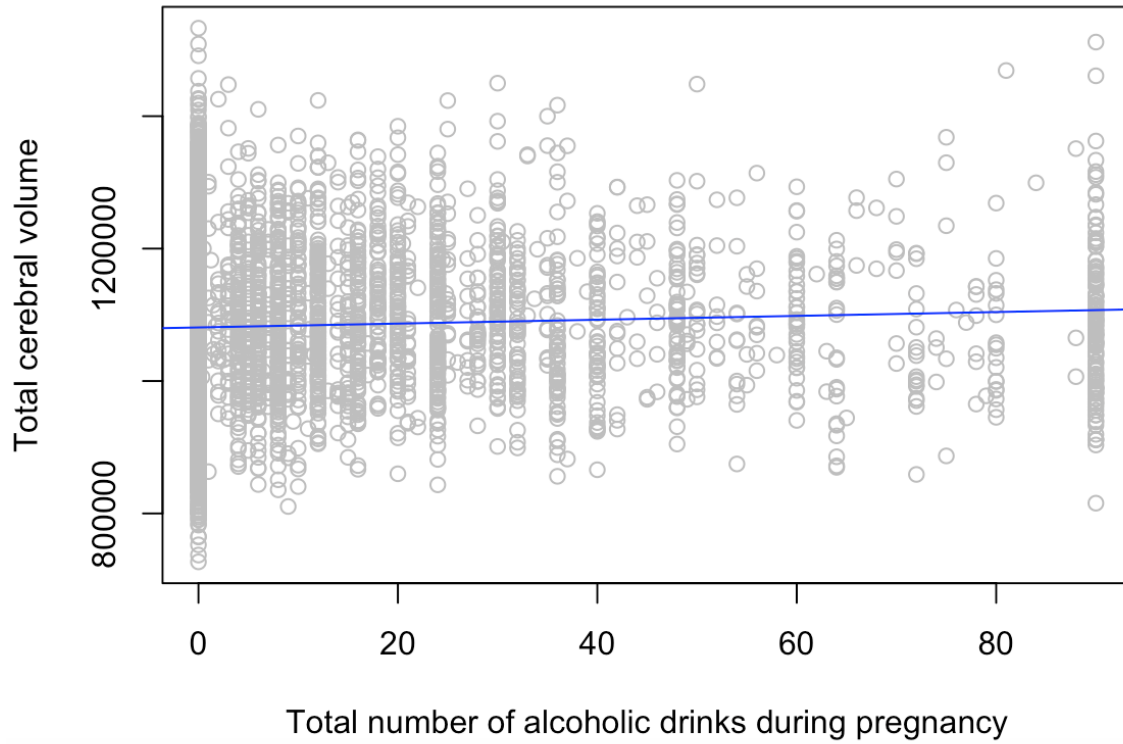

## Association of Prenatal Alcohol Exposure and Associated Outcomes

### **Exposure Pattern Analysis Results**

**Table S9:** Demographic, psychological, behavioral, and cognitive characteristics for unexposed, light reducers, stable light drinkers and heavier reducers.

|                                 | No prenatal alcohol exposure<br>n=6669 | Light reducer<br>n=1203 | Stable light<br>n=93 | Heavier reducer<br>n=755 | <i>p</i> |
|---------------------------------|----------------------------------------|-------------------------|----------------------|--------------------------|----------|
| Age (mean [SD])                 | 9.9 (0.6)                              | 9.9 (0.6)               | 9.9 (0.6)            | 9.9 (0.6)                | .82      |
| Sex (%)                         |                                        |                         |                      |                          | .24      |
| Female                          | 47.7                                   | 527.7                   | 48.0                 | 51.3                     |          |
| Male                            | 52.3                                   | 47.3                    | 52.0                 | 48.7                     |          |
| Race (%)                        |                                        |                         |                      |                          | <.001    |
| White                           | 51.4                                   | 81.7                    | 64.9                 | 68.9                     |          |
| Hispanic                        | 21.6                                   | 10.8                    | 15.5                 | 17.1                     |          |
| Black                           | 15.1                                   | 2.2                     | 8.4                  | 6.0                      |          |
| Asian                           | 1.8                                    | 0.0                     | 1.5                  | 0.4                      |          |
| Other                           | 10.1                                   | 5.4                     | 9.6                  | 7.7                      |          |
| Highest Parent Education (%)    |                                        |                         |                      |                          | <.001    |
| <HS Diploma                     | 7.2                                    | 0.0                     | 1.7                  | 1.5                      |          |
| HS Dip/GED                      | 11.2                                   | 3.2                     | 4.2                  | 6.1                      |          |
| Some College                    | 30.4                                   | 12.9                    | 21.9                 | 33.2                     |          |
| Bachelor                        | 28.0                                   | 34.4                    | 35.3                 | 30.6                     |          |
| Post Grad                       | 23.1                                   | 49.5                    | 36.7                 | 28.6                     |          |
| Birth weight (lbs [SD])         | 6.5 (1.5)                              | 6.7 (1.4)               | 6.9 (1.6)            | 6.6 (1.5)                | <.001    |
| Maternal age (mean [SD])        | 29.3 (6.2)                             | 30.9 (5.5)              | 33.5 (4.6)           | 29.4 (5.9)               | <.001    |
| Found out pregnant (weeks [SD]) | 6.9 (7.0)                              | 6.8 (5.6)               | 5.7 (4.4)            | 6.8 (5.1)                | .10      |
| Total drinks                    | 0.0 (0.0)                              | 15.8 (14.7)             | 44.0 (25.8)          | 36.2 (25.5)              |          |
| Maternal Depression (%)         |                                        |                         |                      |                          | <.001    |
| Yes                             | 21.2                                   | 22.6                    | 22.4                 | 29.1                     |          |
| No                              | 76.5                                   | 74.2                    | 74.9                 | 67.3                     |          |
| Unknown                         | 2.3                                    | 3.2                     | 2.7                  | 3.6                      |          |
| Born premature (%)              |                                        |                         |                      |                          | .14      |
| Yes                             | 79.5                                   | 81.7                    | 82.6                 | 80.1                     |          |
| No                              | 20.2                                   | 17.2                    | 17.2                 | 19.7                     |          |
| Unknown                         | 0.3                                    | 1.1                     | 0.2                  | 0.1                      |          |
| Tobacco exposure (%)            |                                        |                         |                      |                          | <.001    |
| Yes                             | 8.8                                    | 8.6                     | 15.0                 | 35.1                     |          |
| No                              | 91.0                                   | 91.4                    | 84.8                 | 63.8                     |          |
| Unknown                         | 0.2                                    | 0.0                     | 0.2                  | 1.1                      |          |
| Cannabis exposure (%)           |                                        |                         |                      |                          | <.001    |
| Yes                             | 2.8                                    | 9.7                     | 6.2                  | 18.4                     |          |
| No                              | 97.1                                   | 89.2                    | 92.7                 | 80.1                     |          |
| Unknown                         | 0.1                                    | 1.1                     | 1.1                  | 1.5                      |          |
| Heroin exposure (%)             |                                        |                         |                      |                          | .40      |
| Yes                             | 0.1                                    | 0.0                     | 0.0                  | 0.1                      |          |
| No                              | 99.9                                   | 100.0                   | 99.9                 | 99.6                     |          |
| Unknown                         | 0.0                                    | 0.0                     | 0.1                  | 0.3                      |          |
| Cocaine exposure (%)            |                                        |                         |                      |                          | <.001    |
| Yes                             | 0.1                                    | 0.0                     | 0.5                  | 1.3                      |          |
| No                              | 99.8                                   | 100.0                   | 99.3                 | 97.9                     |          |
| Unknown                         | 0.0                                    | 0.0                     | 0.2                  | 0.8                      |          |
| Impulsivity (m [SD])            |                                        |                         |                      |                          |          |
| Negative urgency                | 8.4 (2.6)                              | 8.6 (2.6)               | 8.1 (2.5)            | 8.6 (2.6)                | .04      |
| Positive urgency                | 8.0 (3.0)                              | 7.9 (2.9)               | 7.4 (2.8)            | 8.1 (2.9)                | .26      |
| Lack of planning                | 7.7 (2.4)                              | 8.0 (2.3)               | 8.0 (2.2)            | 7.8 (2.3)                | <.001    |
| Lack of perseverance            | 7.0 (2.3)                              | 7.1 (2.1)               | 7.3 (2.3)            | 7.1 (2.2)                | .28      |

## Association of Prenatal Alcohol Exposure and Associated Outcomes

|                                                                           | No prenatal alcohol exposure<br>n=6669 | Light reducer<br>n=1203 | Stable light<br>n=93 | Heavier reducer<br>n=755 | <i>p</i> |
|---------------------------------------------------------------------------|----------------------------------------|-------------------------|----------------------|--------------------------|----------|
| Sensation seeking                                                         | 9.7 (2.7)                              | 10.0 (2.5)              | 10.2 (2.7)           | 10.2 (2.7)               | <.001    |
| Emotional/behavioural problems (m [SD])                                   |                                        |                         |                      |                          |          |
| Total problems                                                            | 45.0 (11.3)                            | 46.2 (9.9)              | 47.5 (9.7)           | 48.1 (11.4)              | <.001    |
| Externalizing                                                             | 44.9 (10.1)                            | 45.7 (9.4)              | 46.3 (9.1)           | 47.3 (11.1)              | <.001    |
| Rule breaking behavior                                                    | 52.5 (4.6)                             | 52.3 (4.0)              | 51.9 (4.1)           | 53.5 (5.6)               | <.001    |
| Aggressive behavior                                                       | 52.5 (5.2)                             | 52.5 (4.6)              | 52.7 (3.9)           | 53.7 (6.6)               | <.001    |
| Internalizing                                                             | 48.0 (10.6)                            | 48.6 (9.9)              | 49.1 (10.2)          | 50.4 (10.9)              | <.001    |
| Anxious/Depressed                                                         | 53.3 (5.9)                             | 53.4 (5.4)              | 53.8 (6.4)           | 54.4 (6.6)               | .001     |
| Withdrawn/Depressed                                                       | 53.3 (5.9)                             | 53.0 (5.2)              | 52.9 (5.1)           | 54.1 (6.2)               | .001     |
| Somatic complaints                                                        | 54.7 (6.0)                             | 55.0 (5.8)              | 55.6 (6.5)           | 55.8 (6.5)               | <.001    |
| Social problems                                                           | 52.6 (4.6)                             | 53.7 (5.3)              | 52.4 (4.1)           | 53.2 (5.1)               | .009     |
| Thought problems                                                          | 53.5 (5.7)                             | 53.6 (5.3)              | 54.4 (5.9)           | 54.6 (6.4)               | <.001    |
| Attention problems                                                        | 53.6 (5.9)                             | 52.4 (4.1)              | 54.7 (6.1)           | 54.8 (7.1)               | <.001    |
| Past/presented mental disorders (%)                                       |                                        |                         |                      |                          |          |
| Depression                                                                | 2.8                                    | 2.3                     | 1.9                  | 3.6                      | .15      |
| Generalized Anxiety                                                       | 4.3                                    | 4.7                     | 4.4                  | 6.6                      | .03      |
| Panic                                                                     | 0.2                                    | 1.2                     | 0.3                  | 0.3                      | .44      |
| Separation Anxiety                                                        | 8.2                                    | 14.0                    | 11.8                 | 11.1                     | <.001    |
| Social Anxiety/Selective Mutism                                           | 4.9                                    | 5.8                     | 5.1                  | 5.4                      | .92      |
| Hallucinations                                                            | 0.4                                    | 1.2                     | 0.6                  | 0.7                      | .55      |
| Delusions                                                                 | 1.7                                    | 1.2                     | 1.7                  | 1.9                      | .95      |
| Attention Deficit Hyperactivity                                           | 19.0                                   | 24.4                    | 19.8                 | 26.5                     | <.001    |
| Oppositional Defiant Conduct                                              | 12.7                                   | 14.0                    | 15.0                 | 20.4                     | <.001    |
| Obsessive-Compulsive                                                      | 2.7                                    | 2.3                     | 2.7                  | 2.6                      | .99      |
| Unspecific Bipolar and Related Disorder                                   | 8.5                                    | 7.0                     | 9.3                  | 9.8                      | .52      |
| Post Traumatic Stress                                                     | 3.6                                    | 2.3                     | 3.1                  | 2.6                      | .47      |
| Specific Phobia                                                           | 1.7                                    | 1.2                     | 1.5                  | 2.8                      | .17      |
| Specific Phobia                                                           | 26.6                                   | 38.4                    | 28.1                 | 28.7                     | .05      |
| Motivation (m [SD])                                                       |                                        |                         |                      |                          |          |
| Behavioral inhibition                                                     | 5.5 (2.9)                              | 5.5 (2.7)               | 5.9 (2.9)            | 5.6 (2.8)                | .56      |
| Reward responsiveness                                                     | 8.8 (2.4)                              | 8.8 (2.4)               | 8.5 (2.3)            | 8.7 (2.3)                | .38      |
| Drive                                                                     | 4.1 (3.1)                              | 4.0 (3.0)               | 3.8 (3.1)            | 4.0 (3.0)                | .18      |
| Fun seeking                                                               | 5.7 (2.7)                              | 5.7 (2.5)               | 6.1 (2.8)            | 5.8 (2.5)                | .33      |
| NIH Toolbox fluid intelligence (m [SD])                                   |                                        |                         |                      |                          |          |
| Processing Speed (Pattern Comparison)                                     | 93.8 (22.0)                            | 94.6 (22.3)             | 97.5 (18.0)          | 94.2 (22.5)              | .33      |
| Working memory (List Sorting)                                             | 100.4 (14.5)                           | 102.8 (14.3)            | 105.9 (12.7)         | 103.4 (14.5)             | <.001    |
| Episodic memory (Picture Sequence)                                        | 101.2 (16.0)                           | 102.9 (16.3)            | 102.1 (16.1)         | 102.1 (16.4)             | .005     |
| Executive function / attention / inhibition (Flanker)                     | 95.2 (13.7)                            | 97.0 (13.0)             | 99.2 (13.0)          | 96.6 (13.1)              | <.001    |
| Executive function / cognitive flexibility (Dimensional Change Card Sort) | 96.5 (15.2)                            | 98.6 (15.1)             | 99.2 (14.4)          | 98.9 (15.7)              | <.001    |
| RAVLT (m [SD])                                                            |                                        |                         |                      |                          |          |
| Learning (Trials I-V avg)                                                 | 8.8 (2.0)                              | 9.2 (1.9)               | 8.9 (2.1)            | 9.1 (1.9)                | <.001    |
| Immediate delay (Trial VI)                                                | 9.7 (3.0)                              | 10.1 (2.9)              | 9.7 (3.1)            | 10.0 (2.9)               | <.001    |
| Long (30 min) delay (Trial VII)                                           | 9.1 (3.2)                              | 9.7 (3.0)               | 9.4 (3.4)            | 9.6 (3.1)                | <.001    |
| Cash Choice Task delayed gratification (%)                                | 58.4                                   | 61.0                    | 58.1                 | 58.6                     | .70      |

Association of Prenatal Alcohol Exposure and Associated Outcomes

**Table S10:** GAMM results for common patterns of alcohol exposure during pregnancy, when compared to unexposed youth.

|                                                                                    | <i>Light reducer</i><br>n=1203 |          | <i>Stable light</i><br>n=93 |          | <i>Heavier reducer</i><br>n=755 |          | <i>R</i> <sup>2</sup> |
|------------------------------------------------------------------------------------|--------------------------------|----------|-----------------------------|----------|---------------------------------|----------|-----------------------|
|                                                                                    | <i>B</i> (95% CI)              | <i>p</i> | <i>B</i> (95% CI)           | <i>p</i> | <i>B</i> (95% CI)               | <i>p</i> |                       |
| <b>CBCL</b>                                                                        |                                |          |                             |          |                                 |          |                       |
| Total problems                                                                     | 1.39 (0.72, 2.07)              | <.001    | 3.13 (0.94, 5.33)           | .005     | 1.82 (0.96, 2.68)               | <.001    | .136                  |
| Externalizing                                                                      | 1.06 (0.44, 1.69)              | <.001    | 2.18 (0.13, 4.22)           | .04      | 1.38 (0.59, 2.18)               | <.001    | .106                  |
| Internalizing                                                                      | 0.77 (0.11, 1.43)              | .02      | 1.51 (-0.66, 3.68)          | .17      | 1.56 (0.72, 2.41)               | <.001    | .076                  |
| Anxious Depressed                                                                  | 0.13 (-0.24, 0.51)             | .49      | 0.60 (-0.63, 1.83)          | .34      | 0.59 (0.11, 1.07)               | .02      | .050                  |
| Withdrawn                                                                          | -0.07 (-0.42, 0.29)            | .71      | 0.09 (-1.08, 1.25)          | .89      | 0.50 (0.05, 0.95)               | .03      | .070                  |
| Somatic                                                                            | 0.35 (-0.04, 0.74)             | .08      | 1.06 (-0.21, 2.33)          | .10      | 0.72 (0.23, 1.22)               | .004     | .041                  |
| Thought                                                                            | 0.20 (-0.16, 0.56)             | .28      | 0.97 (-0.21, 2.15)          | .11      | 0.44 (-0.02, 0.89)              | .06      | .076                  |
| Attention                                                                          | 0.17 (-0.18, 0.53)             | .34      | 1.40 (0.23, 2.57)           | .02      | 0.55 (0.10, 1.01)               | .02      | .167                  |
| Rule breaking                                                                      | 0.01 (-0.27, 0.29)             | .96      | 0.03 (-0.90, 0.95)          | .96      | 0.59 (0.23, 0.95)               | .001     | .111                  |
| Aggressive                                                                         | 0.05 (-0.28, 0.38)             | .75      | 0.47 (-0.61, 1.55)          | .40      | 0.57 (0.15, 0.99)               | .008     | .087                  |
| <b>KSADS</b>                                                                       |                                |          |                             |          |                                 |          |                       |
| Separation Anxiety                                                                 | 0.28 (0.17, 0.39)              | .008     | 0.41 (-0.09, 0.74)          | .20      | 0.05 (-0.19, 0.09)              | .71      | .025                  |
| Attention Deficit<br>Hyperactivity                                                 | 0.03 (-0.06, 0.12)             | .71      | 0.39 (0.01, 0.66)           | .15      | 0.22 (0.11, 0.32)               | .04      | .130                  |
| Oppositional Defiant<br>Disorder                                                   | 0.11 (0.01, 0.20)              | .26      | -0.01 (-0.33, 0.32)         | .99      | 0.26 (0.15, 0.37)               | .02      | .046                  |
| Specific Phobia                                                                    | 0.07 (0.00, 0.14)              | .34      | 0.56 (0.33, 0.79)           | .01      | -0.05 (-0.15, 0.04)             | .57      | .020                  |
| <b>UPPS-P</b>                                                                      |                                |          |                             |          |                                 |          |                       |
| Lack of planning                                                                   | 0.22 (0.07, 0.37)              | .004     | 0.25 (-0.25, 0.75)          | .32      | 0.06 (-0.13, 0.25)              | .53      | .029                  |
| Sensation seeking                                                                  | 0.13 (-0.05, 0.30)             | .15      | 0.40 (-0.17, 0.96)          | .17      | 0.30 (0.08, 0.52)               | .007     | .026                  |
| <b>BIS/BAS</b>                                                                     |                                |          |                             |          |                                 |          |                       |
| Fun seeking                                                                        | 0.11 (-0.06, 0.28)             | .20      | 0.64 (0.08, 1.20)           | .02      | 0.05 (-0.17, 0.26)              | .66      | .024                  |
| <b>NIH Toolbox</b>                                                                 |                                |          |                             |          |                                 |          |                       |
| Working memory (List<br>Sorting)                                                   | 0.50 (-0.37, 1.38)             | .26      | 1.96 (-0.92, 4.85)          | .18      | 2.12 (1.00, 3.23)               | <.001    | .152                  |
| Executive function /<br>attention / inhibition<br>(Flanker)                        | 0.84 (-0.02, 1.69)             | .06      | 2.95 (0.11, 5.78)           | .04      | 1.17 (0.07, 2.26)               | .04      | .051                  |
| Executive function /<br>cognitive flexibility<br>(Dimensional Change<br>Card Sort) | 0.85 (-0.10, 1.79)             | .08      | 0.57 (-2.57, 3.70)          | .72      | 2.01 (0.80, 3.22)               | .001     | .082                  |

## Association of Prenatal Alcohol Exposure and Associated Outcomes

|                                       | <i>Light reducer</i><br>n=1203 |                        | <i>Stable light</i><br>n=93  |                          | <i>Heavier reducer</i><br>n=755 |                        | <i>R</i> <sup>2</sup> |      |
|---------------------------------------|--------------------------------|------------------------|------------------------------|--------------------------|---------------------------------|------------------------|-----------------------|------|
|                                       | <i>B</i> (95% CI)              | <i>p</i>               | <i>B</i> (95% CI)            | <i>p</i>                 | <i>B</i> (95% CI)               | <i>p</i>               |                       |      |
| <b>RAVLT</b>                          |                                |                        |                              |                          |                                 |                        |                       |      |
| Learning                              | -0.55 (-1.24, 1.39)            | .12                    | -0.14 (-2.38, 2.11)          | .90                      | -0.12 (-0.21, 0.00)             | .006                   | .131                  |      |
| Immediate delay                       | 0.11 (-0.07, 0.29)             | .23                    | -0.52 (-1.12, 0.09)          | .09                      | 0.21 (-0.02, 0.44)              | .08                    | .131                  |      |
| Long (30 min) delay                   | 0.20 (0.01, 0.39)              | .04                    | -0.38 (-1.01, 0.26)          | .24                      | 0.30 (0.06, 0.55)               | .02                    | .138                  |      |
| <b>Brain Structure</b>                |                                |                        |                              |                          |                                 |                        |                       |      |
| <i>Volume</i>                         |                                |                        |                              |                          |                                 |                        |                       |      |
| Cerebrum                              | 7122.20 (1494.00, 12750.48)    | .01                    | 20544.50 (2551.57, 38537.43) | .03                      | 10844.80 (3754.16, 17935.39)    | .003                   | .338                  |      |
| Inferior parietal L                   | 263.04 (123.50, 402.57)        | .001                   | 710.07 (259.74, 1160.41)     | .01                      | 126.15 (-50.34, 302.63)         | .97                    | .149                  |      |
| Supramarginal R                       | 156.29 (36.90, 276.68)         | .07                    | 140.00 (-249.18, 529.18)     | .48                      | 162.21 (9.85, 314.56)           | .22                    | .134                  |      |
| Inferior temporal L                   | 209.35 (87.89, 330.81)         | .004                   | 219.71 (-172.90, 612.32)     | .27                      | 212.27 (58.62, 365.92)          | .02                    | .190                  |      |
| Middle temporal L                     | 162.54 (55.47, 269.19)         | .02                    | 134.14 (-210.88, 479.16)     | .45                      | 161.54 (26.35, 296.73)          | .12                    | .201                  |      |
|                                       | R                              | 160.87 (52.02, 269.73) | .02                          | 151.36 (-199.35, 502.06) | .40                             | 167.58 (29.96, 305.20) | .10                   | .251 |
| Lateral occipital L                   | 159.90 (49.77, 270.03)         | .03                    | 359.49 (3.96, 715.01)        | .29                      | 128.41 (-10.88, 267.71)         | .42                    | .245                  |      |
| <i>Surface area</i>                   |                                |                        |                              |                          |                                 |                        |                       |      |
| Precuneus R                           | 37.99 (2.85, 72.13)            | .09                    | 114.06 (3.82, 224.29)        | .13                      | 57.92 (14.77, 101.08)           | .03                    | .210                  |      |
| Inferior temporal L                   | 44.13 (13.48, 74.79)           | .01                    | 38.04 (-60.85, 136.93)       | .45                      | 63.9 (25.08, 102.64)            | .004                   | .192                  |      |
| Lateral occipital L                   | 47.53 (10.33, 84.73)           | .04                    | 104.57 (-15.36, 224.50)      | .26                      | 69.67 (21.62, 115.72)           | .01                    | .212                  |      |
| <b>Functional connectivity</b>        |                                |                        |                              |                          |                                 |                        |                       |      |
| Sensorimotor hand – salience          | 0.01 (0.00, 0.01)              | .008                   | 0.00 (-0.02, 0.02)           | .86                      | 0.01 (0.00, 0.02)               | .02                    | .006                  |      |
| Auditory – right ventral diencephalon | -0.01 (-0.02, 0.00)            | .002                   | -0.01 (-0.04, 0.01)          | .42                      | -0.01 (-0.02, 0.00)             | .20                    | .011                  |      |

Unstandardized regression coefficients and associated 95% confidence interval, p-value/false discovery rate adjusted p-value (for brain ROIs) and *R*<sup>2</sup> value are presented for generalized additive model results for common patterns of alcohol exposure during pregnancy, when compared to unexposed youth. Only brain ROIs identified from first series of analyses are presented. These generalized additive mixed models controlled for fixed (age, sex, race/ethnicity, birthweight, premature birth, maternal age at birth, highest parent education, maternal depression, other prenatal substance use, school grade) and random (family, scanner/site) effects.

N= 8720.

**PAE Sensitivity Analysis: Participant between group one-to-one matching on demographic characteristics.**

The dichotomous PAE groups were demographically matched after excluding all cases of rare phenotypes on which groups were mismatched, including other in utero substance use exposure and positive reports of maternal depression. All PAE association analyses were then repeated with this more homogenous subsample.

**Table S11: Sample Sizes**

|           | Unexposed | Exposed |
|-----------|-----------|---------|
| All       | 4,928     | 1,271   |
| Matched   | 1,271     | 1,271   |
| Unmatched | 3,657     | 0       |

**Table S12: Summary of balance for matched data**

|                 | Means Exposed | Means Unexposed | Mean Diff |
|-----------------|---------------|-----------------|-----------|
| Distance        | 0.25          | 0.25            | 0.00      |
| Race (white)    | 0.70          | 0.70            | 0.00      |
| Race (black)    | 0.05          | 0.06            | -0.01     |
| Race (Hispanic) | 0.15          | 0.15            | 0.00      |
| Race (Asian)    | 0.02          | 0.01            | 0.00      |
| Race (Other)    | 0.08          | 0.08            | 0.00      |
| Birth weight    | 6.72          | 6.78            | -0.05     |
| Maternal age    | 31.59         | 31.49           | 0.10      |
| <HS Diploma     | 0.03          | 0.02            | 0.00      |
| Some College    | 0.17          | 0.18            | 0.00      |
| Bachelor        | 0.37          | 0.38            | -0.01     |
| Post Grad       | 0.42          | 0.41            | 0.01      |

**Distribution of Propensity Scores**

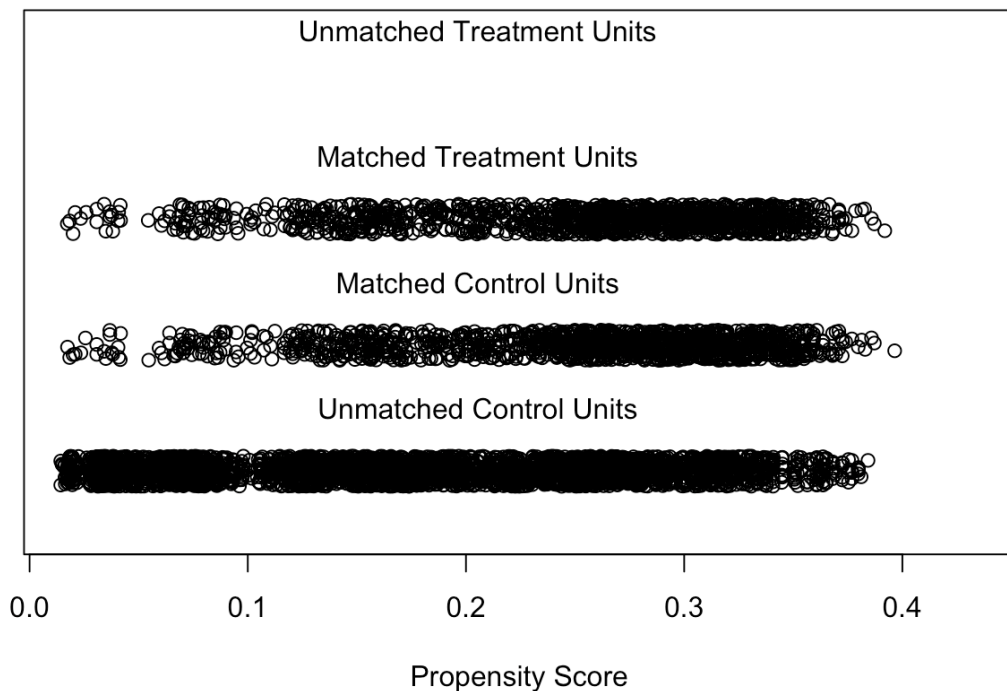

## Association of Prenatal Alcohol Exposure and Associated Outcomes

**Table S13:** Demographic characteristics that participants were matched one-to-one on for sensitivity analyses.

|                                  | <b>Unexposed</b><br>n=1,271 | <b>Exposed</b><br>n=1,271 | <i>p</i> |
|----------------------------------|-----------------------------|---------------------------|----------|
| Age (M [SD])                     | 9.9 (0.6)                   | 9.9 (0.6)                 | .38      |
| Sex (F; n [%])                   | 605 (47.6)                  | 631 (49.6)                | .32      |
| Race (n [%])                     |                             |                           | .95      |
| White                            | 894 (70.3)                  | 889 (69.9)                |          |
| Black                            | 71 (5.6)                    | 64 (5.0)                  |          |
| Hispanic                         | 186 (14.6)                  | 190 (14.9)                |          |
| Asian                            | 19 (1.5)                    | 21 (1.7)                  |          |
| Other                            | 101 (7.9)                   | 107 (8.4)                 |          |
| Born premature (n [%])           | 202 (15.9)                  | 211 (16.6)                | .53      |
| Birth weight (M [SD])            | 6.8 (1.3)                   | 6.7 (1.4)                 | .32      |
| Maternal age (M [SD])            | 31.5 (5.3)                  | 31.6 (5.2)                | .63      |
| Highest Parent Education (n [%]) |                             |                           | .92      |
| <HS Diploma                      | 13 (1.0)                    | 13 (1.0)                  |          |
| HS Dip/GED                       | 27 (2.1)                    | 32 (2.5)                  |          |
| Some College                     | 227 (17.9)                  | 222 (17.5)                |          |
| Bachelor                         | 483 (38.0)                  | 468 (36.8)                |          |
| Post Grad                        | 521 (41.0)                  | 536 (42.2)                |          |

## Association of Prenatal Alcohol Exposure and Associated Outcomes

**Table S14:** Sensitivity matched-participant analysis – GAMMs for any alcohol use (dichotomous variable) in pregnancy on all outcomes of interest.

|                                                       | <i>B</i> (95% CI)   | <i>p</i> | <i>R</i> <sup>2</sup> |
|-------------------------------------------------------|---------------------|----------|-----------------------|
| <b>CBCL</b>                                           |                     |          |                       |
| Total problems                                        | 2.28 (1.48, 3.09)   | <.001    | .021                  |
| Externalizing                                         | 1.64 (0.90, 2.37)   | <.001    | .018                  |
| Rule breaking behavior                                | 0.22 (-0.07, 0.50)  | .14      | .018                  |
| Aggressive behavior                                   | 0.23 (-0.11, 0.56)  | .19      | .007                  |
| Internalizing                                         | 1.45 (0.67, 2.33)   | <.001    | .007                  |
| Anxious/depressed                                     | 0.47 (0.04, 0.90)   | .03      | .002                  |
| Withdrawn/depressed                                   | 0.27 (-0.11, 0.64)  | .16      | .019                  |
| Somatic complaints                                    | 0.40 (-0.03, 0.83)  | .07      | .005                  |
| Social problems                                       | 0.16 (-0.13, 0.45)  | .28      | .012                  |
| Thought problems                                      | 0.54 (0.14, 0.93)   | .01      | .009                  |
| Attention problems                                    | 0.52 (0.12, 0.91)   | .01      | .017                  |
| <b>KSADS</b>                                          |                     |          |                       |
| Depression                                            | 0.08 (-0.57, 0.74)  | .80      | .008                  |
| Generalized Anxiety Disorder                          | 0.10 (-0.30, 0.51)  | .62      | .001                  |
| Panic Disorder                                        | 0.41 (-2.54, 3.35)  | .79      | -.012                 |
| Separation Anxiety                                    | 0.31 (0.02, 0.60)   | .03      | <.001                 |
| Social Anxiety/Selective Mutism Disorder              | -0.05 (-0.44, 0.34) | .81      | -.001                 |
| Hallucinations                                        | 0.16 (-0.86, 1.18)  | .76      | .004                  |
| Delusions                                             | -0.34 (-1.09, 0.41) | .36      | -.004                 |
| Attention Deficit Hyperactivity                       | 0.16 (-0.06, 0.38)  | .14      | .021                  |
| Oppositional Defiant Disorder                         | 0.25 (0.01, 0.49)   | .04      | .007                  |
| Conduct Disorder                                      | -0.02 (-0.61, 0.56) | .93      | .004                  |
| Obsessive-Compulsive Disorder                         | 0.16 (-0.14, 0.45)  | .30      | .006                  |
| Unspecific Bipolar and Related Disorder               | -0.07 (-0.58, 0.44) | .78      | .008                  |
| Post Traumatic Stress Disorder                        | -0.71 (-1.63, 0.21) | .13      | <.001                 |
| Specific Phobia                                       | 0.23 (0.03, 0.43)   | .02      | .001                  |
| <b>UPPS-P</b>                                         |                     |          |                       |
| Lack of planning                                      | 0.19 (0.02, 0.36)   | .03      | .021                  |
| Sensation seeking                                     | 0.29 (0.09, 0.49)   | .005     | .029                  |
| Negative urgency                                      | 0.15 (-0.05, 0.35)  | .13      | .008                  |
| Positive urgency                                      | 0.15 (-0.06, 0.37)  | .17      | .024                  |
| Lack of perseverance                                  | 0.07 (-0.10, 0.24)  | .40      | .014                  |
| <b>BIS/BAS</b>                                        |                     |          |                       |
| Behavioral inhibition                                 | 0.13 (-0.08, 0.35)  | .22      | .003                  |
| Reward responsiveness                                 | 0.04 (-0.14, 0.22)  | .63      | .025                  |
| Drive                                                 | 0.08 (-0.14, 0.31)  | .46      | .034                  |
| Fun seeking                                           | 0.17 (-0.02, 0.37)  | .09      | .011                  |
| <b>NIH Toolbox</b>                                    |                     |          |                       |
| Processing Speed (Pattern Comparison)                 | -0.15 (-1.86, 1.55) | .86      | .030                  |
| Working memory (List Sorting)                         | 0.61 (-0.48, 1.70)  | .27      | .052                  |
| Episodic memory (Picture Sequence)                    | 0.61 (-0.67, 1.89)  | .25      | .035                  |
| Executive function / attention / inhibition (Flanker) | 1.05 (-0.00, 2.10)  | .05      | .004                  |
| Executive function / cognitive flexibility            | 1.19 (-0.28, 2.41)  | .06      | .015                  |



## Association of Prenatal Alcohol Exposure and Associated Outcomes

|                                       |   | <i>B</i> (95% CI)           | <i>p</i> | <i>R</i> <sup>2</sup> |
|---------------------------------------|---|-----------------------------|----------|-----------------------|
| (Dimensional Change                   |   |                             |          |                       |
| Card Sort)                            |   |                             |          |                       |
| <b>RAVLT</b>                          |   |                             |          |                       |
| Learning                              |   | 0.04 (-0.11, 0.18)          | .60      | .111                  |
| Immediate delay                       |   | 0.02 (-0.20, 0.24)          | .85      | .080                  |
| Long (30 min) delay                   |   | 0.01 (-0.22, 0.24)          | .95      | .080                  |
| <b>Cash Choice Task</b>               |   | 0.09 (-0.07, 0.25)          | .27      | .010                  |
| <b>Brain Structure</b>                |   |                             |          |                       |
| <i>Volume</i>                         |   |                             |          |                       |
| Cerebrum                              |   | 9907.80 (3023.09, 16792.56) | .005     | .294                  |
| Inferior parietal                     | L | 245.92 (75.87, 415.97)      | .03      | .119                  |
| Supramarginal                         | R | 184.68 (36.07, 333.29)      | .08      | .104                  |
| Inferior temporal                     | L | 239.59 (90.34, 388.84)      | .01      | .142                  |
| Middle temporal                       | L | 140.83 (10.75, 270.90)      | .20      | .163                  |
|                                       | R | 58.52 (-74.76, 191.80)      | .39      | .205                  |
| Lateral occipital                     | L | 161.47 (23.59, 299.36)      | .13      | .177                  |
| <i>Surface area</i>                   |   |                             |          |                       |
| Precuneus                             | R | 82.12 (41.25, 122.98)       | <.001    | .167                  |
| Inferior temporal                     | L | 71.86 (33.58, 110.15)       | <.001    | .151                  |
| Lateral occipital                     | L | 52.70 (6.43, 98.97)         | .08      | .162                  |
| <b>Functional connectivity</b>        |   |                             |          |                       |
| Sensorimotor hand – salience          |   | 0.01 (0.00, 0.01)           | .24      | .008                  |
| Auditory – right ventral diencephalon |   | -0.13 (-0.02, 0.00)         | .01      | .006                  |

Unstandardized regression coefficients and associated 95% confidence interval, p-value/false discovery rate adjusted p-value (for brain analyses) and *R*<sup>2</sup> value are presented for generalised additive model results for alcohol use as a categorical measure. Only brain ROIs identified from first series of analyses are presented. These generalized additive mixed models controlled for fixed (age, sex, race/ethnicity, birthweight, premature birth, maternal age at birth, highest parent education, school grade) and random (family, scanner/site) effects.

## Association of Prenatal Alcohol Exposure and Associated Outcomes

**Table S15:** Sensitivity matched-participant analysis – GAMM results for alcohol use as a continuous measure, using an estimate of total drinks throughout pregnancy, when adjusting for fixed and random effects.

|                                                             | <i>B</i> (95% CI)   | <i>p</i> | <i>R</i> <sup>2</sup> |
|-------------------------------------------------------------|---------------------|----------|-----------------------|
| <b>CBCL</b>                                                 |                     |          |                       |
| Total problems                                              | 0.03 (0.00, 0.05)   | .02      | .054                  |
| Externalizing                                               | 0.02 (0.00, 0.05)   | .02      | .033                  |
| Rule breaking behavior                                      | 0.00 (-0.01, 0.01)  | .48      | .043                  |
| Aggressive behavior                                         | 0.01 (0.00, 0.02)   | .20      | .023                  |
| Internalizing                                               | 0.01 (-0.01, 0.04)  | .29      | .012                  |
| Anxious/depressed                                           | 0.00 (-0.01, 0.02)  | .71      | .019                  |
| Withdrawn/depressed                                         | 0.00 (-0.01, 0.01)  | .96      | .023                  |
| Somatic complaints                                          | 0.00 (-0.01, 0.02)  | .66      | .005                  |
| Social problems                                             | 0.00 (-0.01, 0.01)  | .98      | .054                  |
| Thought problems                                            | 0.01 (0.00, 0.02)   | .13      | .022                  |
| Attention problems                                          | 0.01 (0.00, 0.02)   | .04      | .119                  |
| <b>KSADS</b>                                                |                     |          |                       |
| Depression                                                  | 0.00 (-0.02, 0.02)  | .91      | .006                  |
| Generalized Anxiety Disorder                                | 0.00 (-0.01, 0.01)  | .67      | .009                  |
| Panic Disorder                                              | 0.13 (-0.05, 0.31)  | .14      | .429                  |
| Separation Anxiety                                          | 0.01 (0.00, 0.01)   | .13      | .005                  |
| Social Anxiety/Selective Mutism Disorder                    | 0.01 (-0.01, 0.02)  | .34      | -.003                 |
| Hallucinations                                              | 0.00 (-0.04, 0.04)  | .97      | .015                  |
| Delusions                                                   | 0.00 (-0.02, 0.02)  | .81      | .018                  |
| Attention Deficit Hyperactivity                             | 0.00 (0.00, 0.01)   | .16      | .114                  |
| Oppositional Defiant Disorder                               | 0.00 (0.00, 0.01)   | .34      | .013                  |
| Conduct Disorder                                            | -0.01 (-0.03, 0.01) | .44      | .034                  |
| Obsessive-Compulsive Disorder                               | 0.01 (0.00, 0.01)   | .10      | .007                  |
| Unspecific Bipolar and Related Disorder                     | 0.00 (-0.02, 0.01)  | .60      | .004                  |
| Post Traumatic Stress Disorder                              | 0.00 (-0.04, 0.03)  | .63      | .028                  |
| Specific Phobia                                             | 0.00 (-0.01, 0.00)  | .47      | .003                  |
| <b>UPPS-P</b>                                               |                     |          |                       |
| Lack of planning                                            | 0.00 (0.00, 0.01)   | .56      | .018                  |
| Sensation seeking                                           | 0.01 (0.00, 0.02)   | .002     | .028                  |
| Negative urgency                                            | 0.00 (0.00, 0.01)   | .13      | .012                  |
| Positive urgency                                            | 0.00 (0.00, 0.01)   | .27      | .035                  |
| Lack of perseverance                                        | 0.00 (0.00, 0.00)   | .99      | .039                  |
| <b>BIS/BAS</b>                                              |                     |          |                       |
| Behavioral inhibition                                       | 0.01 (0.00, 0.01)   | .02      | .006                  |
| Reward responsiveness                                       | 0.00 (0.00, 0.01)   | .49      | .033                  |
| Drive                                                       | 0.00 (-0.01, 0.01)  | .78      | .045                  |
| Fun seeking                                                 | 0.01 (0.00, 0.01)   | .09      | .014                  |
| <b>NIH Toolbox</b>                                          |                     |          |                       |
| Processing Speed<br>(Pattern Comparison)                    | 0.03 (-0.02, 0.08)  | .30      | .045                  |
| Working memory (List<br>Sorting)                            | 0.00 (-0.03, 0.04)  | .80      | .090                  |
| Episodic memory<br>(Picture Sequence)                       | 0.00 (-0.04, 0.04)  | .94      | .062                  |
| Executive function /<br>attention / inhibition<br>(Flanker) | 0.05 (0.02, 0.08)   | .002     | .020                  |
| Executive function /<br>cognitive flexibility               | 0.03 (0.00, 0.07)   | .06      | .042                  |

## Association of Prenatal Alcohol Exposure and Associated Outcomes

|                                       |   | <i>B</i> (95% CI)       | <i>p</i> | <i>R</i> <sup>2</sup> |
|---------------------------------------|---|-------------------------|----------|-----------------------|
| (Dimensional Change                   |   |                         |          |                       |
| Card Sort)                            |   |                         |          |                       |
| <b>RAVLT</b>                          |   |                         |          |                       |
| Learning                              |   | 0.00 (-0.01, 0.00)      | .37      | .140                  |
| Immediate delay                       |   | 0.00 (-0.01, 0.00)      | .26      | .100                  |
| Long (30 min) delay                   |   | 0.00 (-0.01, 0.00)      | .18      | .099                  |
| <b>Cash Choice Task</b>               |   | 0.00 (0.00, 0.01)       | .16      | .005                  |
| <b>Brain Structure</b>                |   |                         |          |                       |
| <i>Volume</i>                         |   |                         |          |                       |
| Cerebrum                              |   | 119.10 (-87.73, 325.88) | .26      | .30                   |
| Inferior parietal                     | L | 2.71 (-2.47, 7.89)      | .17      | .117                  |
| Supramarginal                         | R | 1.76 (-2.74, 6.27)      | .56      | .102                  |
| Inferior temporal                     | L | 0.95 (-3.64, 5.55)      | .29      | .144                  |
| Middle temporal                       | L | 2.28 (-1.63, 6.19)      | .63      | .156                  |
|                                       | R | -0.99 (-5.01, 3.04)     | .55      | .189                  |
| Lateral occipital                     | L | 6.56 (2.45, 10.66)      | .01      | .186                  |
| <i>Surface area</i>                   |   |                         |          |                       |
| Precuneus                             | R | 0.20 (-1.05, 1.45)      | .75      | .157                  |
| Inferior temporal                     | L | 0.24 (-0.92, 1.41)      | .26      | .150                  |
| Lateral occipital                     | L | 1.55 (0.19, 2.92)       | .08      | .176                  |
| <b>Functional connectivity</b>        |   |                         |          |                       |
| Sensorimotor hand – salience          |   | 0.00 (0.00, 0.00)       | .15      | .006                  |
| Auditory – right ventral diencephalon |   | 0.00 (0.00, 0.00)       | .23      | .006                  |

Unstandardized regression coefficients and associated 95% confidence interval, p-value/false discovery rate adjusted p-value (for brain analyses) and *R*<sup>2</sup> value are presented for generalised additive model results for alcohol use as a continuous measure. Only brain ROIs identified from first series of analyses are presented. These generalized additive mixed models controlled for fixed (age, sex, race/ethnicity, birthweight, premature birth, maternal age at birth, highest parent education, school grade) and random (family, scanner/site) effects.

Association of Prenatal Alcohol Exposure and Associated Outcomes

**Table S16:** Sensitivity matched-participant analysis – GAMM results for common patterns of alcohol exposure during pregnancy compared to no exposure, when adjusting for fixed and random effects.

|                                                       | <i>Light reducer</i><br>n=729 |          | <i>Stable light</i><br>n=53 |          | <i>Heavier reducer</i><br>n=284 |          | <i>R</i> <sup>2</sup> |
|-------------------------------------------------------|-------------------------------|----------|-----------------------------|----------|---------------------------------|----------|-----------------------|
|                                                       | <i>B</i> (95% CI)             | <i>p</i> | <i>B</i> (95% CI)           | <i>p</i> | <i>B</i> (95% CI)               | <i>p</i> |                       |
| <b>CBCL</b>                                           |                               |          |                             |          |                                 |          |                       |
| Total problems                                        | 1.69 (0.73, 2.64)             | <.001    | 5.06 (2.33, 7.78)           | <.001    | 3.18 (1.85, 4.51)               | <.001    | .066                  |
| Externalizing                                         | 1.40 (0.52, 2.27)             | .002     | 3.79 (1.28, 6.30)           | .003     | 2.19 (0.98, 3.41)               | <.001    | .047                  |
| Internalizing                                         | 0.64 (-0.32, 1.59)            | .19      | 3.17 (0.44, 5.91)           | .02      | 1.84 (0.51, 3.16)               | .007     | .013                  |
| Anxious Depressed                                     | 0.06 (-0.48, 0.59)            | .84      | 1.48 (-0.05, 3.02)          | .06      | 0.51 (-0.23, 1.26)              | .18      | .017                  |
| Withdrawn                                             | 0.04 (-0.39, 0.47)            | .86      | 0.60 (-0.66, 1.86)          | .35      | 0.24 (-0.36, 0.84)              | .44      | .025                  |
| Somatic                                               | 0.14 (-0.39, 0.66)            | .62      | 1.42 (-0.09, 2.94)          | .07      | 0.59 (-0.14, 1.32)              | .12      | .006                  |
| Thought                                               | 0.23 (-0.24, 0.70)            | .34      | 1.45 (0.08, 2.82)           | .04      | 0.36 (-0.30, 1.01)              | .29      | .026                  |
| Attention                                             | 0.06 (-0.40, 0.52)            | .79      | 2.27 (0.94, 3.61)           | <.001    | 0.79 (0.14, 1.42)               | .02      | .137                  |
| Rule breaking                                         | 0.16 (-0.17, 0.49)            | .35      | 0.10 (-0.86, 1.06)          | .84      | 0.53 (0.07, 0.99)               | .03      | .043                  |
| Aggressive                                            | 0.10 (-0.29, 0.50)            | .61      | 0.79 (-0.35, 1.94)          | .18      | 0.64 (0.09, 1.19)               | .02      | .032                  |
| <b>KSADS</b>                                          |                               |          |                             |          |                                 |          |                       |
| Depression                                            | 0.27 (-0.67, 1.21)            | .58      | 1.69 (0.05, 3.35)           | .04      | 0.70 (-0.44, 1.84)              | .22      | .015                  |
| Separation Anxiety                                    | 0.34 (0.01, 0.67)             | .05      | 0.98 (0.22, 1.74)           | .01      | 0.17 (-0.32, 0.66)              | .48      | .011                  |
| Attention Deficit                                     | 0.07 (-0.20, 0.34)            | .64      | 0.79 (0.21, 1.48)           | .02      | 0.41 (0.06, 0.76)               | .03      | .119                  |
| Hyperactivity                                         |                               |          |                             |          |                                 |          |                       |
| Oppositional Defiant Disorder                         | 0.37 (0.08, 0.66)             | .01      | 0.45 (-0.35, 1.25)          | .26      | 0.38 (-0.01, 0.77)              | .06      | .021                  |
| Specific Phobia                                       | 0.25 (0.01, 0.49)             | .03      | 0.82 (0.23, 1.41)           | .007     | 0.22 (-0.02, 0.46)              | .18      | .007                  |
| <b>UPPS-P</b>                                         |                               |          |                             |          |                                 |          |                       |
| Lack of planning                                      | 0.27 (0.06, 0.48)             | .01      | 0.32 (-0.30, 0.94)          | .31      | 0.21 (-0.09, 0.50)              | .17      | .029                  |
| Sensation seeking                                     | 0.29 (0.04, 0.54)             | .02      | 0.62 (-0.08, 1.33)          | .08      | 0.40 (0.56, 0.74)               | .02      | .033                  |
| <b>BIS/BAS</b>                                        |                               |          |                             |          |                                 |          |                       |
| Behavioral inhibition                                 | 0.00 (-0.26, 0.25)            | .98      | 1.10 (0.35, 1.85)           | .004     | 0.09 (-0.27, 0.45)              | .64      | .011                  |
| Fun seeking                                           | 0.03 (-0.20, 0.27)            | .77      | 0.56 (-0.12, 1.25)          | .11      | -0.01 (-0.33, 0.32)             | .97      | .013                  |
| <b>NIH Toolbox</b>                                    |                               |          |                             |          |                                 |          |                       |
| Working memory (List Sorting)                         | 0.23 (-1.08, 1.54)            | .73      | 1.76 (-2.01, 5.53)          | .36      | 2.45 (0.63, 4.28)               | .008     | .076                  |
| Executive function / attention / inhibition (Flanker) | 1.38 (0.13, 2.63)             | .03      | 3.24 (-0.37, 6.85)          | .08      | 1.30 (-0.46, 3.04)              | .14      | .025                  |

## Association of Prenatal Alcohol Exposure and Associated Outcomes

|                                                                                    | <i>Light reducer</i><br>n=729 |                         | <i>Stable light</i><br>n=53 |                          | <i>Heavier reducer</i><br>n=284 |                         | <i>R</i> <sup>2</sup> |      |
|------------------------------------------------------------------------------------|-------------------------------|-------------------------|-----------------------------|--------------------------|---------------------------------|-------------------------|-----------------------|------|
|                                                                                    | <i>B</i> (95% CI)             | <i>p</i>                | <i>B</i> (95% CI)           | <i>p</i>                 | <i>B</i> (95% CI)               | <i>p</i>                |                       |      |
| Executive function /<br>cognitive flexibility<br>(Dimensional Change<br>Card Sort) | 0.53 (-0.92, 1.98)            | .47                     | 0.04 (-4.13, 4.21)          | .99                      | 3.00 (0.98, 5.01)               | .004                    | .050                  |      |
| <b>RAVLT</b>                                                                       |                               |                         |                             |                          |                                 |                         |                       |      |
| Learning                                                                           | 0.06 (-0.11, 0.23)            | .47                     | -0.42 (-0.91, 0.07)         | .09                      | 0.14 (-0.09, 0.38)              | .24                     | .144                  |      |
| Immediate delay                                                                    | 0.07 (-0.19, 0.33)            | .59                     | -0.53 (-1.28, 0.22)         | .17                      | 0.20 (-0.16, 0.57)              | .27                     | .100                  |      |
| Long (30 min) delay                                                                | 0.19 (-0.09, 0.46)            | .19                     | -0.67 (-1.46, 0.13)         | .10                      | 0.18 (-0.20, 0.57)              | .35                     | .101                  |      |
| <b>Brain Structure</b>                                                             |                               |                         |                             |                          |                                 |                         |                       |      |
| <i>Volume</i>                                                                      |                               |                         |                             |                          |                                 |                         |                       |      |
| Cerebrum                                                                           | 9352.00 (656.26, 18047.73)    | .04                     | 24635.00 (40.81, 49229.23)  | .05                      | 15876.20 (4162.20, 27590.29)    | .008                    | .323                  |      |
| Inferior parietal L                                                                | 323.23 (101.08, 545.38)       | .02                     | 903.49 (271.87, 1535.10)    | .03                      | 130.89 (-169.62, 431.39)        | .39                     | .130                  |      |
| Supramarginal R                                                                    | 213.99 (21.57, 406.41)        | .17                     | 286.49 (-258.33, 831.31)    | .30                      | 325.93 (65.66, 586.18)          | .08                     | .112                  |      |
| Inferior temporal L                                                                | 357.24 (165.48, 549.00)       | <.001                   | 130.87 (-414.95, 676.69)    | .64                      | 335.42 (75.96, 594.88)          | .03                     | .160                  |      |
| Middle temporal L                                                                  | 124.99 (-40.11, 290.09)       | .84                     | 176.03 (-291.57, 643.64)    | .46                      | 160.92 (-62.17, 384.02)         | .16                     | .163                  |      |
|                                                                                    | R                             | 125.11 (-45.34, 295.56) | .90                         | 118.81 (-363.73, 601.35) | .63                             | 142.86 (-87.53, 373.25) | .22                   | .200 |
| Lateral occipital L                                                                | 213.64 (39.75, 387.53)        | .10                     | 612.93 (117.37, 1108.49)    | .09                      | 303.41 (68.06, 538.75)          | .07                     | .209                  |      |
| <i>Surface area</i>                                                                |                               |                         |                             |                          |                                 |                         |                       |      |
| Precuneus R                                                                        | 72.69 (20.69, 124.70)         | .02                     | 140.18 (-8.87, 289.24)      | .20                      | 59.04 (-11.47, 129.56)          | .30                     | .186                  |      |
| Inferior temporal L                                                                | 98.18 (48.91, 147.44)         | <.001                   | 47.62 (-91.45, 186.69)      | .50                      | 100.82 (34.25, 167.40)          | .009                    | .163                  |      |
| Lateral occipital L                                                                | 63.51 (4.53, 122.48)          | .10                     | 213.62 (47.20, 380.05)      | .04                      | 117.85 (38.13, 197.57)          | .01                     | .190                  |      |
| <b>Functional connectivity</b>                                                     |                               |                         |                             |                          |                                 |                         |                       |      |
| Sensorimotor hand – salience                                                       | 0.01 (-0.03, 0.05)            | .31                     | -0.02 (-0.06, 0.02)         | .30                      | 0.02 (0.00, 0.04)               | .02                     | .009                  |      |
| Auditory – right ventral<br>diencephalon                                           | -0.01 (-0.02, 0.00)           | .04                     | 0.00 (-0.04, 0.04)          | .89                      | 0.00 (-0.02, 0.01)              | .42                     | .007                  |      |

<sup>a</sup>Unstandardized regression coefficients and associated 95% confidence interval, p-value/false discovery rate adjusted p-value (for brain ROIs) and *R*<sup>2</sup> value are presented for generalized additive model results for common patterns of alcohol exposure during pregnancy, when compared to unexposed youth. Only brain ROIs identified from first series of analyses are presented. These generalized additive mixed models controlled for fixed (age, sex, race/ethnicity, birthweight, premature birth, maternal age at birth, highest parent education, school grade) and random (family, scanner/site) effects. N= 1908.

**Multilevel Mediation Analysis: Cross-sectional baseline analysis to examine associations between PAE, brain structure, and psychological, behavioral, and cognitive outcomes. (Tables S17-S31).**

All multilevel mediation models controlled for fixed (age, sex, race/ethnicity, birthweight, premature birth, maternal age at birth, highest parent education, maternal depression, other prenatal substance use, school grade), and random (family, scanner/site) effects.

**Table S17: Mediation Analyses – CBCL Total Problems**

|                                       | PAE → Brain (A)      |       | Brain → Total Problems (B) |       | Overall Indirect Effect (A*B) |       | Direct Effect: PAE → Total Problems (C) |       | Total Effect      |       |
|---------------------------------------|----------------------|-------|----------------------------|-------|-------------------------------|-------|-----------------------------------------|-------|-------------------|-------|
|                                       | B (95% CI)           | p     | B (95% CI)                 | p     | B (95% CI)                    | p     | B (95% CI)                              | p     | B (95% CI)        | p     |
| <b>Brain Structure</b>                |                      |       |                            |       |                               |       |                                         |       |                   |       |
| <b>Volume</b>                         |                      |       |                            |       |                               |       |                                         |       |                   |       |
| Cerebrum                              | 39.43 (24.62, 51.22) | <.001 | -0.002 (-0.003, -0.001)    | <.001 | -0.08 (-0.12, -0.04)          | <.001 | 1.53 (1.20, 2.12)                       | <.001 | 1.44 (1.11, 2.05) | <.001 |
| Inferior temporal L                   | 2.87 (1.91, 3.63)    | <.001 | -0.02 (-0.03, -0.01)       | <.001 | -0.05 (-0.09, -0.02)          | <.001 | 1.50 (1.18, 2.09)                       | <.001 | 1.44 (1.11, 2.05) | <.001 |
| Middle temporal L                     | 2.23 (1.39, 2.90)    | <.001 | -0.02 (-0.04, -0.01)       | <.001 | -0.05 (-0.09, -0.02)          | <.001 | 1.50 (1.18, 2.09)                       | <.001 | 1.44 (1.11, 2.05) | <.001 |
| Middle temporal R                     | 2.30 (1.44, 2.99)    | <.001 | -0.03 (-0.04, -0.01)       | <.001 | -0.06 (-0.09, -0.02)          | <.001 | 1.50 (1.18, 2.10)                       | <.001 | 1.44 (1.11, 2.05) | <.001 |
| Lateral occipital L                   | 2.18 (1.29, 2.88)    | <.001 | -0.02 (-0.03, -0.01)       | <.001 | -0.03 (-0.07, -0.01)          | <.001 | 1.48 (1.16, 2.08)                       | <.001 | 1.44 (1.11, 2.05) | <.001 |
| Inferior parietal L                   | 2.22 (1.15, 3.08)    | <.001 | -0.02 (-0.04, -0.02)       | <.001 | -0.05 (-0.9, -0.02)           | <.001 | 1.50 (1.18, 2.09)                       | <.001 | 1.44 (1.11, 2.05) | <.001 |
| Supramarginal R                       | 1.94 (1.01, 2.69)    | <.001 | -0.02 (-0.04, -0.01)       | <.001 | -0.04 (-0.07, -0.01)          | <.001 | 1.49 (1.17, 2.08)                       | <.001 | 1.44 (1.11, 2.05) | <.001 |
| <b>Surface area</b>                   |                      |       |                            |       |                               |       |                                         |       |                   |       |
| Inferior temporal L                   | 0.77 (0.53, 0.97)    | <.001 | -0.06 (-0.12, -0.02)       | <.001 | -0.05 (-0.09, -0.02)          | <.001 | 1.50 (1.17, 2.09)                       | <.001 | 1.44 (1.11, 2.05) | <.001 |
| Lateral occipital L                   | 0.93 (0.63, 1.17)    | <.001 | -0.07 (-0.12, -0.04)       | <.001 | -0.06 (-0.11, -0.03)          | <.001 | 1.52 (1.19, 2.11)                       | <.001 | 1.44 (1.11, 2.05) | <.001 |
| Precuneus R                           | 0.57 (0.31, 0.78)    | <.001 | -0.07 (-0.12, -0.04)       | <.001 | -0.04 (-0.08, -0.01)          | <.001 | 1.49 (1.17, 2.08)                       | <.001 | 1.44 (1.11, 2.05) | <.001 |
| <b>Functional connectivity</b>        |                      |       |                            |       |                               |       |                                         |       |                   |       |
| Sensorimotor hand – salience          | 0.01 (0.00, 0.01)    | .02   | 0.09 (-2.27, 2.15)         | .48   | 0.00 (-0.02, 0.02)            | .48   | 1.35 (0.99, 2.01)                       | <.001 | 1.35 (0.98, 2.02) | <.001 |
| Auditory – right ventral diencephalon | -0.01 (-0.02, -0.01) | <.001 | -0.50 (-2.50, 1.11)        | .28   | 0.01 (-0.02, 0.03)            | .28   | 1.34 (0.98, 2.00)                       | <.001 | 1.36 (1.00, 2.00) | <.001 |

## Association of Prenatal Alcohol Exposure and Associated Outcomes

**Table S18: CBCL Externalizing Psychopathology**

|                                       | PAE → Brain (A)      |       | Brain → Externalizing Symptoms (B) |       | Overall Indirect Effect (A*B) |       | Direct Effect: PAE → Externalizing Symptoms (C) |       | Total Effect      |       |
|---------------------------------------|----------------------|-------|------------------------------------|-------|-------------------------------|-------|-------------------------------------------------|-------|-------------------|-------|
|                                       | B (95% CI)           | p     | B (95% CI)                         | p     | B (95% CI)                    | p     | B (95% CI)                                      | p     | B (95% CI)        | p     |
| <b>Brain Structure</b>                |                      |       |                                    |       |                               |       |                                                 |       |                   |       |
| <i>Volume</i>                         |                      |       |                                    |       |                               |       |                                                 |       |                   |       |
| Cerebrum                              | 39.95 (25.39, 51.6)  | <.001 | -0.002 (-0.003, -0.001)            | <.001 | -0.08 (-0.12, -0.05)          | <.001 | 1.13 (0.84, 1.67)                               | <.001 | 1.05 (0.74, 1.60) | <.001 |
| Inferior temporal L                   | 2.93 (1.99, 3.68)    | <.001 | -0.02 (-0.03, -0.01)               | <.001 | -0.06 (-0.10, -0.03)          | <.001 | 1.11 (0.82, 1.65)                               | <.001 | 1.05 (0.74, 1.60) | <.001 |
| Middle temporal L                     | 2.20 (1.37, 2.87)    | <.001 | -0.03 (-0.04, -0.02)               | <.001 | -0.06 (-0.10, -0.03)          | <.001 | 1.12 (0.83, 1.66)                               | <.001 | 1.05 (0.74, 1.60) | <.001 |
| Middle temporal R                     | 2.23 (1.37, 2.91)    | <.001 | -0.03 (-0.05, -0.02)               | <.001 | -0.07 (-0.11, -0.04)          | <.001 | 1.13 (0.83, 1.67)                               | <.001 | 1.04 (0.74, 1.60) | <.001 |
| Lateral occipital L                   | 2.10 (1.23, 2.79)    | <.001 | -0.02 (-0.04, -0.01)               | <.001 | -0.04 (-0.08, -0.02)          | <.001 | 1.10 (0.81, 1.64)                               | <.001 | 1.05 (0.75, 1.60) | <.001 |
| Inferior parietal L                   | 2.12 (1.06, 2.97)    | <.001 | -0.02 (-0.03, -0.02)               | <.001 | -0.05 (-0.08, -0.02)          | <.001 | 1.10 (0.81, 1.64)                               | <.001 | 1.05 (0.75, 1.60) | <.001 |
| Supramarginal R                       | 1.88 (0.96, 2.61)    | <.001 | -0.02 (-0.04, -0.02)               | <.001 | -0.04 (-0.8, -0.02)           | <.001 | 1.10 (0.81, 1.64)                               | <.001 | 1.05 (0.75, 1.60) | <.001 |
| <i>Surface area</i>                   |                      |       |                                    |       |                               |       |                                                 |       |                   |       |
| Inferior temporal L                   | 0.79 (0.55, 0.99)    | <.001 | -0.09 (-0.13, -0.51)               | <.001 | -0.07 (-0.11, -0.03)          | <.001 | 1.12 (0.83, 1.66)                               | <.001 | 1.05 (0.74, 1.60) | <.001 |
| Lateral occipital L                   | 0.93 (0.63, 1.17)    | <.001 | -0.08 (-0.12, -0.52)               | <.001 | -0.07 (-0.12, -0.04)          | <.001 | 1.13 (0.83, 1.67)                               | <.001 | 1.05 (0.74, 1.60) | <.001 |
| Precuneus R                           | 0.60 (0.34, 0.81)    | <.001 | -0.07 (-0.12, -0.04)               | <.001 | -0.05 (-0.08, -0.02)          | <.001 | 1.10 (0.81, 1.64)                               | <.001 | 1.05 (0.75, 1.60) | <.001 |
| <b>Functional connectivity</b>        |                      |       |                                    |       |                               |       |                                                 |       |                   |       |
| Sensorimotor hand – salience          | 0.01 (0.00, 0.01)    | .02   | -0.85 (-2.98, 1.02)                | .16   | -0.01 (-0.02, 0.01)           | .18   | 1.07 (0.74, 1.67)                               | <.001 | 1.06 (0.73, 1.67) | <.001 |
| Auditory – right ventral diencephalon | -0.01 (-0.02, -0.01) | <.001 | 0.43 (-1.38, 1.89)                 | .34   | -0.01 (-0.03, 0.02)           | .34   | 1.10 (0.74, 1.67)                               | <.001 | 1.08 (0.75, 1.65) | <.001 |

All multilevel mediation models controlled for fixed (age, sex, race/ethnicity, birthweight, premature birth, maternal age at birth, highest parent education, maternal depression, other prenatal substance use, school grade) and random (family, scanner/site) effects.

## Association of Prenatal Alcohol Exposure and Associated Outcomes

**Table S19: CBCL Internalizing Psychopathology**

|                                       | PAE → Brain (A)      |       | Brain → Internalizing Symptoms (B) |       | Overall Indirect Effect (A*B) |       | Direct Effect: PAE → Internalizing Symptoms (C) |       | Total Effect      |       |
|---------------------------------------|----------------------|-------|------------------------------------|-------|-------------------------------|-------|-------------------------------------------------|-------|-------------------|-------|
|                                       | B (95% CI)           | p     | B (95% CI)                         | p     | B (95% CI)                    | p     | B (95% CI)                                      | p     | B (95% CI)        | p     |
| <b>Brain Structure</b>                |                      |       |                                    |       |                               |       |                                                 |       |                   |       |
| <i>Volume</i>                         |                      |       |                                    |       |                               |       |                                                 |       |                   |       |
| Cerebrum                              | 39.43 (24.62, 51.22) | <.001 | -0.001 (-0.002, 0.000)             | .010  | -0.03 (-0.07, 0.00)           | .010  | 0.99 (0.68, 1.56)                               | <.001 | 0.95 (0.64, 1.54) | <.001 |
| Inferior temporal L                   | 2.87 (1.91, 3.63)    | <.001 | -0.01 (-0.02, 0.00)                | .140  | -0.01 (-0.06, 0.01)           | .140  | 0.98 (0.66-1.55)                                | <.001 | 0.95 (0.64, 1.54) | <.001 |
| Middle temporal L                     | 2.23 (1.39, 2.90)    | <.001 | -0.01 (-0.02, 0.00)                | .120  | -0.01 (-0.5, 0.01)            | .120  | 0.97 (0.66-1.55)                                | <.001 | 0.95 (0.64, 1.54) | <.001 |
| Middle temporal R                     | 2.30 (1.44, 2.99)    | <.001 | -0.01 (-0.02, 0.00)                | .060  | -0.02 (-0.5, 0.01)            | .060  | 0.98 (0.67-1.55)                                | <.001 | 0.95 (0.64, 1.54) | <.001 |
| Lateral occipital L                   | 2.18 (1.29, 2.88)    | <.001 | 0.00 (-0.02, 0.01)                 | .280  | -0.01 (-0.04, 0.01)           | .280  | 0.97 (0.66-1.54)                                | <.001 | 0.95 (0.64, 1.54) | <.001 |
| Inferior parietal L                   | 2.22 (1.15, 3.08)    | <.001 | -0.02 (-0.03, -0.01)               | <.001 | -0.03 (-0.06, -0.01)          | <.001 | 0.99 (0.68-1.56)                                | <.001 | 0.95 (0.64, 1.54) | <.001 |
| Supramarginal R                       | 1.94 (1.01, 2.69)    | <.001 | -0.01 (-0.02, 0.00)                | .030  | -0.02 (-0.04, 0.00)           | .030  | 0.98 (0.67-1.55)                                | <.001 | 0.95 (0.64, 1.53) | <.001 |
| <i>Surface area</i>                   |                      |       |                                    |       |                               |       |                                                 |       |                   |       |
| Inferior temporal L                   | 0.77 (0.53, 0.97)    | <.001 | -0.01 (-0.06, 0.03)                | .250  | -0.01 (-0.05, 0.02)           | .250  | 0.97 (0.66-1.54)                                | <.001 | 0.95 (0.64, 1.54) | <.001 |
| Lateral occipital L                   | 0.93 (0.63, 1.17)    | <.001 | -0.03 (-0.07, 0.00)                | .020  | -0.03 (-0.07, 0.00)           | .020  | 0.99 (0.67-1.56)                                | <.001 | 0.95 (0.64, 1.54) | <.001 |
| Precuneus R                           | 0.57 (0.31, 0.78)    | <.001 | -0.04 (-0.08, 0.00)                | .020  | -0.02 (-0.05, 0.00)           | .020  | 0.98 (0.67-1.55)                                | <.001 | 0.95 (0.64, 1.54) | <.001 |
| <b>Functional connectivity</b>        |                      |       |                                    |       |                               |       |                                                 |       |                   |       |
| Sensorimotor hand – salience          | 0.01 (0.00, 0.01)    | .02   | 0.12 (-2.15, 2.10)                 | .47   | 0.00 (-0.02, 0.02)            | .49   | 0.82 (0.47, 1.45)                               | <.001 | 0.81 (0.46, 1.46) | <.001 |
| Auditory – right ventral diencephalon | -0.01 (-0.02, -0.01) | <.001 | -0.58 (-2.51, 0.97)                | .22   | 0.01 (-0.01, 0.04)            | .22   | 0.81 (0.46, 1.45)                               | <.001 | 0.83 (0.48, 1.44) | <.001 |

All multilevel mediation models controlled for fixed (age, sex, race/ethnicity, birthweight, premature birth, maternal age at birth, highest parent education, maternal depression, other prenatal substance use, school grade) and random (family, scanner/site) effects.



## Association of Prenatal Alcohol Exposure and Associated Outcomes

**Table S20: CBCL Anxious and Depressive Symptoms**

|                                       | PAE → Brain (A)      |       | Brain → Anxiety Depression Symptoms (B) |       | Overall Indirect Effect (A*B) |       | Direct Effect: PAE → Anxiety Depression Symptoms (C) |      | Total Effect       |      |
|---------------------------------------|----------------------|-------|-----------------------------------------|-------|-------------------------------|-------|------------------------------------------------------|------|--------------------|------|
|                                       | B (95% CI)           | p     | B (95% CI)                              | p     | B (95% CI)                    | p     | B (95% CI)                                           | p    | B (95% CI)         | p    |
| <b>Brain Structure</b>                |                      |       |                                         |       |                               |       |                                                      |      |                    |      |
| <i>Volume</i>                         |                      |       |                                         |       |                               |       |                                                      |      |                    |      |
| Cerebrum                              | 39.43 (24.62, 51.22) | <.001 | 0.00 (-0.001, 0.000)                    | .010  | -0.02 (-0.04, 0.00)           | .010  | 0.23 (0.05, 0.55)                                    | .010 | 0.21 (0.02, 0.54)  | .010 |
| Inferior temporal L                   | 2.87 (1.91, 3.63)    | <.001 | -0.01 (-0.012, 0.001)                   | .050  | -0.01 (-0.04, 0.00)           | .050  | 0.22 (0.04, 0.55)                                    | .010 | 0.20 (0.02, 0.54)  | .010 |
| Middle temporal L                     | 2.23 (1.39, 2.90)    | <.001 | -0.01 (-0.01, 0.00)                     | .060  | -0.01 (-0.03, 0.00)           | .060  | 0.22 (0.04, 0.55)                                    | .010 | 0.21 (0.02, 0.54)  | .010 |
| Middle temporal R                     | 2.30 (1.44, 2.99)    | <.001 | -0.01 (-0.02, 0.00)                     | .010  | -0.02 (-0.04, 0.00)           | .010  | 0.22 (0.05, 0.55)                                    | .010 | 0.21 (0.02, 0.54)  | .010 |
| Lateral occipital L                   | 2.18 (1.29, 2.88)    | <.001 | 0.00 (-0.01, 0.01)                      | .490  | 0.00 (-0.02, 0.01)            | .490  | 0.21 (0.03, 0.54)                                    | .010 | 0.20 (0.03, 0.54)  | .010 |
| Inferior parietal L                   | 2.22 (1.15, 3.08)    | <.001 | -0.01 (-0.02, -0.004)                   | <.001 | -0.02 (-0.04, -0.01)          | <.001 | 0.23 (0.05, 0.56)                                    | .010 | 0.21 (0.02, 0.54)  | .010 |
| Supramarginal R                       | 1.94 (1.01, 2.69)    | <.001 | -0.01 (-0.01, 0.00)                     | .030  | -0.01 (-0.03, 0.00)           | .030  | 0.22 (0.04, 0.55)                                    | .010 | 0.21 (0.03, 0.54)  | .010 |
| <i>Surface area</i>                   |                      |       |                                         |       |                               |       |                                                      |      |                    |      |
| Inferior temporal L                   | 0.77 (0.53, 0.97)    | <.001 | -0.01 (-0.04, 0.01)                     | .140  | -0.01 (-0.03, 0.01)           | .140  | 0.22 (0.04, 0.55)                                    | .010 | 0.20 (0.02, 0.54)  | .010 |
| Lateral occipital L                   | 0.93 (0.63, 1.17)    | <.001 | -0.01 (-0.03, 0.01)                     | .110  | -0.01 (-0.03, 0.01)           | .110  | 0.22 (0.04, 0.55)                                    | .010 | 0.20 (0.02, 0.54)  | .010 |
| Precuneus R                           | 0.57 (0.31, 0.78)    | <.001 | -0.01 (-0.04, 0.01)                     | .110  | -0.01 (-0.02, 0.00)           | .110  | 0.22 (0.04, 0.54)                                    | .010 | 0.21 (0.03, 0.54)  | .010 |
| <b>Functional connectivity</b>        |                      |       |                                         |       |                               |       |                                                      |      |                    |      |
| Sensorimotor hand – salience          | 0.01 (0.00, 0.01)    | .02   | 0.04 (-1.24, 1.15)                      | .48   | 0.00 (-0.01, 0.01)            | .48   | 0.15 (-0.05, 0.51)                                   | .06  | 0.15 (-0.05, 0.51) | .08  |
| Auditory – right ventral diencephalon | -0.01 (-0.02, -0.01) | <.001 | -0.43 (-1.52, 0.44)                     | .14   | 0.01 (-0.01, 0.02)            | .14   | 0.15 (-0.05, 0.50)                                   | .08  | 0.16 (-0.04, 0.50) | .06  |

All multilevel mediation models controlled for fixed (age, sex, race/ethnicity, birthweight, premature birth, maternal age at birth, highest parent education, maternal depression, other prenatal substance use, school grade) and random (family, scanner/site) effects.

## Association of Prenatal Alcohol Exposure and Associated Outcomes

**Table S21: CBCL Withdrawn/Depressed**

|                                       | PAE → Brain (A)      |       | Brain → Withdrawal Symptoms (B) |       | Overall Indirect Effect (A*B) |       | Direct Effect: PAE → Withdrawal Symptoms (C) |       | Total Effect       |       |
|---------------------------------------|----------------------|-------|---------------------------------|-------|-------------------------------|-------|----------------------------------------------|-------|--------------------|-------|
|                                       | B (95% CI)           | p     | B (95% CI)                      | p     | B (95% CI)                    | p     | B (95% CI)                                   | p     | B (95% CI)         | p     |
| <b>Brain Structure</b>                |                      |       |                                 |       |                               |       |                                              |       |                    |       |
| <i>Volume</i>                         |                      |       |                                 |       |                               |       |                                              |       |                    |       |
| Cerebrum                              | 39.43 (24.62, 51.22) | <.001 | -0.001 (-0.001, 0.000)          | <.001 | -0.03 (-0.05, -0.01)          | <.001 | 0.29 (0.11, 0.60)                            | <.001 | 0.25 (0.08, 0.57)  | .010  |
| Inferior temporal L                   | 2.87 (1.91, 3.63)    | <.001 | -0.01 (-0.02, 0.00)             | <.001 | -0.03 (-0.05, -0.01)          | <.001 | 0.28 (0.11, 0.59)                            | <.001 | 0.25 (0.08, 0.57)  | .010  |
| Middle temporal L                     | 2.23 (1.39, 2.90)    | <.001 | -0.01 (-0.02, 0.00)             | <.001 | -0.02 (-0.04, -0.01)          | <.001 | 0.28 (0.11, 0.59)                            | <.001 | 0.25 (0.08, 0.57)  | .010  |
| Middle temporal R                     | 2.30 (1.44, 2.99)    | <.001 | -0.01 (-0.02, -0.01)            | <.001 | -0.03 (-0.05, -0.01)          | <.001 | 0.28 (0.11, 0.60)                            | <.001 | 0.25 (0.08, 0.57)  | .010  |
| Lateral occipital L                   | 2.18 (1.29, 2.88)    | <.001 | 0.00 (-0.01, 0.00)              | .230  | -0.01 (-0.02, 0.01)           | .230  | 0.26 (0.09, 0.58)                            | <.001 | 0.25 (0.08, 0.57)  | <.001 |
| Inferior parietal L                   | 2.22 (1.15, 3.08)    | <.001 | -0.01 (-0.02, -0.01)            | <.001 | -0.02 (-0.04, -0.01)          | <.001 | 0.28 (0.11, 0.59)                            | <.001 | 0.25 (0.08, 0.57)  | .010  |
| Supramarginal R                       | 1.94 (1.01, 2.69)    | <.001 | -0.01 (-0.02, -0.01)            | <.001 | -0.02 (-0.04, -0.01)          | <.001 | 0.28 (0.11, 0.59)                            | <.001 | 0.25 (0.08, 0.57)  | .010  |
| <i>Surface area</i>                   |                      |       |                                 |       |                               |       |                                              |       |                    |       |
| Inferior temporal L                   | 0.77 (0.53, 0.97)    | <.001 | -0.03 (-0.05, -0.01)            | .010  | -0.02 (-0.04, 0.00)           | .010  | 0.28 (0.11, 0.59)                            | <.001 | 0.25 (0.08, 0.57)  | .010  |
| Lateral occipital L                   | 0.93 (0.63, 1.17)    | <.001 | -0.01 (-0.03, 0.01)             | .260  | -0.01 (-0.03, 0.01)           | .260  | 0.26 (0.09, 0.58)                            | <.001 | 0.25 (0.08, 0.57)  | <.001 |
| Precuneus R                           | 0.57 (0.31, 0.78)    | <.001 | -0.04 (-0.06, -0.02)            | <.001 | -0.02 (-0.04, -0.01)          | <.001 | 0.28 (0.11, 0.59)                            | <.001 | 0.25 (0.08, 0.57)  | .010  |
| <b>Functional connectivity</b>        |                      |       |                                 |       |                               |       |                                              |       |                    |       |
| Sensorimotor hand – salience          | 0.01 (0.00, 0.01)    | .02   | 0.36 (-0.84, 1.41)              | .26   | 0.00 (-0.01, 0.01)            | .28   | 0.18 (0.00, 0.52)                            | .03   | 0.18 (-0.01, 0.52) | .03   |
| Auditory – right ventral diencephalon | -0.01 (-0.02, -0.01) | <.001 | -0.42 (-1.44, 0.40)             | .13   | 0.01 (-0.01, 0.02)            | .13   | 0.18 (-0.01, 0.51)                           | .04   | 0.19 (0.00, 0.52)  | .02   |

All multilevel mediation models controlled for fixed (age, sex, race/ethnicity, birthweight, premature birth, maternal age at birth, highest parent education, maternal depression, other prenatal substance use, school grade) and random (family, scanner/site) effects.

## Association of Prenatal Alcohol Exposure and Associated Outcomes

**Table S22: CBCL Somatic Complaints**

|                                       | PAE → Brain (A)      |       | Brain → Somatic Symptoms (B) |      | Overall Indirect Effect (A*B) |      | Direct Effect: PAE → Somatic Symptoms (C) |       | Total Effect      |       |
|---------------------------------------|----------------------|-------|------------------------------|------|-------------------------------|------|-------------------------------------------|-------|-------------------|-------|
|                                       | B (95% CI)           | p     | B (95% CI)                   | p    | B (95% CI)                    | p    | B (95% CI)                                | p     | B (95% CI)        | p     |
| <b>Brain Structure</b>                |                      |       |                              |      |                               |      |                                           |       |                   |       |
| <i>Volume</i>                         |                      |       |                              |      |                               |      |                                           |       |                   |       |
| Cerebrum                              | 39.43 (24.62, 51.22) | <.001 | 0.00 (-0.001, 0.000)         | .150 | -0.01 (-0.03, 0.01)           | .150 | 0.41 (0.23, 0.75)                         | <.001 | 0.40 (0.22, 0.74) | <.001 |
| Inferior temporal L                   | 2.87 (1.91, 3.63)    | <.001 | 0.00 (-0.01, 0.01)           | .500 | 0.00 (-0.02, 0.02)            | .500 | .041 (0.22, 0.74)                         | <.001 | 0.40 (0.22, 0.74) | <.001 |
| Middle temporal L                     | 2.23 (1.39, 2.90)    | <.001 | -0.01 (-0.01, 0.00)          | .060 | -0.01 (-0.03, 0.00)           | .060 | 0.42 (0.24, 0.75)                         | <.001 | 0.40 (0.22, 0.74) | <.001 |
| Middle temporal R                     | 2.30 (1.44, 2.99)    | <.001 | -0.01 (-0.01, 0.00)          | .060 | -0.01 (-0.03, 0.00)           | .060 | 0.42 (0.24, 0.75)                         | <.001 | 0.40 (0.22, 0.74) | <.001 |
| Lateral occipital L                   | 2.18 (1.29, 2.88)    | <.001 | 0.00 (-0.01, 0.00)           | .280 | 0.00 (-0.02, 0.01)            | .280 | 0.41 (0.23, 0.74)                         | <.001 | 0.40 (0.22, 0.74) | <.001 |
| Inferior parietal L                   | 2.22 (1.15, 3.08)    | <.001 | 0.00 (-0.01, 0.00)           | .110 | -0.01 (-0.02, 0.00)           | .110 | 0.41 (0.23, 0.75)                         | <.001 | 0.40 (0.22, 0.74) | <.001 |
| Supramarginal R                       | 1.94 (1.01, 2.69)    | <.001 | -0.01 (-0.01, 0.00)          | .030 | -0.01 (-0.03, 0.00)           | .030 | 0.42 (0.24, 0.75)                         | <.001 | 0.40 (0.22, 0.74) | <.001 |
| <i>Surface area</i>                   |                      |       |                              |      |                               |      |                                           |       |                   |       |
| Inferior temporal L                   | 0.77 (0.53, 0.97)    | <.001 | 0.01 (-0.02, 0.03)           | .280 | 0.01 (-0.02, 0.03)            | .280 | 0.40 (0.22, 0.74)                         | <.001 | 0.40 (0.22, 0.74) | <.001 |
| Lateral occipital L                   | 0.93 (0.63, 1.17)    | <.001 | -0.01 (-0.04, 0.00)          | .070 | -0.01 (-0.04, 0.00)           | .070 | 0.42 (0.24, 0.76)                         | <.001 | 0.40 (0.24, 0.76) | <.001 |
| Precuneus R                           | 0.57 (0.31, 0.78)    | <.001 | -0.02 (-0.05, 0.00)          | .010 | -0.01 (-0.03, 0.00)           | .010 | 0.42 (0.24, 0.75)                         | <.001 | 0.40 (0.22, 0.74) | <.001 |
| <b>Functional connectivity</b>        |                      |       |                              |      |                               |      |                                           |       |                   |       |
| Sensorimotor hand – salience          | 0.01 (0.00, 0.01)    | .02   | -0.36 (-1.67, 0.78)          | .28  | 0.00 (-0.01, 0.01)            | .30  | 0.32 (0.12, 0.68)                         | <.001 | 0.31 (0.11, 0.68) | <.001 |
| Auditory – right ventral diencephalon | -0.01 (-0.02, -0.01) | <.001 | 0.56 (-0.55, 1.45)           | .12  | -0.01 (-0.02, 0.01)           | .12  | 0.32 (0.12, 0.69)                         | <.001 | 0.32 (0.12, 0.68) | <.001 |

All multilevel mediation models controlled for fixed (age, sex, race/ethnicity, birthweight, premature birth, maternal age at birth, highest parent education, maternal depression, other prenatal substance use, school grade) and random (family, scanner/site) effects.

## Association of Prenatal Alcohol Exposure and Associated Outcomes

**Table S23: CBCL Thought**

|                                       | PAE → Brain (A)      |       | Brain → Thought Symptoms (B) |       | Overall Indirect Effect (A*B) |       | Direct Effect: PAE → Thought Symptoms (C) |       | Total Effect      |       |
|---------------------------------------|----------------------|-------|------------------------------|-------|-------------------------------|-------|-------------------------------------------|-------|-------------------|-------|
|                                       | B (95% CI)           | p     | B (95% CI)                   | p     | B (95% CI)                    | p     | B (95% CI)                                | p     | B (95% CI)        | p     |
| <b>Brain Structure</b>                |                      |       |                              |       |                               |       |                                           |       |                   |       |
| <i>Volume</i>                         |                      |       |                              |       |                               |       |                                           |       |                   |       |
| Cerebrum                              | 39.43 (24.62, 51.22) | <.001 | -0.001 (-0.001, 0.000)       | <.001 | -0.02 (-0.05, -0.01)          | <.001 | 0.39 (0.22, 0.71)                         | <.001 | 0.37 (0.19, 0.69) | <.001 |
| Inferior temporal L                   | 2.87 (1.91, 3.63)    | <.001 | -0.01 (-0.015, -0.003)       | <.001 | -0.02 (-0.05, -0.01)          | <.001 | 0.39 (0.22, 0.71)                         | <.001 | 0.37 (0.19, 0.9)  | <.001 |
| Middle temporal L                     | 2.23 (1.39, 2.90)    | <.001 | -0.01 (-0.02, 0.00)          | .010  | -0.02 (-0.04, 0.00)           | .010  | 0.39 (0.21, 0.70)                         | <.001 | 0.37 (0.19, 0.69) | <.001 |
| Middle temporal R                     | 2.30 (1.44, 2.99)    | <.001 | -0.01 (-0.01, 0.00)          | .020  | -0.01 (-0.03, 0.00)           | .020  | 0.38 (0.21, 0.70)                         | <.001 | 0.37 (0.19, 0.69) | <.001 |
| Lateral occipital L                   | 2.18 (1.29, 2.88)    | <.001 | 0.00 (-0.01, 0.01)           | .410  | 0.00 (-0.02, 0.01)            | .410  | 0.37 (0.20, 0.69)                         | <.001 | 0.37 (0.19, 0.69) | <.001 |
| Inferior parietal L                   | 2.22 (1.15, 3.08)    | <.001 | -0.01 (-0.02, -0.01)         | <.001 | -0.02 (-0.04, -0.01)          | <.001 | 0.39 (0.22, 0.71)                         | <.001 | 0.37 (0.19, 0.69) | <.001 |
| Supramarginal R                       | 1.94 (1.01, 2.69)    | <.001 | -0.01 (-0.01, 0.00)          | .010  | -0.01 (-0.03, 0.00)           | .010  | 0.38 (0.21, 0.70)                         | <.001 | 0.37 (0.19, 0.69) | <.001 |
| <i>Surface area</i>                   |                      |       |                              |       |                               |       |                                           |       |                   |       |
| Inferior temporal L                   | 0.77 (0.53, 0.97)    | <.001 | -0.03 (-0.06, -0.01)         | .010  | -0.02 (-0.04, -0.01)          | .010  | 0.39 (0.22, 0.71)                         | <.001 | 0.37 (0.19, 0.69) | <.001 |
| Lateral occipital L                   | 0.93 (0.63, 1.17)    | <.001 | -0.01 (-0.04, 0.00)          | .100  | -0.01 (-0.03, 0.00)           | .100  | 0.38 (0.21, 0.70)                         | <.001 | 0.37 (0.19, 0.69) | <.001 |
| Precuneus R                           | 0.57 (0.31, 0.78)    | <.001 | -0.03 (-0.06, 0.01)          | <.001 | -0.02 (-0.03, 0.00)           | <.001 | 0.39 (0.22, 0.70)                         | <.001 | 0.37 (0.19, 0.69) | <.001 |
| <b>Functional connectivity</b>        |                      |       |                              |       |                               |       |                                           |       |                   |       |
| Sensorimotor hand – salience          | 0.01 (0.00, 0.01)    | .02   | 0.49 (-0.73, 1.56)           | .18   | 0.00 (-0.01, 0.01)            | .20   | 0.30 (0.11, 0.64)                         | <.001 | 0.30 (0.11, 0.65) | <.001 |
| Auditory – right ventral diencephalon | -0.01 (-0.02, -0.01) | <.001 | 0.17 (-0.87, 1.00)           | .38   | 0.00 (-0.02, 0.01)            | .38   | 0.30 (0.12, 0.65)                         | <.001 | 0.31 (0.12, 0.64) | <.001 |

All multilevel mediation models controlled for fixed (age, sex, race/ethnicity, birthweight, premature birth, maternal age at birth, highest parent education, maternal depression, other prenatal substance use, school grade) and random (family, scanner/site) effects.

## Association of Prenatal Alcohol Exposure and Associated Outcomes

**Table S24: CBCL Attention Problems**

|                                       | PAE → Brain (A)      |       | Brain → Attention Deficits (B) |       | Overall Indirect Effect (A*B) |       | Direct Effect: PAE → Attention Deficits (C) |       | Total Effect      |       |
|---------------------------------------|----------------------|-------|--------------------------------|-------|-------------------------------|-------|---------------------------------------------|-------|-------------------|-------|
|                                       | B (95% CI)           | p     | B (95% CI)                     | p     | B (95% CI)                    | p     | B (95% CI)                                  | p     | B (95% CI)        | p     |
| <b>Brain Structure</b>                |                      |       |                                |       |                               |       |                                             |       |                   |       |
| <i>Volume</i>                         |                      |       |                                |       |                               |       |                                             |       |                   |       |
| Cerebrum                              | 39.43 (24.62, 51.22) | <.001 | -0.001 (-0.002, -0.001)        | <.001 | -0.05 (-0.08, -0.03)          | <.001 | 0.43 (0.25, 0.75)                           | <.001 | 0.37 (0.19, 0.71) | <.001 |
| Inferior temporal L                   | 2.87 (1.91, 3.63)    | <.001 | -0.01 (-0.02, -0.01)           | <.001 | -0.03 (-0.05, -0.01)          | <.001 | 0.41 (0.23, 0.73)                           | <.001 | 0.37 (0.19, 0.71) | <.001 |
| Middle temporal L                     | 2.23 (1.39, 2.90)    | <.001 | -0.01 (-0.02, -0.01)           | <.001 | -0.03 (-0.05, -0.01)          | <.001 | 0.40 (0.23, 0.73)                           | <.001 | 0.37 (0.19, 0.71) | <.001 |
| Middle temporal R                     | 2.30 (1.44, 2.99)    | <.001 | -0.02 (-0.03, -0.01)           | <.001 | -0.04 (-0.06, -0.02)          | <.001 | 0.41 (0.24, 0.74)                           | <.001 | 0.37 (0.19, 0.71) | <.001 |
| Lateral occipital L                   | 2.18 (1.29, 2.88)    | <.001 | -0.01 (-0.02, -0.01)           | <.001 | -0.03 (-0.05, -0.01)          | <.001 | 0.40 (0.22, 0.73)                           | <.001 | 0.37 (0.19, 0.71) | <.001 |
| Inferior parietal L                   | 2.22 (1.15, 3.08)    | <.001 | -0.01 (-0.02, -0.01)           | <.001 | -0.02 (-0.04, -0.01)          | <.001 | 0.40 (0.22, 0.73)                           | <.001 | 0.37 (0.19, 0.71) | <.001 |
| Supramarginal R                       | 1.94 (1.01, 2.69)    | <.001 | -0.02 (-0.02, -0.01)           | <.001 | -0.03 (-0.05, -0.02)          | <.001 | 0.41 (0.23, 0.73)                           | <.001 | 0.37 (0.19, 0.71) | <.001 |
| <i>Surface area</i>                   |                      |       |                                |       |                               |       |                                             |       |                   |       |
| Inferior temporal L                   | 0.77 (0.53, 0.97)    | <.001 | -0.04 (-0.07, -0.02)           | <.001 | -0.03 (-0.6, -0.01)           | <.001 | 0.41 (0.23, 0.74)                           | <.001 | 0.37 (0.19, 0.71) | <.001 |
| Lateral occipital L                   | 0.93 (0.63, 1.17)    | <.001 | -0.04 (-0.06, -0.02)           | <.001 | -0.04 (-0.06, -0.02)          | <.001 | 0.41 (0.23, 0.74)                           | <.001 | 0.37 (0.19, 0.71) | <.001 |
| Precuneus R                           | 0.57 (0.31, 0.78)    | <.001 | -0.05 (-0.08, -0.03)           | <.001 | -0.03 (-0.05, -0.01)          | <.001 | 0.41 (0.23, 0.73)                           | <.001 | 0.37 (0.19, 0.71) | <.001 |
| <b>Functional connectivity</b>        |                      |       |                                |       |                               |       |                                             |       |                   |       |
| Sensorimotor hand – salience          | 0.01 (0.00, 0.01)    | .02   | 0.58 (-0.67, 1.67)             | .12   | 0.00 (0.00, 0.01)             | .14   | 0.33 (0.14, 0.68)                           | <.001 | 0.33 (0.14, 0.69) | <.001 |
| Auditory – right ventral diencephalon | -0.01 (-0.02, -0.01) | <.001 | -0.21 (-1.26, 0.64)            | .29   | 0.00 (-0.01, 0.02)            | .29   | 0.33 (0.14, 0.68)                           | <.001 | 0.34 (0.15, 0.68) | <.001 |

All multilevel mediation models controlled for fixed (age, sex, race/ethnicity, birthweight, premature birth, maternal age at birth, highest parent education, maternal depression, other prenatal substance use, school grade) and random (family, scanner/site) effects.

## Association of Prenatal Alcohol Exposure and Associated Outcomes

**Table S25: CBCL Rule Breaking**

|                                       | PAE → Brain (A)      |       | Brain → Rule Breaking Symptoms (B) |       | Overall Indirect Effect (A*B) |       | Direct Effect: PAE → Rule Breaking Symptoms (C) |       | Total Effect      |       |
|---------------------------------------|----------------------|-------|------------------------------------|-------|-------------------------------|-------|-------------------------------------------------|-------|-------------------|-------|
|                                       | B (95% CI)           | p     | B (95% CI)                         | p     | B (95% CI)                    | p     | B (95% CI)                                      | p     | B (95% CI)        | p     |
| <b>Brain Structure</b>                |                      |       |                                    |       |                               |       |                                                 |       |                   |       |
| <i>Volume</i>                         |                      |       |                                    |       |                               |       |                                                 |       |                   |       |
| Cerebrum                              | 39.43 (24.62, 51.22) | <.001 | -0.001 (-0.001, -0.001)            | <.001 | -0.04 (-0.06, -0.02)          | <.001 | 0.26 (0.12, 0.51)                               | <.001 | 0.22 (0.08, 0.48) | <.001 |
| Inferior temporal L                   | 2.87 (1.91, 3.63)    | <.001 | -0.01 (-0.02, -0.01)               | <.001 | -0.03 (-0.05, -0.02)          | <.001 | 0.25 (0.12, 0.50)                               | <.001 | 0.22 (0.08, 0.48) | <.001 |
| Middle temporal L                     | 2.23 (1.39, 2.90)    | <.001 | -0.02 (-0.02, -0.01)               | <.001 | -0.03 (-0.05, -0.02)          | <.001 | 0.26 (0.12, 0.51)                               | <.001 | 0.22 (0.08, 0.48) | <.001 |
| Middle temporal R                     | 2.30 (1.44, 2.99)    | <.001 | -0.02 (-0.02, -0.01)               | <.001 | -0.04 (-0.06, -0.02)          | <.001 | 0.26 (0.12, 0.51)                               | <.001 | 0.22 (0.08, 0.48) | <.001 |
| Lateral occipital L                   | 2.18 (1.29, 2.88)    | <.001 | -0.01 (-0.02, -0.01)               | <.001 | -0.03 (-0.04, -0.01)          | <.001 | 0.25 (0.11, 0.50)                               | <.001 | 0.22 (0.08, 0.48) | <.001 |
| Inferior parietal L                   | 2.22 (1.15, 3.08)    | <.001 | -0.01 (-0.02, -0.01)               | <.001 | -0.02 (-0.04, -0.01)          | <.001 | 0.24 (0.11, 0.49)                               | <.001 | 0.22 (0.08, 0.48) | <.001 |
| Supramarginal R                       | 1.94 (1.01, 2.69)    | <.001 | -0.02 (0.02, -0.01)                | <.001 | -0.03 (-0.05, -0.01)          | <.001 | 0.25 (0.11, 0.50)                               | <.001 | 0.22 (0.08, 0.48) | <.001 |
| <i>Surface area</i>                   |                      |       |                                    |       |                               |       |                                                 |       |                   |       |
| Inferior temporal L                   | 0.77 (0.53, 0.97)    | <.001 | -0.04 (-0.06, -0.03)               | <.001 | -0.03 (-0.05, -0.02)          | <.001 | 0.25 (0.12, 0.51)                               | <.001 | 0.22 (0.08, 0.48) | <.001 |
| Lateral occipital L                   | 0.93 (0.63, 1.17)    | <.001 | -0.03 (-0.05, -0.02)               | <.001 | -0.03 (-0.05, -0.01)          | <.001 | 0.25 (0.11, 0.50)                               | <.001 | 0.22 (0.08, 0.48) | <.001 |
| Precuneus R                           | 0.57 (0.31, 0.78)    | <.001 | -0.03 (-0.05, -0.02)               | <.001 | -0.02 (-0.03, -0.01)          | <.001 | 0.24 (0.10, 0.49)                               | <.001 | 0.22 (0.08, 0.48) | <.001 |
| <b>Functional connectivity</b>        |                      |       |                                    |       |                               |       |                                                 |       |                   |       |
| Sensorimotor hand – salience          | 0.01 (0.00, 0.01)    | .02   | -0.66 (-1.62, 0.17)                | .05   | 0.00 (-0.01, 0.00)            | .07   | 0.26 (0.11, 0.52)                               | <.001 | 0.25 (0.10, 0.52) | <.001 |
| Auditory – right ventral diencephalon | -0.01 (-0.02, -0.01) | <.001 | 0.16 (-0.65, 0.81)                 | .36   | 0.00 (-0.01, 0.01)            | .36   | 0.25 (0.11, 0.52)                               | <.001 | 0.25 (0.11, 0.51) | <.001 |

All multilevel mediation models controlled for fixed (age, sex, race/ethnicity, birthweight, premature birth, maternal age at birth, highest parent education, maternal depression, other prenatal substance use, school grade) and random (family, scanner/site) effects.

## Association of Prenatal Alcohol Exposure and Associated Outcomes

**Table S26: CBCL Aggressive Symptoms**

|                                       | PAE → Brain (A)      |       | Brain → Aggressive Symptoms (B) |       | Overall Indirect Effect (A*B) |       | Direct Effect: PAE → Aggressive Symptoms (C) |       | Total Effect      |       |
|---------------------------------------|----------------------|-------|---------------------------------|-------|-------------------------------|-------|----------------------------------------------|-------|-------------------|-------|
|                                       | B (95% CI)           | p     | B (95% CI)                      | p     | B (95% CI)                    | p     | B (95% CI)                                   | p     | B (95% CI)        | p     |
| <b>Brain Structure</b>                |                      |       |                                 |       |                               |       |                                              |       |                   |       |
| <i>Volume</i>                         |                      |       |                                 |       |                               |       |                                              |       |                   |       |
| Cerebrum                              | 39.43 (24.62, 51.22) | <.001 | -0.001 (-0.001, -0.001)         | <.001 | -0.04 (-0.07, -0.02)          | <.001 | 0.36 (0.20, 0.65)                            | <.001 | 0.31 (0.15, 0.61) | <.001 |
| Inferior temporal L                   | 2.87 (1.91, 3.63)    | <.001 | -0.01 (-0.02, -0.01)            | <.001 | -0.03 (-0.05, -0.01)          | <.001 | 0.35 (0.19, 0.34)                            | <.001 | 0.31 (0.15, 0.61) | <.001 |
| Middle temporal L                     | 2.23 (1.39, 2.90)    | <.001 | -0.02 (-0.02, -0.01)            | <.001 | -0.03 (-0.06, -0.02)          | <.001 | 0.35 (0.19, 0.64)                            | <.001 | 0.31 (0.15, 0.61) | <.001 |
| Middle temporal R                     | 2.30 (1.44, 2.99)    | <.001 | -0.02 (-0.02, -0.01)            | <.001 | -0.04 (-0.06, -0.02)          | <.001 | 0.35 (0.20, 0.64)                            | <.001 | 0.31 (0.15, 0.61) | <.001 |
| Lateral occipital L                   | 2.18 (1.29, 2.88)    | <.001 | -0.01 (-0.02, 0.00)             | <.001 | -0.02 (-0.04, -0.01)          | <.001 | 0.34 (0.18, 0.63)                            | <.001 | 0.31 (0.15, 0.61) | <.001 |
| Inferior parietal L                   | 2.22 (1.15, 3.08)    | <.001 | -0.01 (-0.02, -0.01)            | <.001 | -0.02 (-0.04, -0.01)          | <.001 | 0.34 (0.18, 0.63)                            | <.001 | 0.31 (0.15, 0.61) | <.001 |
| Supramarginal R                       | 1.94 (1.01, 2.69)    | <.001 | -0.01 (-0.02, -0.01)            | <.001 | -0.02 (-0.04, -0.01)          | <.001 | 0.34 (0.18, 0.63)                            | <.001 | 0.31 (0.15, 0.61) | <.001 |
| <i>Surface area</i>                   |                      |       |                                 |       |                               |       |                                              |       |                   |       |
| Inferior temporal L                   | 0.77 (0.53, 0.97)    | <.001 | -0.05 (-0.07, -0.03)            | <.001 | -0.04 (-0.06, -0.02)          | <.001 | 0.35 (0.19, 0.64)                            | <.001 | 0.31 (0.15, 0.61) | <.001 |
| Lateral occipital L                   | 0.93 (0.63, 1.17)    | <.001 | -0.04 (-0.06, -0.02)            | <.001 | -0.03 (-0.06, -0.02)          | <.001 | 0.35 (0.19, 0.64)                            | <.001 | 0.31 (0.15, 0.61) | <.001 |
| Precuneus R                           | 0.57 (0.31, 0.78)    | <.001 | -0.04 (-0.06, -0.02)            | <.001 | -0.02 (-0.04, -0.01)          | <.001 | 0.34 (0.18, 0.63)                            | <.001 | 0.31 (0.15, 0.61) | <.001 |
| <b>Functional connectivity</b>        |                      |       |                                 |       |                               |       |                                              |       |                   |       |
| Sensorimotor hand – salience          | 0.01 (0.00, 0.01)    | .02   | -1.03 (-2.14, -0.07)            | .02   | -0.01 (-0.02, 0.00)           | .04   | 0.30 (0.13, 0.61)                            | <.001 | 0.29 (0.12, 0.60) | <.001 |
| Auditory – right ventral diencephalon | -0.01 (-0.02, -0.01) | <.001 | 0.36 (-0.58, 1.11)              | .23   | -0.01 (-0.02, 0.01)           | .23   | 0.30 (0.13, 0.61)                            | <.001 | 0.30 (0.13, 0.60) | <.001 |

All multilevel mediation models controlled for fixed (age, sex, race/ethnicity, birthweight, premature birth, maternal age at birth, highest parent education, maternal depression, other prenatal substance use, school grade) and random (family, scanner/site) effects.

## Association of Prenatal Alcohol Exposure and Associated Outcomes

**Table S27: UPPS-P Lack of Planning**

|                                       | PAE → Brain (A)      |       | Brain → Lack Planning (B) |      | Overall Indirect Effect (A*B) |      | Direct Effect: PAE → Lack Planning (C) |       | Total Effect      |       |
|---------------------------------------|----------------------|-------|---------------------------|------|-------------------------------|------|----------------------------------------|-------|-------------------|-------|
|                                       | B (95% CI)           | p     | B (95% CI)                | p    | B (95% CI)                    | p    | B (95% CI)                             | p     | B (95% CI)        | p     |
| <b>Brain Structure</b>                |                      |       |                           |      |                               |      |                                        |       |                   |       |
| <i>Volume</i>                         |                      |       |                           |      |                               |      |                                        |       |                   |       |
| Cerebrum                              | 39.43 (24.62, 51.22) | <.001 | 0.00 (0.00, 0.00)         | .360 | 0.00 (-0.01, 0.01)            | .360 | 0.19 (0.11, 0.32)                      | <.001 | 0.18 (0.11, 0.32) | <.001 |
| Inferior temporal L                   | 2.87 (1.91, 3.63)    | <.001 | 0.00 (0.00, 0.00)         | .400 | 0.00 (-0.01, 0.01)            | .400 | 0.18 (0.11, 0.31)                      | <.001 | 0.18 (0.11, 0.32) | <.001 |
| Middle temporal L                     | 2.23 (1.39, 2.90)    | <.001 | 0.00 (0.00, 0.00)         | .410 | 0.00 (-0.01, 0.01)            | .410 | 0.19 (0.12, 0.32)                      | <.001 | 0.18 (0.11, 0.32) | <.001 |
| Middle temporal R                     | 2.30 (1.44, 2.99)    | <.001 | 0.00 (0.00, 0.00)         | .380 | 0.00 (-0.01, 0.00)            | .380 | 0.19 (0.12, 0.32)                      | <.001 | 0.18 (0.11, 0.32) | <.001 |
| Lateral occipital L                   | 2.18 (1.29, 2.88)    | <.001 | 0.00 (0.00, 0.00)         | .410 | 0.00 (-0.01, 0.01)            | .410 | 0.19 (0.11, 0.32)                      | <.001 | 0.18 (0.11, 0.32) | <.001 |
| Inferior parietal L                   | 2.22 (1.15, 3.08)    | <.001 | 0.00 (0.00, 0.00)         | .400 | 0.00 (-0.01, 0.00)            | .400 | 0.19 (0.12, 0.32)                      | <.001 | 0.18 (0.11, 0.32) | <.001 |
| Supramarginal R                       | 1.94 (1.01, 2.69)    | <.001 | 0.00 (0.00, 0.00)         | .290 | 0.00 (-0.01, 0.00)            | .290 | 0.19 (0.12, 0.32)                      | <.001 | 0.18 (0.11, 0.32) | <.001 |
| <i>Surface area</i>                   |                      |       |                           |      |                               |      |                                        |       |                   |       |
| Inferior temporal L                   | 0.77 (0.53, 0.97)    | <.001 | 0.00 (-0.01, 0.01)        | .350 | 0.00 (-0.01, 0.01)            | .350 | 0.19 (0.12, 0.32)                      | <.001 | 0.18 (0.11, 0.32) | <.001 |
| Lateral occipital L                   | 0.93 (0.63, 1.17)    | <.001 | 0.00 (-0.01, 0.01)        | .310 | 0.00 (-0.01, 0.01)            | .310 | 0.18 (0.11, 0.31)                      | <.001 | 0.18 (0.11, 0.32) | <.001 |
| Precuneus R                           | 0.57 (0.31, 0.78)    | <.001 | 0.00 (-0.01, 0.01)        | .450 | 0.00 (-0.01, 0.00)            | .450 | 0.19 (0.12, 0.32)                      | <.001 | 0.18 (0.11, 0.32) | <.001 |
| <b>Functional connectivity</b>        |                      |       |                           |      |                               |      |                                        |       |                   |       |
| Sensorimotor hand – salience          | 0.01 (0.00, 0.01)    | .02   | 0.21 (-0.30, 0.65)        | .16  | 0.00 (0.00, 0.01)             | .18  | 0.20 (0.12, 0.34)                      | <.001 | 0.20 (0.12, 0.34) | <.001 |
| Auditory – right ventral diencephalon | -0.01 (-0.02, -0.01) | <.001 | 0.02 (-0.41, 0.36)        | .48  | 0.00 (-0.01, 0.01)            | .48  | 0.20 (0.12, 0.34)                      | <.001 | 0.20 (0.12, 0.34) | <.001 |

All multilevel mediation models controlled for fixed (age, sex, race/ethnicity, birthweight, premature birth, maternal age at birth, highest parent education, maternal depression, other prenatal substance use, school grade) and random (family, scanner/site) effects.



## Association of Prenatal Alcohol Exposure and Associated Outcomes

**Table S28: UPPS-P Sensation Seeking**

|                                       | PAE → Brain (A)      |       | Brain → Sensation Seeking (B) |      | Overall Indirect Effect (A*B) |      | Direct Effect: PAE → Sensation Seeking (C) |       | Total Effect      |       |
|---------------------------------------|----------------------|-------|-------------------------------|------|-------------------------------|------|--------------------------------------------|-------|-------------------|-------|
|                                       | B (95% CI)           | p     | B (95% CI)                    | p    | B (95% CI)                    | p    | B (95% CI)                                 | p     | B (95% CI)        | p     |
| <b>Brain Structure</b>                |                      |       |                               |      |                               |      |                                            |       |                   |       |
| <i>Volume</i>                         |                      |       |                               |      |                               |      |                                            |       |                   |       |
| Cerebrum                              | 39.43 (24.62, 51.22) | <.001 | 0.00 (0.00, 0.00)             | .050 | 0.01 (0.00, 0.02)             | .050 | 0.22 (0.14, 0.36)                          | <.001 | 0.22 (0.14, 0.37) | <.001 |
| Inferior temporal L                   | 2.87 (1.91, 3.63)    | <.001 | 0.00 (0.00, 0.01)             | .060 | 0.01 (0.00, 0.02)             | .060 | 0.22 (0.14, 0.36)                          | <.001 | 0.22 (0.14, 0.37) | <.001 |
| Middle temporal L                     | 2.23 (1.39, 2.90)    | <.001 | 0.00 (0.00, 0.01)             | .050 | 0.01 (0.00, 0.01)             | .050 | 0.22 (0.14, 0.36)                          | <.001 | 0.22 (0.14, 0.37) | <.001 |
| Middle temporal R                     | 2.30 (1.44, 2.99)    | <.001 | 0.00 (0.00, 0.01)             | .030 | 0.01 (0.00, 0.02)             | .030 | 0.22 (0.14, 0.36)                          | <.001 | 0.22 (0.14, 0.37) | <.001 |
| Lateral occipital L                   | 2.18 (1.29, 2.88)    | <.001 | 0.00 (0.00, 0.01)             | .040 | 0.01 (0.00, 0.01)             | .040 | 0.22 (0.14, 0.36)                          | <.001 | 0.22 (0.14, 0.37) | <.001 |
| Inferior parietal L                   | 2.22 (1.15, 3.08)    | <.001 | 0.00 (0.00, 0.00)             | .130 | 0.00 (0.00, 0.01)             | .130 | 0.22 (0.14, 0.37)                          | <.001 | 0.22 (0.14, 0.37) | <.001 |
| Supramarginal R                       | 1.94 (1.01, 2.69)    | <.001 | 0.00 (0.00, 0.01)             | .090 | 0.00 (0.00, 0.01)             | .090 | 0.22 (0.14, 0.37)                          | <.001 | 0.22 (0.14, 0.37) | <.001 |
| <i>Surface area</i>                   |                      |       |                               |      |                               |      |                                            |       |                   |       |
| Inferior temporal L                   | 0.77 (0.53, 0.97)    | <.001 | 0.01 (-0.01, 0.02)            | .100 | 0.01 (0.00, 0.01)             | .100 | 0.22 (0.14, 0.37)                          | <.001 | 0.22 (0.14, 0.37) | <.001 |
| Lateral occipital L                   | 0.93 (0.63, 1.17)    | <.001 | 0.00 (-0.01, 0.01)            | .230 | 0.00 (-0.01, 0.01)            | .230 | 0.22 (0.14, 0.37)                          | <.001 | 0.22 (0.14, 0.37) | <.001 |
| Precuneus R                           | 0.57 (0.31, 0.78)    | <.001 | 0.01 (0.00, 0.02)             | .070 | 0.00 (0.00, 0.01)             | .070 | 0.22 (0.14, 0.37)                          | <.001 | 0.22 (0.14, 0.37) | <.001 |
| <b>Functional connectivity</b>        |                      |       |                               |      |                               |      |                                            |       |                   |       |
| Sensorimotor hand – salience          | 0.01 (0.00, 0.01)    | .02   | 0.19 (-0.39, 0.69)            | .25  | 0.00 (0.00, 0.01)             | .27  | 0.19 (0.10, 0.35)                          | <.001 | 0.19 (0.10, 0.35) | <.001 |
| Auditory – right ventral diencephalon | -0.01 (-0.02, -0.01) | <.001 | 0.44 (-0.04, 0.83)            | .03  | -0.01 (-0.02, 0.00)           | .03  | 0.20 (0.11, 0.36)                          | <.001 | 0.19 (0.10, 0.35) | <.001 |

All multilevel mediation models controlled for fixed (age, sex, race/ethnicity, birthweight, premature birth, maternal age at birth, highest parent education, maternal depression, other prenatal substance use, school grade) and random (family, scanner/site) effects.

## Association of Prenatal Alcohol Exposure and Associated Outcomes

**Table S29: NIH Flanker Task**

|                                       | PAE → Brain (A)      |       | Brain → Flanker (B)  |       | Overall Indirect Effect (A*B) |       | Direct Effect: PAE → Flanker (C) |       | Total Effect      |       |
|---------------------------------------|----------------------|-------|----------------------|-------|-------------------------------|-------|----------------------------------|-------|-------------------|-------|
|                                       | B (95% CI)           | p     | B (95% CI)           | p     | B (95% CI)                    | p     | B (95% CI)                       | p     | B (95% CI)        | p     |
| <b>Brain Structure</b>                |                      |       |                      |       |                               |       |                                  |       |                   |       |
| <i>Volume</i>                         |                      |       |                      |       |                               |       |                                  |       |                   |       |
| Cerebrum                              | 39.43 (24.62, 51.22) | <.001 | 0.003 (0.002, 0.003) | <.001 | 0.10 (0.05, 0.16)             | <.001 | 1.07 (0.66, 1.81)                | <.001 | 1.15 (0.77, 1.91) | <.001 |
| Inferior temporal L                   | 2.87 (1.91, 3.63)    | <.001 | 0.02 (0.004, 0.033)  | .010  | 0.05 (0.01, 0.10)             | .010  | 1.11 (0.70, 1.86)                | <.001 | 1.15 (0.76, 1.92) | <.001 |
| Middle temporal L                     | 2.23 (1.39, 2.90)    | <.001 | 0.03 (0.01, 0.04)    | <.001 | 0.06 (0.02, 0.11)             | <.001 | 1.10 (0.70, 1.85)                | <.001 | 1.15 (0.76, 1.92) | <.001 |
| Middle temporal R                     | 2.30 (1.44, 2.99)    | <.001 | 0.03 (0.01, 0.04)    | <.001 | 0.06 (0.02, 0.11)             | <.001 | 1.11 (0.70, 1.85)                | <.001 | 1.15 (0.76, 1.92) | <.001 |
| Lateral occipital L                   | 2.18 (1.29, 2.88)    | <.001 | 0.03 (0.01, 0.04)    | <.001 | 0.06 (0.03, 0.12)             | <.001 | 1.10 (0.70, 1.85)                | <.001 | 1.15 (0.77, 1.91) | <.001 |
| Inferior parietal L                   | 2.22 (1.15, 3.08)    | <.001 | 0.01 (-0.002, 0.02)  | .05   | 0.02 (-0.01, 0.06)            | .05   | 1.11 (0.74, 1.89)                | <.001 | 1.15 (0.76, 1.91) | <.001 |
| Supramarginal R                       | 1.94 (1.01, 2.69)    | <.001 | 0.01 (-0.004, 0.03)  | .06   | 0.02 (-0.01, 0.05)            | .06   | 1.14 (0.74, 1.89)                | <.001 | 1.16 (0.76, 1.91) | <.001 |
| <i>Surface area</i>                   |                      |       |                      |       |                               |       |                                  |       |                   |       |
| Inferior temporal L                   | 0.77 (0.53, 0.97)    | <.001 | 0.11 (0.05, 0.16)    | <.001 | 0.08 (0.04, 0.14)             | <.001 | 1.08 (0.68, 1.83)                | <.001 | 1.15 (0.76, 1.92) | <.001 |
| Lateral occipital L                   | 0.93 (0.63, 1.17)    | <.001 | 0.10 (0.06, 0.14)    | <.001 | 1.07 (0.67, 1.82)             | <.001 | 1.07 (0.67, 1.82)                | <.001 | 1.15 (0.76, 1.92) | <.001 |
| Precuneus R                           | 0.57 (0.31, 0.78)    | <.001 | 0.11 (0.05, 0.15)    | <.001 | 0.06 (0.02, 0.11)             | <.001 | 1.11 (0.70, 1.86)                | <.001 | 1.15 (0.77, 1.91) | <.001 |
| <b>Functional connectivity</b>        |                      |       |                      |       |                               |       |                                  |       |                   |       |
| Sensorimotor hand – salience          | 0.01 (0.00, 0.01)    | .02   | -0.43 (-3.36, 2.13)  | .37   | 0.00 (-0.02, 0.02)            | .37   | 1.18 (0.73, 2.00)                | <.001 | 1.17 (0.71, 2.00) | <.001 |
| Auditory – right ventral diencephalon | -0.01 (-0.02, -0.01) | <.001 | 0.68 (-1.80, 2.68)   | .31   | -0.01 (-0.04, 0.02)           | .31   | 1.19 (0.73, 2.01)                | <.001 | 1.19 (0.74, 1.98) | <.001 |

All multilevel mediation models controlled for fixed (age, sex, race/ethnicity, birthweight, premature birth, maternal age at birth, highest parent education, maternal depression, other prenatal substance use, school grade) and random (family, scanner/site) effects.

## Association of Prenatal Alcohol Exposure and Associated Outcomes

**Table S30: KSADS Oppositional Defiant Disorder**

|                                       | PAE → Brain (A)         |       | Brain → ODD (B)           |       | Overall Indirect Effect (A*B) |       | Direct Effect: PAE → ODD (C) |       | Total Effect         |       |
|---------------------------------------|-------------------------|-------|---------------------------|-------|-------------------------------|-------|------------------------------|-------|----------------------|-------|
|                                       | B (SE)                  | p     | B (SE)                    | p     | B (SE)                        | p     | B (SE)                       | p     | B (SE)               | p     |
| <b>Brain Structure</b>                |                         |       |                           |       |                               |       |                              |       |                      |       |
| <i>Volume</i>                         |                         |       |                           |       |                               |       |                              |       |                      |       |
| Cerebrum                              | 38.711 (20.530, 53.418) | <.001 | -0.0001 (-0.0002, 0.0000) | .03   | -0.004 (-0.009, 0.000)        | .03   | 0.164 (0.078, 0.239)         | <.001 | 0.160 (0.077, 0.234) | <.001 |
| Inferior temporal L                   | 2.734 (1.554, 3.689)    | <.001 | -0.002 (-0.004, 0.000)    | <.001 | -0.006 (-0.012, -0.002)       | <.001 | 0.167 (0.081, 0.241)         | <.001 | 0.160 (0.077, 0.234) | <.001 |
| Middle temporal L                     | 2.214 (1.174, 3.054)    | <.001 | -0.002 (-0.004, 0.000)    | .04   | -0.004 (-0.009, 0.000)        | .04   | 0.164 (0.079, 0.240)         | <.001 | 0.160 (0.077, 0.235) | <.001 |
| Middle temporal R                     | 2.200 (1.136, 3.061)    | <.001 | -0.001 (-0.003, 0.000)    | .06   | -0.003 (-0.009, 0.000)        | .06   | 0.162 (0.079, 0.238)         | <.001 | 0.159 (0.077, 0.234) | <.001 |
| Lateral occipital L                   | 1.949 (0.864, 2.827)    | <.001 | -0.001 (-0.002, 0.001)    | .23   | -0.001 (-0.005, 0.003)        | .23   | 0.161 (0.076, 0.236)         | <.001 | 0.159 (0.077, 0.234) | <.001 |
| Inferior parietal L                   | 2.372 (1.044, 3.446)    | <.001 | -0.002 (-0.004, 0.000)    | .005  | -0.005 (-0.001, -0.001)       | .005  | 0.164 (0.080, 0.241)         | <.001 | 0.160 (0.077, 0.235) | <.001 |
| Supramarginal R                       | 2.016 (0.853, 2.957)    | <.001 | -0.002 (-0.003, 0.000)    | .03   | -0.003 (-0.008, 0.001)        | .03   | 0.162 (0.078, 0.238)         | <.001 | 0.159 (0.077, 0.235) | <.001 |
| <i>Surface area</i>                   |                         |       |                           |       |                               |       |                              |       |                      |       |
| Inferior temporal L                   | 7.336 (4.291, 9.799)    | <.001 | -0.001 (-0.002, 0.000)    | <.001 | -0.007 (-0.013, -0.002)       | <.001 | 0.167 (0.081, 0.243)         | <.001 | 0.160 (0.077, 0.235) | <.001 |
| Lateral occipital L                   | 0.871 (0.500, 1.171)    | <.001 | -0.003 (-0.009, 0.003)    | .12   | -0.003 (-0.008, 0.002)        | .12   | 0.163 (0.077, 0.239)         | <.001 | 0.160 (0.077, 0.235) | <.001 |
| Precuneus R                           | 0.570 (0.215, 0.804)    | <.001 | -0.008 (-0.015, -0.001)   | .02   | -0.004 (-0.009, 0.000)        | .02   | 0.163 (0.078, 0.238)         | <.001 | 0.160 (0.076, 0.233) | <.001 |
| <b>Functional connectivity</b>        |                         |       |                           |       |                               |       |                              |       |                      |       |
| Sensorimotor hand – salience          | 0.007 (0.000, 0.012)    | .01   | -0.166 (-0.538, 0.183)    | .17   | -0.001 (-0.005, 0.001)        | .18   | 0.159 (0.076, 0.235)         | <.001 | 0.159 (0.076, 0.235) | <.001 |
| Auditory – right ventral diencephalon | -0.015 (-0.023, -0.008) | <.001 | -0.123 (-0.399, 0.136)    | .23   | 0.002 (-0.002, 0.006)         | .23   | 0.157 (0.075, 0.233)         | <.001 | 0.159 (0.073, 0.239) | <.001 |

All multilevel mediation models controlled for fixed (age, sex, race/ethnicity, birthweight, premature birth, maternal age at birth, highest parent education, maternal depression, other prenatal substance use, school grade) and random (family, scanner/site) effects.

## Association of Prenatal Alcohol Exposure and Associated Outcomes

**Table S31: KSADS Separation Anxiety**

|                                       | PAE → Brain (A)      |       | Brain → Separation Anxiety (B) |       | Overall Indirect Effect (A*B) |       | Direct Effect: PAE → Separation Anxiety (C) |     | Total Effect      |     |
|---------------------------------------|----------------------|-------|--------------------------------|-------|-------------------------------|-------|---------------------------------------------|-----|-------------------|-----|
|                                       | B (SE)               | p     | B (SE)                         | p     | B (SE)                        | p     | B (SE)                                      | p   | B (SE)            | p   |
| <b>Brain Structure</b>                |                      |       |                                |       |                               |       |                                             |     |                   |     |
| <i>Volume</i>                         |                      |       |                                |       |                               |       |                                             |     |                   |     |
| Cerebrum                              | 38.71 (20.53, 53.42) | <.001 | 0.00 (0.00, 0.00)              | .12   | 0.00 (-0.01, 0.00)            | .12   | 0.10 (0.00, 0.17)                           | .03 | 0.10 (0.00, 0.17) | .03 |
| Inferior temporal L                   | 2.73 (1.55, 3.69)    | <.001 | 0.00 (0.00, 0.00)              | .29   | 0.00 (-0.01, 0.01)            | .29   | 0.10 (0.00, 0.17)                           | .03 | 0.10 (0.00, 0.17) | .02 |
| Middle temporal L                     | 2.21 (1.17, 3.05)    | <.001 | 0.00 (0.00, 0.00)              | .20   | 0.00 (-0.01, 0.00)            | .20   | 0.10 (0.00, 0.17)                           | .03 | 0.10 (0.00, 0.17) | .02 |
| Middle temporal R                     | 2.20 (1.14, 3.06)    | <.001 | 0.00 (0.00, 0.00)              | .28   | 0.00 (-0.01, 0.00)            | .28   | 0.10 (0.00, 0.17)                           | .03 | 0.10 (0.00, 0.17) | .03 |
| Lateral occipital L                   | 1.95 (0.86, 2.83)    | <.001 | 0.00 (0.00, 0.00)              | .32   | 0.00 (-0.01, 0.00)            | .32   | 0.10 (0.00, 0.17)                           | .03 | 0.10 (0.00, 0.17) | .03 |
| Inferior parietal L                   | 2.37 (1.04, 3.45)    | <.001 | 0.00 (0.00, 0.00)              | .12   | 0.00 (-0.01, 0.00)            | .12   | 0.10 (0.00, 0.17)                           | .03 | 0.10 (0.00, 0.17) | .03 |
| Supramarginal R                       | 2.02 (0.85, 2.96)    | <.001 | -0.003 (-0.005, -0.001)        | <.001 | -0.005 (-0.011, -0.001)       | <.001 | 0.10 (0.00, 0.18)                           | .02 | 0.10 (0.00, 0.17) | .03 |
| <i>Surface area</i>                   |                      |       |                                |       |                               |       |                                             |     |                   |     |
| Inferior temporal L                   | 7.34 (4.29, 9.80)    | <.001 | 0.00 (0.00, 0.00)              | .42   | 0.00 (-0.01, 0.01)            | .42   | 0.10 (0.00, 0.17)                           | .03 | 0.10 (0.00, 0.17) | .02 |
| Lateral occipital L                   | 0.87 (0.50, 1.17)    | <.001 | 0.00 (-0.01, 0.00)             | .30   | 0.00 (-0.01, 0.00)            | .30   | 0.10 (0.00, 0.17)                           | .03 | 0.10 (0.00, 0.17) | .03 |
| Precuneus R                           | 0.57 (0.22, 0.80)    | <.001 | -0.01 (-0.01, 0.00)            | .06   | 0.00 (-0.01, 0.00)            | .06   | 0.10 (0.00, 0.17)                           | .03 | 0.10 (0.00, 0.17) | .03 |
| <b>Functional connectivity</b>        |                      |       |                                |       |                               |       |                                             |     |                   |     |
| Sensorimotor hand – salience          | 0.01 (0.00, 0.01)    | .01   | -0.14 (-0.55, 0.27)            | .23   | 0.00 (0.00, 0.00)             | .24   | 0.10 (0.00, 0.17)                           | .03 | 0.09 (0.00, 0.17) | .03 |
| Auditory – right ventral diencephalon | -0.02 (-0.02, -0.01) | <.001 | -0.10 (-0.41, 0.20)            | .30   | 0.00 (0.00, 0.01)             | .30   | 0.10 (0.00, 0.17)                           | .03 | 0.0 (-0.01, 0.17) | .03 |

All multilevel mediation models controlled for fixed (age, sex, race/ethnicity, birthweight, premature birth, maternal age at birth, highest parent education, maternal depression, other prenatal substance use, school grade) and random (family, scanner/site) effects.

**Longitudinal Multilevel Mediation Analysis: Examining associations between PAE, baseline brain structure, and one-year follow-up psychological outcomes. (Tables S31-S42).**

**Table S32: Mediation Analyses – CBCL Total Problems At One-Year Follow-Up**

|                                       | PAE → Brain (A)      |       | Brain → Total Problems (B) |       | Overall Indirect Effect (A*B) |     | Direct Effect: PAE → Total Problems (C) |       | Total Effect      |       |
|---------------------------------------|----------------------|-------|----------------------------|-------|-------------------------------|-----|-----------------------------------------|-------|-------------------|-------|
|                                       | B (95% CI)           | p     | B (95% CI)                 | p     | B (95% CI)                    | p   | B (95% CI)                              | p     | B (95% CI)        | p     |
| <b>Brain Structure</b>                |                      |       |                            |       |                               |     |                                         |       |                   |       |
| <i>Volume</i>                         |                      |       |                            |       |                               |     |                                         |       |                   |       |
| Cerebrum                              | 50.27 (28.25, 67.27) | <.001 | 0.00 (0.00, 0.00)          | .11   | -0.03 (-0.10, 0.01)           | .11 | 1.69 (1.21, 2.58)                       | <.001 | 1.65 (1.16, 2.56) | <.001 |
| Inferior temporal L                   | 2.88 (1.46, 3.97)    | <.001 | -0.01 (-0.03, 0.00)        | .06   | -0.03 (-0.10, 0.01)           | .06 | 1.70 (1.22, 2.58)                       | <.001 | 1.65 (1.16, 2.56) | <.001 |
| Middle temporal L                     | 1.92 (0.67, 2.88)    | <.001 | 0.00 (-0.03, 0.01)         | .31   | -0.01 (-0.05, 0.03)           | .31 | 1.67 (1.19, 2.55)                       | <.001 | 1.66 (1.17, 2.55) | <.001 |
| Middle temporal R                     | 2.48 (1.19, 3.47)    | <.001 | -0.01 (-0.03, 0.01)        | .19   | -0.02 (-0.08, 0.02)           | .19 | 1.68 (1.20, 2.56)                       | <.001 | 1.65 (1.16, 2.55) | <.001 |
| Lateral occipital L                   | 1.78 (0.48, 2.79)    | .02   | -0.01 (-0.03, 0.01)        | .11   | -0.02 (-0.06, 0.01)           | .13 | 1.69 (1.20, 2.56)                       | <.001 | 1.66 (1.17, 2.55) | <.001 |
| Inferior parietal L                   | 1.51 (-0.10, 2.75)   | .05   | -0.02 (-0.04, -0.01)       | <.001 | -0.03 (-0.07, 0.00)           | .05 | 1.69 (1.21, 2.57)                       | <.001 | 1.66 (1.16, 2.55) | <.001 |
| Supramarginal R                       | 1.34 (-0.08, 2.44)   | .05   | -0.01 (-0.03, 0.01)        | .15   | -0.01 (-0.04, 0.01)           | .20 | 1.68 (1.20, 2.55)                       | <.001 | 1.66 (1.17, 2.55) | <.001 |
| <i>Surface area</i>                   |                      |       |                            |       |                               |     |                                         |       |                   |       |
| Inferior temporal L                   | 0.86 (0.50, 1.14)    | <.001 | -0.04 (-0.11, 0.02)        | .10   | -0.03 (-0.10, 0.02)           | .10 | 1.70 (1.21, 2.58)                       | <.001 | 1.65 (1.17, 2.56) | <.001 |
| Lateral occipital L                   | 1.15 (0.70, 1.51)    | <.001 | -0.04 (-0.10, 0.01)        | .06   | -0.04 (-0.12, 0.01)           | .06 | 1.70 (1.22, 2.59)                       | <.001 | 1.65 (1.17, 2.56) | <.001 |
| Precuneus R                           | 0.77 (0.37, 1.08)    | <.001 | -0.01 (-0.08, 0.05)        | .43   | 0.00 (-0.06, 0.04)            | .43 | 1.67 (1.18, 2.55)                       | <.001 | 1.65 (1.17, 2.55) | <.001 |
| <b>Functional connectivity</b>        |                      |       |                            |       |                               |     |                                         |       |                   |       |
| Sensorimotor hand – salience          | 0.01 (0.00, 0.01)    | .19   | -0.27 (-3.88, 2.81)        | .41   | 0.00 (-0.02, 0.01)            | .40 | 1.52 (1.00, 2.46)                       | <.001 | 1.51 (0.98, 2.47) | <.001 |
| Auditory – right ventral diencephalon | -0.01 (-0.02, 0.00)  | .02   | -2.20 (-5.27, 0.28)        | .04   | 0.02 (-0.01, 0.06)            | .06 | 1.49 (0.97, 2.44)                       | <.001 | 1.52 (0.99, 2.45) | <.001 |

All multilevel mediation models controlled for fixed (age, sex, race/ethnicity, birthweight, premature birth, maternal age at birth, highest parent education, maternal depression, other prenatal substance use, school grade) and random (family, scanner/site) effects.

## Association of Prenatal Alcohol Exposure and Associated Outcomes

**Table S33: CBCL Internalizing Psychopathology At One-Year Follow-Up**

|                                       | PAE → Brain (A)      |       | Brain → Internalizing Symptoms (B) |     | Overall Indirect Effect (A*B) |     | Direct Effect: PAE → Internalizing Symptoms (C) |       | Total Effect      |       |
|---------------------------------------|----------------------|-------|------------------------------------|-----|-------------------------------|-----|-------------------------------------------------|-------|-------------------|-------|
|                                       | B (95% CI)           | p     | B (95% CI)                         | p   | B (95% CI)                    | p   | B (95% CI)                                      | p     | B (95% CI)        | p     |
| <b>Brain Structure</b>                |                      |       |                                    |     |                               |     |                                                 |       |                   |       |
| <i>Volume</i>                         |                      |       |                                    |     |                               |     |                                                 |       |                   |       |
| Cerebrum                              | 50.27 (28.25, 67.27) | <.001 | 0.00 (0.00, 0.00)                  | .32 | 0.01 (-0.05, 0.06)            | .32 | 1.07 (0.60, 1.93)                               | <.001 | 1.07 (0.60, 1.94) | <.001 |
| Inferior temporal L                   | 2.88 (1.46, 3.97)    | <.001 | 0.00 (-0.02, 0.01)                 | .29 | -0.01 (-0.07, 0.03)           | .29 | 1.10 (0.63, 1.95)                               | <.001 | 1.07 (0.60, 1.95) | <.001 |
| Middle temporal L                     | 1.92 (0.67, 2.88)    | <.001 | 0.00 (-0.02, 0.02)                 | .35 | 0.01 (-0.04, 0.04)            | .35 | 1.08 (0.61, 1.93)                               | <.001 | 1.07 (0.61, 1.94) | <.001 |
| Middle temporal R                     | 2.48 (1.19, 3.47)    | <.001 | 0.01 (-0.02, 0.02)                 | .31 | 0.01 (-0.04, 0.06)            | .31 | 1.07 (0.60, 1.92)                               | <.001 | 1.07 (0.60, 1.94) | <.001 |
| Lateral occipital L                   | 1.78 (0.48, 2.79)    | .02   | 0.01 (-0.02, 0.02)                 | .31 | 0.01 (-0.03, 0.04)            | .33 | 1.08 (0.61, 1.93)                               | <.001 | 1.08 (0.61, 1.94) | <.001 |
| Inferior parietal L                   | 1.51 (-0.10, 2.75)   | .05   | -0.01 (-0.03, 0.00)                | .03 | -0.02 (-0.05, 0.01)           | .08 | 1.10 (0.64, 1.95)                               | <.001 | 1.08 (0.60, 1.94) | <.001 |
| Supramarginal R                       | 1.34 (-0.08, 2.44)   | .05   | 0.00 (-0.02, 0.02)                 | .44 | 0.00 (-0.03, 0.03)            | .47 | 1.08 (0.62, 1.93)                               | <.001 | 1.08 (0.61, 1.94) | <.001 |
| <i>Surface area</i>                   |                      |       |                                    |     |                               |     |                                                 |       |                   |       |
| Inferior temporal L                   | 0.86 (0.50, 1.14)    | <.001 | 0.02 (-0.06, 0.07)                 | .34 | 0.02 (-0.05, 0.07)            | .34 | 1.07 (0.60, 1.92)                               | <.001 | 1.07 (0.61, 1.95) | <.001 |
| Lateral occipital L                   | 1.15 (0.70, 1.51)    | <.001 | 0.02 (-0.04, 0.07)                 | .24 | 0.02 (-0.05, 0.08)            | .24 | 1.06 (0.59, 1.92)                               | <.001 | 1.07 (0.61, 1.95) | <.001 |
| Precuneus R                           | 0.77 (0.37, 1.08)    | <.001 | 0.02 (-0.05, 0.07)                 | .34 | 0.01 (-0.05, 0.06)            | .34 | 1.07 (0.60, 1.93)                               | <.001 | 1.07 (0.60, 1.94) | <.001 |
| <b>Functional connectivity</b>        |                      |       |                                    |     |                               |     |                                                 |       |                   |       |
| Sensorimotor hand – salience          | 0.01 (0.00, 0.01)    | .19   | -0.08 (-3.59, 2.92)                | .46 | 0.00 (-0.02, 0.02)            | .43 | 1.03 (0.52, 1.95)                               | <.001 | 1.02 (0.51, 1.95) | <.001 |
| Auditory – right ventral diencephalon | -0.01 (-0.02, 0.00)  | .02   | -2.61 (-5.59, -0.20)               | .02 | 0.02 (0.00, 0.07)             | .04 | 1.00 (0.49, 1.92)                               | <.001 | 1.04 (0.52, 1.94) | <.001 |

All multilevel mediation models controlled for fixed (age, sex, race/ethnicity, birthweight, premature birth, maternal age at birth, highest parent education, maternal depression, other prenatal substance use, school grade) and random (family, scanner/site) effects.

Association of Prenatal Alcohol Exposure and Associated Outcomes

**Table S34: CBCL Externalizing Psychopathology At One-Year Follow-Up**

|                                       | PAE → Brain (A)      |       | Brain → Externalizing Symptoms (B) |       | Overall Indirect Effect (A*B) |       | Direct Effect: PAE → Externalizing Symptoms (C) |       | Total Effect      |       |
|---------------------------------------|----------------------|-------|------------------------------------|-------|-------------------------------|-------|-------------------------------------------------|-------|-------------------|-------|
|                                       | B (95% CI)           | p     | B (95% CI)                         | p     | B (95% CI)                    | p     | B (95% CI)                                      | p     | B (95% CI)        | p     |
| <b>Brain Structure</b>                |                      |       |                                    |       |                               |       |                                                 |       |                   |       |
| <i>Volume</i>                         |                      |       |                                    |       |                               |       |                                                 |       |                   |       |
| Cerebrum                              | 50.27 (28.25, 67.27) | <.001 | -0.001 (-0.002, -0.001)            | <.001 | -0.07 (-0.14, -0.02)          | <.001 | 1.31 (0.88, 2.11)                               | <.001 | 1.24 (0.80, 2.05) | <.001 |
| Inferior temporal L                   | 2.88 (1.46, 3.97)    | <.001 | -0.03 (-0.04, -0.01)               | <.001 | -0.07 (-0.13, -0.02)          | <.001 | 1.32 (0.89, 2.11)                               | <.001 | 1.24 (0.79, 2.05) | <.001 |
| Middle temporal L                     | 1.92 (0.67, 2.88)    | <.001 | -0.01 (-0.03, 0.01)                | .09   | -0.02 (-0.06, 0.01)           | .09   | 1.27 (0.84, 2.06)                               | <.001 | 1.24 (0.80, 2.04) | <.001 |
| Middle temporal R                     | 2.48 (1.19, 3.47)    | <.001 | -0.02 (-0.04, -0.01)               | <.001 | -0.05 (-0.11, -0.01)          | <.001 | 1.30 (0.87, 2.09)                               | <.001 | 1.24 (0.79, 2.05) | <.001 |
| Lateral occipital L                   | 1.78 (0.48, 2.79)    | .02   | -0.02 (-0.04, 0.00)                | .01   | -0.03 (-0.08, 0.00)           | .03   | 1.28 (0.85, 2.07)                               | <.001 | 1.24 (0.80, 2.04) | <.001 |
| Inferior parietal L                   | 1.51 (-0.10, 2.75)   | .05   | -0.02 (-0.03, -0.01)               | <.001 | -0.02 (-0.07, 0.00)           | .05   | 1.28 (0.85, 2.06)                               | <.001 | 1.24 (0.80, 2.04) | <.001 |
| Supramarginal R                       | 1.34 (-0.08, 2.44)   | .05   | -0.01 (-0.03, 0.00)                | .02   | -0.02 (-0.05, 0.00)           | .07   | 1.27 (0.84, 2.05)                               | <.001 | 1.25 (0.80, 2.04) | <.001 |
| <i>Surface area</i>                   |                      |       |                                    |       |                               |       |                                                 |       |                   |       |
| Inferior temporal L                   | 0.86 (0.50, 1.14)    | <.001 | -0.10 (-0.17, -0.05)               | <.001 | -0.08 (-0.15, -0.03)          | <.001 | 1.33 (0.90, 2.12)                               | <.001 | 1.24 (0.80, 2.05) | <.001 |
| Lateral occipital L                   | 1.15 (0.70, 1.51)    | <.001 | -0.06 (-0.11, -0.02)               | <.001 | -0.06 (-0.13, -0.02)          | <.001 | 1.31 (0.88, 2.10)                               | <.001 | 1.23 (0.80, 2.05) | <.001 |
| Precuneus R                           | 0.77 (0.37, 1.08)    | <.001 | -0.02 (-0.09, 0.02)                | .16   | -0.02 (-0.07, 0.02)           | .16   | 1.27 (0.84, 2.06)                               | <.001 | 1.24 (0.80, 2.05) | <.001 |
| <b>Functional connectivity</b>        |                      |       |                                    |       |                               |       |                                                 |       |                   |       |
| Sensorimotor hand – salience          | 0.01 (0.00, 0.01)    | .19   | -1.39 (-4.62, 1.36)                | .13   | 0.00 (-0.03, 0.01)            | .24   | 1.19 (0.72, 2.03)                               | <.001 | 1.18 (0.70, 2.03) | <.001 |
| Auditory – right ventral diencephalon | -0.01 (-0.02, 0.00)  | .02   | -0.88 (-3.62, 1.33)                | .22   | 0.01 (-0.01, 0.04)            | .22   | 1.17 (0.71, 2.02)                               | <.001 | 1.19 (0.72, 2.02) | <.001 |

All multilevel mediation models controlled for fixed (age, sex, race/ethnicity, birthweight, premature birth, maternal age at birth, highest parent education, maternal depression, other prenatal substance use, school grade) and random (family, scanner/site) effects.

## Association of Prenatal Alcohol Exposure and Associated Outcomes

**Table S35: CBCL Somatic Complaints At One-Year Follow-Up**

|                                       | PAE → Brain (A)      |       | Brain → Somatic Symptoms (B) |     | Overall Indirect Effect (A*B) |     | Direct Effect: PAE → Somatic Symptoms (C) |       | Total Effect      |       |
|---------------------------------------|----------------------|-------|------------------------------|-----|-------------------------------|-----|-------------------------------------------|-------|-------------------|-------|
|                                       | B (95% CI)           | p     | B (95% CI)                   | p   | B (95% CI)                    | p   | B (95% CI)                                | p     | B (95% CI)        | p     |
| <b>Brain Structure</b>                |                      |       |                              |     |                               |     |                                           |       |                   |       |
| <i>Volume</i>                         |                      |       |                              |     |                               |     |                                           |       |                   |       |
| Cerebrum                              | 50.27 (28.25, 67.27) | <.001 | 0.00 (0.00, 0.00)            | .37 | 0.01 (-0.03, 0.03)            | .37 | 0.39 (0.12, 0.87)                         | .01   | 0.39 (0.12, 0.88) | <.001 |
| Inferior temporal L                   | 2.88 (1.46, 3.97)    | <.001 | 0.00 (-0.01, 0.01)           | .31 | -0.01 (-0.04, 0.02)           | .31 | 0.40 (0.14, 0.88)                         | .01   | 0.39 (0.12, 0.88) | .01   |
| Middle temporal L                     | 1.92 (0.67, 2.88)    | <.001 | -0.01 (-0.02, 0.00)          | .14 | -0.01 (-0.04, 0.01)           | .14 | 0.41 (0.14, 0.89)                         | <.001 | 0.39 (0.12, 0.88) | .01   |
| Middle temporal R                     | 2.48 (1.19, 3.47)    | <.001 | 0.00 (-0.02, 0.01)           | .18 | -0.01 (-0.04, 0.01)           | .18 | 0.41 (0.14, 0.89)                         | <.001 | 0.39 (0.12, 0.88) | .01   |
| Lateral occipital L                   | 1.78 (0.48, 2.79)    | .02   | 0.00 (-0.01, 0.01)           | .46 | 0.00 (-0.02, 0.02)            | .46 | 0.40 (0.13, 0.88)                         | .01   | 0.39 (0.13, 0.88) | <.001 |
| Inferior parietal L                   | 1.51 (-0.10, 2.75)   | .05   | -0.01 (-0.02, 0.00)          | .05 | -0.01 (-0.03, 0.00)           | .10 | 0.41 (0.14, 0.88)                         | <.001 | 0.39 (0.13, 0.88) | .01   |
| Supramarginal R                       | 1.34 (-0.08, 2.44)   | .05   | 0.00 (-0.02, 0.00)           | .15 | -0.01 (-0.02, 0.01)           | .20 | 0.40 (0.14, 0.88)                         | <.001 | 0.39 (0.13, 0.88) | .01   |
| <i>Surface area</i>                   |                      |       |                              |     |                               |     |                                           |       |                   |       |
| Inferior temporal L                   | 0.86 (0.50, 1.14)    | <.001 | 0.01 (-0.03, 0.04)           | .35 | 0.01 (-0.03, 0.04)            | .35 | 0.39 (0.13, 0.87)                         | .01   | 0.39 (0.13, 0.88) | <.001 |
| Lateral occipital L                   | 1.15 (0.70, 1.51)    | <.001 | 0.01 (-0.03, 0.03)           | .32 | 0.01 (-0.03, 0.04)            | .32 | 0.38 (0.12, 0.87)                         | .01   | 0.39 (0.13, 0.88) | <.001 |
| Precuneus R                           | 0.77 (0.37, 1.08)    | <.001 | -0.02 (-0.05, 0.01)          | .15 | -0.01 (-0.04, 0.01)           | .15 | 0.41 (0.14, 0.89)                         | <.001 | 0.39 (0.12, 0.88) | .01   |
| <b>Functional connectivity</b>        |                      |       |                              |     |                               |     |                                           |       |                   |       |
| Sensorimotor hand – salience          | 0.01 (0.00, 0.01)    | .19   | 0.40 (-1.58, 2.08)           | .34 | 0.00 (-0.01, 0.01)            | .47 | 0.40 (0.12, 0.92)                         | .01   | 0.40 (0.11, 0.92) | .01   |
| Auditory – right ventral diencephalon | -0.01 (-0.02, 0.00)  | .02   | -0.48 (-2.16, 0.87)          | .24 | 0.01 (-0.01, 0.03)            | .24 | 0.40 (0.11, 0.91)                         | .01   | 0.40 (0.12, 0.91) | .01   |

All multilevel mediation models controlled for fixed (age, sex, race/ethnicity, birthweight, premature birth, maternal age at birth, highest parent education, maternal depression, other prenatal substance use, school grade) and random (family, scanner/site) effects.



## Association of Prenatal Alcohol Exposure and Associated Outcomes

**Table S36: CBCL Attention Problems At One-Year Follow-Up**

|                                       | PAE → Brain (A)      |       | Brain → Attention Deficits (B) |     | Overall Indirect Effect (A*B) |     | Direct Effect: PAE → Attention Deficits (C) |     | Total Effect       |     |
|---------------------------------------|----------------------|-------|--------------------------------|-----|-------------------------------|-----|---------------------------------------------|-----|--------------------|-----|
|                                       | B (95% CI)           | p     | B (95% CI)                     | p   | B (95% CI)                    | p   | B (95% CI)                                  | p   | B (95% CI)         | p   |
| <b>Brain Structure</b>                |                      |       |                                |     |                               |     |                                             |     |                    |     |
| <i>Volume</i>                         |                      |       |                                |     |                               |     |                                             |     |                    |     |
| Cerebrum                              | 50.27 (28.25, 67.27) | <.001 | 0.00 (0.00, 0.00)              | .05 | -0.02 (-0.06, 0.00)           | .05 | 0.33 (0.08, 0.79)                           | .01 | 0.30 (0.05, 0.77)  | .01 |
| Inferior temporal L                   | 2.88 (1.46, 3.97)    | <.001 | -0.01 (-0.02, 0.00)            | .09 | -0.01 (-0.05, 0.01)           | .09 | 0.33 (0.08, 0.78)                           | .01 | 0.30 (0.05, 0.77)  | .01 |
| Middle temporal L                     | 1.92 (0.67, 2.88)    | <.001 | 0.00 (-0.02, 0.01)             | .19 | -0.01 (-0.03, 0.01)           | .19 | 0.32 (0.07, 0.77)                           | .01 | 0.31 (0.05, 0.77)  | .01 |
| Middle temporal R                     | 2.48 (1.19, 3.47)    | <.001 | -0.01 (-0.02, 0.00)            | .05 | -0.02 (-0.05, 0.00)           | .05 | 0.33 (0.08, 0.78)                           | .01 | 0.30 (0.05, 0.77)  | .01 |
| Lateral occipital L                   | 1.78 (0.48, 2.79)    | .02   | -0.01 (-0.02, -0.001)          | .01 | -0.01 (-0.04, 0.00)           | .03 | 0.33 (0.08, 0.78)                           | .01 | 0.31 (0.05, 0.77)  | .01 |
| Inferior parietal L                   | 1.51 (-0.10, 2.75)   | .05   | -0.01 (-0.02, 0.00)            | .01 | -0.01 (-0.04, 0.00)           | .06 | 0.32 (0.08, 0.78)                           | .01 | 0.31 (0.05, 0.77)  | .01 |
| Supramarginal R                       | 1.34 (-0.08, 2.44)   | .05   | 0.00 (-0.02, 0.00)             | .13 | -0.01 (-0.02, 0.00)           | .18 | 0.32 (0.07, 0.77)                           | .01 | 0.31 (0.06, 0.77)  | .01 |
| <i>Surface area</i>                   |                      |       |                                |     |                               |     |                                             |     |                    |     |
| Inferior temporal L                   | 0.86 (0.50, 1.14)    | <.001 | -0.02 (-0.06, 0.01)            | .11 | -0.01 (-0.05, 0.01)           | .11 | 0.33 (0.08, 0.78)                           | .01 | 0.30 (0.05, 0.77)  | .01 |
| Lateral occipital L                   | 1.15 (0.70, 1.51)    | <.001 | -0.03 (-0.06, -0.01)           | .01 | -0.03 (-0.07, -0.01)          | .01 | 0.34 (0.09, 0.80)                           | .01 | 0.30 (0.05, 0.77)  | .01 |
| Precuneus R                           | 0.77 (0.37, 1.08)    | <.001 | -0.01 (-0.05, 0.01)            | .18 | -0.01 (-0.04, 0.01)           | .18 | 0.32 (0.07, 0.77)                           | .01 | 0.30 (0.05, 0.77)  | .01 |
| <b>Functional connectivity</b>        |                      |       |                                |     |                               |     |                                             |     |                    |     |
| Sensorimotor hand – salience          | 0.01 (0.00, 0.01)    | .19   | -0.62 (-2.42, 0.91)            | .21 | 0.00 (-0.01, 0.01)            | .30 | 0.20 (-0.06, 0.67)                          | .07 | 0.19 (-0.08, 0.67) | .09 |
| Auditory – right ventral diencephalon | -0.01 (-0.02, 0.00)  | .02   | -0.74 (-2.27, 0.49)            | .11 | 0.01 (-0.01, 0.03)            | .13 | 0.19 (-0.07, 0.66)                          | .10 | 0.20 (-0.07, 0.66) | .10 |

All multilevel mediation models controlled for fixed (age, sex, race/ethnicity, birthweight, premature birth, maternal age at birth, highest parent education, maternal depression, other prenatal substance use, school grade) and random (family, scanner/site) effects.

Association of Prenatal Alcohol Exposure and Associated Outcomes

**Table S37: CBCL Anxious and Depressive Symptoms At One-Year Follow-Up**

|                                       | PAE → Brain (A)      |       | Brain → Anxiety Depression Symptoms (B) |     | Overall Indirect Effect (A*B) |     | Direct Effect: PAE → Anxiety Depression Symptoms (C) |     | Total Effect       |     |
|---------------------------------------|----------------------|-------|-----------------------------------------|-----|-------------------------------|-----|------------------------------------------------------|-----|--------------------|-----|
|                                       | B (95% CI)           | p     | B (95% CI)                              | p   | B (95% CI)                    | p   | B (95% CI)                                           | p   | B (95% CI)         | p   |
| <b>Brain Structure</b>                |                      |       |                                         |     |                               |     |                                                      |     |                    |     |
| <i>Volume</i>                         |                      |       |                                         |     |                               |     |                                                      |     |                    |     |
| Cerebrum                              | 50.27 (28.25, 67.27) | <.001 | -0.01 (-0.05, 0.03)                     | .29 | -0.01 (-0.04, 0.02)           | .29 | 0.26 (-0.02, 0.78)                                   | .04 | 0.25 (-0.04, 0.77) | .04 |
| Inferior temporal L                   | 2.88 (1.46, 3.97)    | <.001 | -0.01 (-0.02, 0.00)                     | .12 | -0.01 (-0.04, 0.01)           | .12 | 0.27 (-0.01, 0.78)                                   | .04 | 0.25 (-0.04, 0.77) | .04 |
| Middle temporal L                     | 1.92 (0.67, 2.88)    | <.001 | 0.00 (-0.01, 0.01)                      | .33 | 0.00 (-0.02, 0.03)            | .35 | 0.25 (-0.03, 0.76)                                   | .04 | 0.26 (-0.03, 0.77) | .04 |
| Middle temporal R                     | 2.48 (1.19, 3.47)    | <.001 | 0.00 (-0.01, 0.01)                      | .42 | 0.00 (-0.03, 0.02)            | .42 | 0.26 (-0.02, 0.77)                                   | .04 | 0.25 (-0.04, 0.77) | .04 |
| Lateral occipital L                   | 1.78 (0.48, 2.79)    | .02   | 0.00 (-0.01, 0.01)                      | .42 | 0.00 (-0.02, 0.01)            | .43 | 0.26 (-0.02, 0.77)                                   | .04 | 0.26 (-0.03, 0.77) | .04 |
| Inferior parietal L                   | 1.51 (-0.10, 2.75)   | .05   | -0.01 (-0.02, 0.00)                     | .04 | -0.01 (-0.03, 0.00)           | .09 | 0.27 (-0.01, 0.78)                                   | .04 | 0.25 (-0.04, 0.77) | .04 |
| Supramarginal R                       | 1.34 (-0.08, 2.44)   | .05   | 0.00 (-0.01, 0.01)                      | .26 | 0.00 (-0.01, 0.02)            | .29 | 0.25 (-0.03, 0.76)                                   | .04 | 0.26 (-0.03, 0.77) | .04 |
| <i>Surface area</i>                   |                      |       |                                         |     |                               |     |                                                      |     |                    |     |
| Inferior temporal L                   | 0.86 (0.50, 1.14)    | <.001 | -0.01 (-0.05, 0.02)                     | .28 | -0.01 (-0.04, 0.02)           | .28 | 0.26 (-0.02, 0.78)                                   | .04 | 0.25 (-0.03, 0.77) | .04 |
| Lateral occipital L                   | 1.15 (0.70, 1.51)    | <.001 | -0.01 (-0.04, 0.02)                     | .29 | -0.01 (-0.04, 0.02)           | .29 | 0.26 (-0.02, 0.78)                                   | .04 | 0.25 (-0.03, 0.77) | .04 |
| Precuneus R                           | 0.77 (0.37, 1.08)    | <.001 | 0.02 (-0.02, 0.05)                      | .10 | 0.01 (-0.01, 0.04)            | .10 | 0.24 (-0.04, 0.75)                                   | .04 | 0.25 (-0.03, 0.77) | .04 |
| <b>Functional connectivity</b>        |                      |       |                                         |     |                               |     |                                                      |     |                    |     |
| Sensorimotor hand – salience          | 0.01 (0.00, 0.01)    | .19   | 0.29 (-1.65, 1.94)                      | .37 | 0.00 (-0.01, 0.01)            | .48 | 0.26 (-0.02, 0.76)                                   | .04 | 0.26 (-0.03, 0.77) | .04 |
| Auditory – right ventral diencephalon | -0.01 (-0.02, 0.00)  | .02   | -1.24 (-2.88, 0.09)                     | .03 | 0.01 (0.00, 0.04)             | .05 | 0.24 (-0.04, 0.75)                                   | .04 | 0.26 (-0.02, 0.76) | .04 |

All multilevel mediation models controlled for fixed (age, sex, race/ethnicity, birthweight, premature birth, maternal age at birth, highest parent education, maternal depression, other prenatal substance use, school grade) and random (family, scanner/site) effects.

Association of Prenatal Alcohol Exposure and Associated Outcomes

**Table S38: CBCL Withdrawn/Depressed At One-Year Follow-Up**

|                                       | PAE → Brain (A)      |       | Brain → Withdrawal Symptoms (B) |     | Overall Indirect Effect (A*B) |     | Direct Effect: PAE → Withdrawal Symptoms (C) |     | Total Effect       |     |
|---------------------------------------|----------------------|-------|---------------------------------|-----|-------------------------------|-----|----------------------------------------------|-----|--------------------|-----|
|                                       | B (95% CI)           | p     | B (95% CI)                      | p   | B (95% CI)                    | p   | B (95% CI)                                   | p   | B (95% CI)         | p   |
| <b>Brain Structure</b>                |                      |       |                                 |     |                               |     |                                              |     |                    |     |
| <i>Volume</i>                         |                      |       |                                 |     |                               |     |                                              |     |                    |     |
| Cerebrum                              | 50.27 (28.25, 67.27) | <.001 | 0.00 (0.00, 0.00)               | .48 | 0.00 (-0.04, 0.03)            | .48 | 0.25 (-0.04, 0.78)                           | .04 | 0.25 (-0.05, 0.78) | .05 |
| Inferior temporal L                   | 2.88 (1.46, 3.97)    | <.001 | -0.01 (-0.02, 0.00)             | .11 | -0.01 (-0.04, 0.01)           | .11 | 0.26 (-0.03, 0.79)                           | .04 | 0.25 (-0.05, 0.78) | .05 |
| Middle temporal L                     | 1.92 (0.67, 2.88)    | <.001 | 0.00 (-0.01, 0.01)              | .45 | 0.00 (-0.02, 0.02)            | .45 | 0.25 (-0.04, 0.78)                           | .04 | 0.25 (-0.05, 0.78) | .05 |
| Middle temporal R                     | 2.48 (1.19, 3.47)    | <.001 | 0.00 (-0.01, 0.01)              | .41 | 0.00 (-0.03, 0.03)            | .41 | 0.25 (-0.04, 0.78)                           | .04 | 0.25 (-0.05, 0.78) | .05 |
| Lateral occipital L                   | 1.78 (0.48, 2.79)    | .02   | 0.00 (-0.01, 0.01)              | .44 | 0.00 (-0.02, 0.01)            | .45 | 0.25 (-0.04, 0.78)                           | .04 | 0.25 (-0.04, 0.78) | .04 |
| Inferior parietal L                   | 1.51 (-0.10, 2.75)   | .05   | -0.01 (-0.02, 0.00)             | .02 | -0.01 (-0.04, 0.00)           | .07 | 0.26 (-0.03, 0.79)                           | .04 | 0.25 (-0.05, 0.78) | .05 |
| Supramarginal R                       | 1.34 (-0.08, 2.44)   | .05   | 0.01 (-0.01, 0.02)              | .12 | 0.00 (-0.01, 0.03)            | .15 | 0.24 (-0.05, 0.77)                           | .05 | 0.25 (-0.04, 0.78) | .04 |
| <i>Surface area</i>                   |                      |       |                                 |     |                               |     |                                              |     |                    |     |
| Inferior temporal L                   | 0.86 (0.50, 1.14)    | <.001 | -0.01 (-0.05, 0.03)             | .35 | -0.01 (-0.04, 0.02)           | .35 | 0.26 (-0.04, 0.78)                           | .04 | 0.24 (-0.05, 0.78) | .05 |
| Lateral occipital L                   | 1.15 (0.70, 1.51)    | <.001 | 0.01 (-0.03, 0.04)              | .30 | 0.01 (-0.03, 0.04)            | .30 | 0.24 (-0.05, 0.77)                           | .05 | 0.25 (-0.05, 0.78) | .05 |
| Precuneus R                           | 0.77 (0.37, 1.08)    | <.001 | 0.01 (-0.03, 0.04)              | .35 | 0.01 (-0.02, 0.03)            | .35 | 0.24 (-0.04, 0.77)                           | .04 | 0.25 (-0.05, 0.78) | .05 |
| <b>Functional connectivity</b>        |                      |       |                                 |     |                               |     |                                              |     |                    |     |
| Sensorimotor hand – salience          | 0.01 (0.00, 0.01)    | .19   | 0.11 (-1.89, 1.80)              | .47 | 0.00 (-0.01, 0.01)            | .46 | 0.25 (-0.04, 0.78)                           | .04 | 0.25 (-0.04, 0.78) | .04 |
| Auditory – right ventral diencephalon | -0.01 (-0.02, 0.00)  | .02   | -0.03 (-1.73, 1.34)             | .48 | 0.00 (-0.02, 0.02)            | .48 | 0.25 (-0.04, 0.78)                           | .04 | 0.26 (-0.03, 0.77) | .04 |

All multilevel mediation models controlled for fixed (age, sex, race/ethnicity, birthweight, premature birth, maternal age at birth, highest parent education, maternal depression, other prenatal substance use, school grade) and random (family, scanner/site) effects.

## Association of Prenatal Alcohol Exposure and Associated Outcomes

**Table S39: CBCL Thought At One-Year Follow-Up**

|                                       | PAE → Brain (A)      |       | Brain → Thought Symptoms (B) |     | Overall Indirect Effect (A*B) |     | Direct Effect: PAE → Thought Symptoms (C) |       | Total Effect      |       |
|---------------------------------------|----------------------|-------|------------------------------|-----|-------------------------------|-----|-------------------------------------------|-------|-------------------|-------|
|                                       | B (95% CI)           | p     | B (95% CI)                   | p   | B (95% CI)                    | p   | B (95% CI)                                | p     | B (95% CI)        | p     |
| <b>Brain Structure</b>                |                      |       |                              |     |                               |     |                                           |       |                   |       |
| <i>Volume</i>                         |                      |       |                              |     |                               |     |                                           |       |                   |       |
| Cerebrum                              | 50.27 (28.25, 67.27) | <.001 | 0.00 (0.00, 0.00)            | .08 | -0.02 (-0.06, 0.01)           | .08 | 0.58 (0.30, 0.18)                         | <.001 | 0.55 (0.27, 1.06) | <.001 |
| Inferior temporal L                   | 2.88 (1.46, 3.97)    | <.001 | -0.01 (-0.02, 0.00)          | .09 | -0.02 (-0.04, 0.01)           | .09 | 0.57 (0.30, 1.07)                         | <.001 | 0.56 (0.27, 1.06) | <.001 |
| Middle temporal L                     | 1.92 (0.67, 2.88)    | <.001 | 0.00 (-0.02, 0.01)           | .24 | -0.01 (-0.03, 0.01)           | .24 | 0.56 (0.29, 1.06)                         | <.001 | 0.56 (0.28, 1.06) | <.001 |
| Middle temporal R                     | 2.48 (1.19, 3.47)    | <.001 | -0.00 (-0.02, 0.01)          | .32 | 0.00 (-0.03, 0.02)            | .32 | 0.56 (0.29, 1.06)                         | <.001 | 0.56 (0.28, 1.06) | <.001 |
| Lateral occipital L                   | 1.78 (0.48, 2.79)    | .02   | -0.01 (-0.02, 0.00)          | .06 | -0.01 (-0.03, 0.00)           | .13 | 0.57 (0.30, 1.06)                         | <.001 | 0.56 (0.28, 1.06) | <.001 |
| Inferior parietal L                   | 1.51 (-0.10, 2.75)   | .05   | -0.01 (-0.02, 0.00)          | .06 | -0.01 (-0.03, 0.00)           | .11 | 0.57 (0.30, 1.06)                         | <.001 | 0.56 (0.28, 1.06) | <.001 |
| Supramarginal R                       | 1.34 (-0.08, 2.44)   | .05   | 0.00 (-0.01, 0.01)           | .25 | 0.00 (-0.01, 0.02)            | .28 | 0.55 (0.28, 1.05)                         | <.001 | 0.56 (0.28, 1.06) | <.001 |
| <i>Surface area</i>                   |                      |       |                              |     |                               |     |                                           |       |                   |       |
| Inferior temporal L                   | 0.86 (0.50, 1.14)    | <.001 | -0.03 (-0.07, 0.01)          | .06 | -0.02 (-0.06, 0.01)           | .06 | 0.58 (0.30, 1.08)                         | <.001 | 0.55 (0.28, 1.06) | <.001 |
| Lateral occipital L                   | 1.15 (0.70, 1.51)    | <.001 | -0.03 (-0.06, 0.00)          | .01 | -0.03 (-0.06, 0.00)           | .01 | 0.58 (0.30, 1.08)                         | <.001 | 0.55 (0.27, 1.06) | <.001 |
| Precuneus R                           | 0.77 (0.37, 1.08)    | <.001 | 0.00 (-0.04, 0.03)           | .48 | 0.00 (-0.03, 0.02)            | .48 | 0.56 (0.29, 1.06)                         | <.001 | 0.56 (0.28, 1.06) | <.001 |
| <b>Functional connectivity</b>        |                      |       |                              |     |                               |     |                                           |       |                   |       |
| Sensorimotor hand – salience          | 0.01 (0.00, 0.01)    | .19   | -0.88 (-2.77, 0.72)          | .12 | 0.00 (-0.02, 0.01)            | .23 | 0.56 (0.29, 1.06)                         | <.001 | 0.56 (0.28, 1.06) | <.001 |
| Auditory – right ventral diencephalon | -0.01 (-0.02, 0.00)  | .02   | -0.52 (-2.13, 0.77)          | .22 | 0.01 (-0.01, 0.02)            | .22 | 0.55 (0.28, 1.05)                         | <.001 | 0.56 (0.29, 1.05) | <.001 |

All multilevel mediation models controlled for fixed (age, sex, race/ethnicity, birthweight, premature birth, maternal age at birth, highest parent education, maternal depression, other prenatal substance use, school grade) and random (family, scanner/site) effects.

## Association of Prenatal Alcohol Exposure and Associated Outcomes

**Table S40: CBCL Rule Breaking At One-Year Follow-Up**

|                                       | PAE → Brain (A)      |       | Brain → Rule Breaking Symptoms (B) |       | Overall Indirect Effect (A*B) |       | Direct Effect: PAE → Rule Breaking Symptoms (C) |       | Total Effect      |       |
|---------------------------------------|----------------------|-------|------------------------------------|-------|-------------------------------|-------|-------------------------------------------------|-------|-------------------|-------|
|                                       | B (95% CI)           | p     | B (95% CI)                         | p     | B (95% CI)                    | p     | B (95% CI)                                      | p     | B (95% CI)        | p     |
| <b>Brain Structure</b>                |                      |       |                                    |       |                               |       |                                                 |       |                   |       |
| <i>Volume</i>                         |                      |       |                                    |       |                               |       |                                                 |       |                   |       |
| Cerebrum                              | 50.27 (28.25, 67.27) | <.001 | -0.001 (-0.001, -0.001)            | <.001 | -0.04 (-0.08, -0.02)          | <.001 | 0.46 (0.25, 0.82)                               | <.001 | 0.41 (0.20, 0.79) | <.001 |
| Inferior temporal L                   | 2.88 (1.46, 3.97)    | <.001 | -0.02 (-0.02, -0.01)               | <.001 | -0.04 (-0.07, -0.01)          | <.001 | 0.45 (0.25, 0.82)                               | <.001 | 0.41 (0.20, 0.79) | <.001 |
| Middle temporal L                     | 1.92 (0.67, 2.88)    | <.001 | -0.01 (-0.02, 0.00)                | .01   | -0.01 (-0.04, 0.00)           | .03   | 0.43 (0.23, 0.80)                               | <.001 | 0.41 (0.20, 0.79) | <.001 |
| Middle temporal R                     | 2.48 (1.19, 3.47)    | <.001 | -0.01 (-0.02, -0.01)               | <.001 | -0.03 (-0.06, -0.01)          | <.001 | 0.44 (0.24, 0.81)                               | <.001 | 0.41 (0.20, 0.79) | <.001 |
| Lateral occipital L                   | 1.78 (0.48, 2.79)    | .02   | -0.02 (-0.03, -0.01)               | <.001 | -0.02 (-0.05, 0.01)           | .07   | 0.43 (0.23, 0.80)                               | <.001 | 0.42 (0.20, 0.78) | <.001 |
| Inferior parietal L                   | 1.51 (-0.10, 2.75)   | .05   | -0.01 (-0.02, -0.01)               | <.001 | -0.02 (-0.04, 0.00)           | .05   | 0.43 (0.23, 0.80)                               | <.001 | 0.41 (0.20, 0.78) | <.001 |
| Supramarginal R                       | 1.34 (-0.08, 2.44)   | .05   | -0.01 (-0.02, -0.01)               | <.001 | -0.02 (-0.04, 0.00)           | .03   | 0.43 (0.23, 0.80)                               | <.001 | 0.41 (0.20, 0.78) | <.001 |
| <i>Surface area</i>                   |                      |       |                                    |       |                               |       |                                                 |       |                   |       |
| Inferior temporal L                   | 0.86 (0.50, 1.14)    | <.001 | -0.05 (-0.08, -0.02)               | <.001 | -0.04 (-0.07, -0.01)          | <.001 | 0.45 (0.25, 0.82)                               | <.001 | 0.41 (0.20, 0.79) | <.001 |
| Lateral occipital L                   | 1.15 (0.70, 1.51)    | <.001 | -0.04 (-0.06, -0.02)               | <.001 | -0.04 (-0.07, -0.01)          | <.001 | 0.45 (0.25, 0.82)                               | <.001 | 0.41 (0.20, 0.79) | <.001 |
| Precuneus R                           | 0.77 (0.37, 1.08)    | <.001 | -0.03 (-0.06, -0.01)               | .01   | -0.02 (-0.04, 0.00)           | .01   | 0.43 (0.23, 0.80)                               | <.001 | 0.41 (0.20, 0.79) | <.001 |
| <b>Functional connectivity</b>        |                      |       |                                    |       |                               |       |                                                 |       |                   |       |
| Sensorimotor hand – salience          | 0.01 (0.00, 0.01)    | .19   | -0.85 (-2.23, 0.34)                | .08   | 0.00 (-0.01, 0.00)            | .21   | 0.42 (0.22, 0.78)                               | <.001 | 0.41 (0.21, 0.78) | <.001 |
| Auditory – right ventral diencephalon | -0.01 (-0.02, 0.00)  | .02   | 0.07 (-1.11, 1.03)                 | .47   | 0.00 (-0.01, 0.01)            | .47   | 0.42 (0.22, 0.78)                               | <.001 | 0.42 (0.22, 0.78) | <.001 |

All multilevel mediation models controlled for fixed (age, sex, race/ethnicity, birthweight, premature birth, maternal age at birth, highest parent education, maternal depression, other prenatal substance use, school grade) and random (family, scanner/site) effects.

Association of Prenatal Alcohol Exposure and Associated Outcomes

**Table S41: CBCL Aggressive Symptoms At One-Year Follow-Up**

|                                       | PAE → brain (a)      |       | Brain → aggressive symptoms (b) |       | Overall indirect effect (a*b) |       | Direct effect: PAE → aggressive symptoms (c) |     | Total effect       |     |
|---------------------------------------|----------------------|-------|---------------------------------|-------|-------------------------------|-------|----------------------------------------------|-----|--------------------|-----|
|                                       | B (95% CI)           | p     | B (95% CI)                      | p     | B (95% CI)                    | p     | B (95% CI)                                   | p   | B (95% CI)         | p   |
| <b>Brain Structure</b>                |                      |       |                                 |       |                               |       |                                              |     |                    |     |
| <i>Volume</i>                         |                      |       |                                 |       |                               |       |                                              |     |                    |     |
| Cerebrum                              | 50.27 (28.25, 67.27) | <.001 | -0.001 (-0.001, 0.000)          | <.001 | -0.03 (-0.07, -0.01)          | <.001 | 0.18 (-0.05, 0.59)                           | .06 | 0.14 (-0.10, 0.56) | .14 |
| Inferior temporal L                   | 2.88 (1.46, 3.97)    | <.001 | -0.01 (-0.02, -0.01)            | <.001 | -0.03 (-0.06, -0.01)          | <.001 | 0.17 (-0.06, 0.58)                           | .07 | 0.14 (-0.10, 0.56) | .14 |
| Middle temporal L                     | 1.92 (0.67, 2.88)    | <.001 | -0.01 (-0.02, 0.00)             | .01   | -0.02 (-0.04, 0.00)           | .03   | 0.16 (-0.07, 0.57)                           | .10 | 0.14 (-0.10, 0.56) | .13 |
| Middle temporal R                     | 2.48 (1.19, 3.47)    | <.001 | -0.01 (-0.02, -0.01)            | <.001 | -0.03 (-0.06, -0.01)          | <.001 | 0.17 (-0.06, 0.58)                           | .07 | 0.14 (-0.10, 0.56) | .14 |
| Lateral occipital L                   | 1.78 (0.48, 2.79)    | .02   | -0.01 (-0.02, -0.01)            | <.001 | -0.02 (-0.04, 0.00)           | .07   | 0.16 (-0.07, 0.57)                           | .10 | 0.14 (-0.10, 0.56) | .14 |
| Inferior parietal L                   | 1.51 (-0.10, 2.75)   | .05   | -0.01 (-0.02, -0.01)            | <.001 | -0.02 (-0.05, 0.00)           | .05   | 0.16 (-0.06, 0.57)                           | .10 | 0.14 (-0.10, 0.56) | .14 |
| Supramarginal R                       | 1.34 (-0.08, 2.44)   | .05   | -0.01 (-0.02, 0.00)             | .04   | -0.01 (-0.03, 0.00)           | .07   | 0.15 (-0.07, 0.56)                           | .13 | 0.14 (-0.10, 0.56) | .14 |
| <i>Surface area</i>                   |                      |       |                                 |       |                               |       |                                              |     |                    |     |
| Inferior temporal L                   | 0.86 (0.50, 1.14)    | <.001 | -0.05 (-0.08, -0.02)            | <.001 | -0.03 (-0.07, -0.01)          | <.001 | 0.18 (-0.05, 0.59)                           | .06 | 0.14 (-0.09, 0.56) | .14 |
| Lateral occipital L                   | 1.15 (0.70, 1.51)    | <.001 | -0.03 (-0.06, -0.01)            | <.001 | -0.03 (-0.06, -0.01)          | <.001 | 0.17 (-0.06, 0.58)                           | .06 | 0.14 (-0.10, 0.56) | .14 |
| Precuneus R                           | 0.77 (0.37, 1.08)    | <.001 | -0.01 (-0.04, 0.01)             | .20   | -0.01 (-0.03, 0.01)           | .009  | 0.15 (-0.05, 0.59)                           | .06 | 0.14 (-0.10, 0.56) | .14 |
| <b>Functional connectivity</b>        |                      |       |                                 |       |                               |       |                                              |     |                    |     |
| Sensorimotor hand – salience          | 0.01 (0.00, 0.01)    | .19   | -1.39 (-2.95, -0.07)            | .02   | 0.00 (-0.02, 0.01)            | .19   | 0.15 (-0.08, 0.56)                           | .13 | 0.14 (-0.09, 0.56) | .14 |
| Auditory – right ventral diencephalon | -0.01 (-0.02, 0.00)  | .02   | -0.47 (-1.80, 0.60)             | .17   | 0.00 (-0.01, 0.02)            | .17   | 0.14 (-0.09, 0.55)                           | .16 | 0.15 (-0.08, 0.55) | .14 |

All multilevel mediation models controlled for fixed (age, sex, race/ethnicity, birthweight, premature birth, maternal age at birth, highest parent education, maternal depression, other prenatal substance use, school grade) and random (family, scanner/site) effects.

Association of Prenatal Alcohol Exposure and Associated Outcomes

**Table S42: KSADS Oppositional Defiant Disorder At One-Year Follow-Up**

|                                       | PAE → Brain (A)      |       | Brain → ODD (B)             |       | Overall Indirect Effect (A*B) |       | Direct Effect: PAE → ODD (C) |     | Total Effect       |     |
|---------------------------------------|----------------------|-------|-----------------------------|-------|-------------------------------|-------|------------------------------|-----|--------------------|-----|
|                                       | B (SE)               | p     | B (SE)                      | p     | B (SE)                        | p     | B (SE)                       | p   | B (SE)             | p   |
| <b>Brain Structure</b>                |                      |       |                             |       |                               |       |                              |     |                    |     |
| <i>Volume</i>                         |                      |       |                             |       |                               |       |                              |     |                    |     |
| Cerebrum                              | 50.27 (28.25, 67.27) | <.001 | -0.0002 (-0.0004, -0.00002) | .03   | -0.01 (-0.02, 0.00)           | .02   | 0.11 (0.00, 0.20)            | .03 | 0.10 (-0.01, 0.19) | .05 |
| Inferior temporal L                   | 2.88 (1.46, 3.97)    | <.001 | -0.004 (-0.008, -0.001)     | <.001 | -0.01 (-0.02, 0.00)           | <.001 | 0.11 (0.00, 0.20)            | .03 | 0.10 (-0.01, 0.19) | .05 |
| Middle temporal L                     | 1.92 (0.67, 2.88)    | <.001 | 0.00 (-0.01, 0.00)          | .09   | 0.00 (-0.01, 0.00)            | .10   | 0.11 (-0.01, 0.20)           | .04 | 0.10 (-0.01, 0.19) | .05 |
| Middle temporal R                     | 2.48 (1.19, 3.47)    | <.001 | -0.003 (-0.006, 0.000)      | .01   | -0.01 (-0.02, 0.00)           | .01   | 0.11 (-0.01, 0.20)           | .05 | 0.10 (-0.01, 0.19) | .06 |
| Lateral occipital L                   | 1.78 (0.48, 2.79)    | .02   | -0.003 (-0.007, 0.000)      | .01   | 0.00 (-0.01, 0.00)            | .10   | 0.11 (-0.01, 0.20)           | .04 | 0.10 (-0.01, 0.19) | .05 |
| Inferior parietal L                   | 1.51 (-0.10, 2.75)   | .05   | -0.004 (-0.007, -0.002)     | <.001 | -0.01 (-0.01, 0.00)           | .07   | 0.11 (-0.01, 0.20)           | .03 | 0.10 (-0.01, 0.19) | .04 |
| Supramarginal R                       | 1.34 (-0.08, 2.44)   | .05   | 0.00 (0.00, 0.00)           | .22   | 0.00 (-0.01, 0.00)            | .26   | 0.10 (-0.01, 0.19)           | .05 | 0.10 (-0.01, 0.19) | .05 |
| <i>Surface area</i>                   |                      |       |                             |       |                               |       |                              |     |                    |     |
| Inferior temporal L                   | 0.86 (0.50, 1.14)    | <.001 | -0.02 (-0.03, -0.01)        | <.001 | -0.02 (-0.03, -0.01)          | <.001 | 0.12 (0.00, 0.21)            | .01 | 0.10 (-0.01, 0.19) | .05 |
| Lateral occipital L                   | 1.15 (0.70, 1.51)    | <.001 | -0.02 (-0.03, -0.01)        | <.001 | -0.02 (-0.03, -0.01)          | <.001 | 0.12 (0.00, 0.21)            | .01 | 0.10 (-0.01, 0.19) | .05 |
| Precuneus R                           | 0.77 (0.37, 1.08)    | <.001 | 0.00 (-0.02, 0.01)          | .17   | 0.00 (-0.01, 0.00)            | .17   | 0.11 (-0.01, 0.20)           | .04 | 0.10 (-0.01, 0.19) | .05 |
| <b>Functional connectivity</b>        |                      |       |                             |       |                               |       |                              |     |                    |     |
| Sensorimotor hand – salience          | 0.01 (0.00, 0.01)    | .19   | -0.04 (-0.64, 0.42)         | .46   | 0.00 (0.00, 0.00)             | .48   | 0.10 (-0.01, 0.19)           | .05 | 0.10 (-0.01, 0.19) | .05 |
| Auditory – right ventral diencephalon | -0.01 (-0.02, 0.00)  | .02   | -0.19 (-0.60, 0.18)         | .19   | 0.00 (0.00, 0.01)             | .19   | 0.10 (-0.01, 0.19)           | .05 | 0.10 (-0.01, 1.19) | .04 |

All multilevel mediation models controlled for fixed (age, sex, race/ethnicity, birthweight, premature birth, maternal age at birth, highest parent education, maternal depression, other prenatal substance use, school grade) and random (family, scanner/site) effects.

### References

- KESSLER, R. C., AVENEVOLI, S., GREEN, J., GRUBER, M. J., GUYER, M., HE, Y., JIN, R., KAUFMAN, J., SAMPSON, N. A., ZASLAVSKY, A. M. & MERIKANGAS, K. R. 2009. National Comorbidity Survey Replication Adolescent Supplement (NCS-A): III. Concordance of DSM-IV/CIDI Diagnoses With Clinical Reassessments. *Journal of the American Academy of Child & Adolescent Psychiatry*, 48, 386-399.
- MERIKANGAS, K., AVENEVOLI, S., COSTELLO, J., KORETZ, D. & KESSLER, R. C. 2009. National comorbidity survey replication adolescent supplement (NCS-A): I. Background and measures. *J Am Acad Child Adolesc Psychiatry*, 48, 367-9.
- O'LEARY, C. M., BOWER, C., ZUBRICK, S. R., GEELHOED, E., KURINCZUK, J. J. & NASSAR, N. 2010. A new method of prenatal alcohol classification accounting for dose, pattern and timing of exposure: improving our ability to examine fetal effects from low to moderate alcohol. *J Epidemiol Community Health*, 64, 956-62.
